# Supplementary material for: Comparative efficacy and acceptability of antidepressants, psychological interventions, and their combination for depressive disorder in children and adolescents: protocol for a network meta-analysis
Source: PubMed Central journal article supplement — BMJ Open. 2017 Aug 11;7(8):e016608. doi: 10.1136/bmjopen-2017-016608 (PMC5629731; doi:10.1136/bmjopen-2017-016608), 2017-08-11
Supplement: bmjopen-2017-016608.draft_revisions.pdf [file bmjopen-2017-016608.draft_revisions.pdf]

# BMJ Open

BMJ Open is committed to open peer review. As part of this commitment we make the peer review history of every article we publish publicly available.

When an article is published we post the peer reviewers' comments and the authors' responses online. We also post the versions of the paper that were used during peer review. These are the versions that the peer review comments apply to.

The versions of the paper that follow are the versions that were submitted during the peer review process. They are not the versions of record or the final published versions. They should not be cited or distributed as the published version of this manuscript.

BMJ Open is an open access journal and the full, final, typeset and author-corrected version of record of the manuscript is available on our site with no access controls, subscription charges or pay-per-view fees (<http://bmjopen.bmj.com>).

If you have any questions on BMJ Open's open peer review process please email [editorial.bmjopen@bmj.com](mailto:editorial.bmjopen@bmj.com)

# BMJ Open

## Comparative efficacy and acceptability of antidepressants, psychological interventions, and their combination for depressive disorder in children and adolescents: protocol for a network meta-analysis

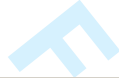

|                                 |                                                                                                                                                                                                                                                                                                                                                                                                                                                                                                                                                                                                                                                                                                                                                                                                                                                                                                                                                                                                                                                                                                                                                                                                                                                                                                                                                                                                                                                                                                                                                                                                                                                                                                                                                                                                                                                                                                     |
|---------------------------------|-----------------------------------------------------------------------------------------------------------------------------------------------------------------------------------------------------------------------------------------------------------------------------------------------------------------------------------------------------------------------------------------------------------------------------------------------------------------------------------------------------------------------------------------------------------------------------------------------------------------------------------------------------------------------------------------------------------------------------------------------------------------------------------------------------------------------------------------------------------------------------------------------------------------------------------------------------------------------------------------------------------------------------------------------------------------------------------------------------------------------------------------------------------------------------------------------------------------------------------------------------------------------------------------------------------------------------------------------------------------------------------------------------------------------------------------------------------------------------------------------------------------------------------------------------------------------------------------------------------------------------------------------------------------------------------------------------------------------------------------------------------------------------------------------------------------------------------------------------------------------------------------------------|
| Journal:                        | <i>BMJ Open</i>                                                                                                                                                                                                                                                                                                                                                                                                                                                                                                                                                                                                                                                                                                                                                                                                                                                                                                                                                                                                                                                                                                                                                                                                                                                                                                                                                                                                                                                                                                                                                                                                                                                                                                                                                                                                                                                                                     |
| Manuscript ID                   | bmjopen-2017-016608                                                                                                                                                                                                                                                                                                                                                                                                                                                                                                                                                                                                                                                                                                                                                                                                                                                                                                                                                                                                                                                                                                                                                                                                                                                                                                                                                                                                                                                                                                                                                                                                                                                                                                                                                                                                                                                                                 |
| Article Type:                   | Protocol                                                                                                                                                                                                                                                                                                                                                                                                                                                                                                                                                                                                                                                                                                                                                                                                                                                                                                                                                                                                                                                                                                                                                                                                                                                                                                                                                                                                                                                                                                                                                                                                                                                                                                                                                                                                                                                                                            |
| Date Submitted by the Author:   | 25-Feb-2017                                                                                                                                                                                                                                                                                                                                                                                                                                                                                                                                                                                                                                                                                                                                                                                                                                                                                                                                                                                                                                                                                                                                                                                                                                                                                                                                                                                                                                                                                                                                                                                                                                                                                                                                                                                                                                                                                         |
| Complete List of Authors:       | Zhou, Xinyu; The First Affiliated Hospital of Chongqing Medical University, Department of Neurology and Psychiatry<br>Cipriani, Andrea; University of Oxford, Department of Psychiatry; Warneford Hospital, Oxford Health NHS Foundation Trust<br>Zhang, Yuqing; The First Affiliated Hospital of Chongqing Medical University, Department of Neurology and Psychiatry<br>Cuijpers, Pim; Vrije Universiteit Amsterdam, Department of Clinical, Neuro and Developmental Psychology, Amsterdam Public Health research institute<br>Hetrick, Sarah; University of Melbourne, Orygen, The National Centre of Excellence in Youth Mental Health, and the Centre of Youth Mental Health<br>Weisz, John; Harvard University, Department of Psychology<br>Pu, Juncai; The First Affiliated Hospital of Chongqing Medical University, Department of Neurology and Psychiatry<br>Del Giovane, Cinzia; University of Modena and Reggio Emilia, Clinical and Diagnostic Medicine and Public Health<br>Furukawa, Toshi; Kyoto University, Department of Health Promotion and Human Behavior, Kyoto University Graduate School of Medicine and School of Public Health<br>Barth, Jürgen; University Hospital and University of Zurich, Institute of Complementary and Integrative Medicine<br>Coghill, David; University of Melbourne, Departments of Paediatrics and Psychiatry<br>Leucht, Stefan; Technische Universität München, Department of Psychiatry and Psychotherapy<br>Yang, Lining; The First Affiliated Hospital of Chongqing Medical University, Department of Neurology and Psychiatry<br>Ravindran, Arun ; University of Toronto, Department of Psychiatry<br>Xie, Peng; The First Affiliated Hospital of Chongqing Medical University, Department of Neurology and Psychiatry; Chongqing Medical University, Institute of Neuroscience and the Collaborative Innovation Center for Brain Science |
| <b>Primary Subject Heading</b>: | Mental health                                                                                                                                                                                                                                                                                                                                                                                                                                                                                                                                                                                                                                                                                                                                                                                                                                                                                                                                                                                                                                                                                                                                                                                                                                                                                                                                                                                                                                                                                                                                                                                                                                                                                                                                                                                                                                                                                       |
| Secondary Subject Heading:      | Mental health, Pharmacology and therapeutics, Evidence based practice                                                                                                                                                                                                                                                                                                                                                                                                                                                                                                                                                                                                                                                                                                                                                                                                                                                                                                                                                                                                                                                                                                                                                                                                                                                                                                                                                                                                                                                                                                                                                                                                                                                                                                                                                                                                                               |
| Keywords:                       | Depression & mood disorders < PSYCHIATRY, Child & adolescent psychiatry < PSYCHIATRY, antidepressant, psychotherapy, network meta-                                                                                                                                                                                                                                                                                                                                                                                                                                                                                                                                                                                                                                                                                                                                                                                                                                                                                                                                                                                                                                                                                                                                                                                                                                                                                                                                                                                                                                                                                                                                                                                                                                                                                                                                                                  |

1  
2  
3  
4  
5  
6  
7  
8  
9  
10  
11  
12  
13  
14  
15  
16  
17  
18  
19  
20  
21  
22  
23  
24  
25  
26  
27  
28  
29  
30  
31  
32  
33  
34  
35  
36  
37  
38  
39  
40  
41  
42  
43  
44  
45  
46  
47  
48  
49  
50  
51  
52  
53  
54  
55  
56  
57  
58  
59  
60

|  |                             |
|--|-----------------------------|
|  | analysis, systematic review |
|  |                             |

SCHOLARONE™  
Manuscripts

For peer review only

1  
2  
3 **Comparative efficacy and acceptability of antidepressants, psychological interventions, and their**  
4 **combination for depressive disorder in children and adolescents: protocol for a network meta-**  
5 **analysis**  
6  
7  
8  
9

10  
11  
12 Xinyu Zhou,<sup>1</sup> Andrea Cipriani,<sup>2,3</sup> Yuqing Zhang,<sup>1</sup> Pim Cuijpers,<sup>4</sup> Sarah E. Hetrick,<sup>5</sup> John R. Weisz,<sup>6</sup> Juncai Pu,<sup>1</sup>  
13  
14 Cinzia Del Giovane,<sup>7</sup> Toshiaki A. Furukawa,<sup>8</sup> Jürgen Barth,<sup>9</sup> David Coghill,<sup>10</sup> Stefan Leucht<sup>11</sup> Lining Yang,<sup>1</sup>  
15  
16 Arun V Ravindran,<sup>12</sup> Peng Xie<sup>1</sup>  
17  
18  
19  
20  
21

22  
23 <sup>1</sup> Department of Neurology and Psychiatry, The First Affiliated Hospital of Chongqing Medical University,  
24 Chongqing, China; Institute of Neuroscience and the Collaborative Innovation Center for Brain Science,  
25 Chongqing Medical University, Chongqing, China  
26  
27

28  
29 <sup>2</sup> Department of Psychiatry, University of Oxford, Warneford Hospital, Oxford, UK

30  
31 <sup>3</sup> Oxford Health NHS Foundation Trust, Warneford Hospital, Oxford, UK

32  
33 <sup>4</sup> Department of Clinical, Neuro and Developmental Psychology, Amsterdam Public Health research institute,  
34 Vrije Universiteit Amsterdam, The Netherlands  
35

36  
37 <sup>5</sup> Orygen, The National Centre of Excellence in Youth Mental Health, and the Centre of Youth Mental Health,  
38 University of Melbourne, Melbourne, Australia  
39

40  
41 <sup>6</sup> Department of Psychology, Harvard University, Cambridge, MA, USA

42  
43 <sup>7</sup> Department of Diagnostic, Clinical and Public Health Medicine, University of Modena and Reggio Emilia,  
44 Modena, Italy  
45

46  
47 <sup>8</sup> Department of Health Promotion and Human Behavior, Kyoto University Graduate School of Medicine and  
48 School of Public Health, Kyoto, Japan  
49

50  
51 <sup>9</sup> Institute of Complementary and Integrative Medicine, University Hospital and University of Zurich, Zurich,  
52 Switzerland  
53

54  
55 <sup>10</sup> Departments of Paediatrics and Psychiatry, University of Melbourne, Melbourne, Australia

56  
57 <sup>11</sup> Department of Psychiatry and Psychotherapy, Technische Universität München, Munich, Germany  
58  
59  
60

1  
2  
3 <sup>12</sup> Department of Psychiatry, University of Toronto, Toronto, ON, Canada  
4  
5  
6

7 **Direct correspondence to:**

8 Prof. Peng Xie, Department of Neurology and Psychiatry, The First Affiliated Hospital of Chongqing Medical  
9 University, 1 Youyi Road, Yuzhong District, Chongqing 400016, China; E-mail: [xiepeng973@126.com](mailto:xiepeng973@126.com)  
10

11 Xinyu Zhou and Andrea Cipriani contributed equally to this work.  
12  
13

14  
15  
16  
17 Keywords: depression, child, adolescent, antidepressant, psychotherapy, network meta-analysis, systematic  
18 review  
19

20 Word count: 3381.  
21  
22  
23  
24  
25  
26  
27  
28  
29  
30  
31  
32  
33  
34  
35  
36  
37  
38  
39  
40  
41  
42  
43  
44  
45  
46  
47  
48  
49  
50  
51  
52  
53  
54  
55  
56  
57  
58  
59  
60

## ABSTRACT

**Introduction:** Depressive disorder is common in children and adolescents, with important consequences and serious impairments in terms of personal and social functioning. While both pharmacological and psychological interventions have been shown to be effective, there is still uncertainty about the balance between these and what treatment strategy should be preferred in clinical practice. Therefore, we aim to compare and rank in a network meta-analysis (NMA) the commonly used psychological, pharmacological and combined interventions for depressive disorder in young people.

**Methods and analysis:** We will update the literature search of two previous NMAs for the identification of trials of antidepressant and psychotherapy alone for depressive disorder in children and adolescents. For identification of trials of combination interventions, seven databases (PubMed, EMBASE, CENTRAL (Cochrane Central Register of Controlled Trials), Web of Science, PsycINFO, CINAHL, LiLACS) will be searched from date of inception. We will also search ClinicalTrials.gov, the World Health Organization International Clinical Trials Registry Platform, and check relevant reports on the US FDA website for unpublished data. Building on our previous findings in the field, we will include any commonly prescribed oral antidepressants, and any manualised or structured psychotherapies, as well as their combinations. Randomised controlled trials assessing any active intervention against active comparator or pill placebo/psychological controls in acute treatment for depressive disorder in children and adolescents will be included. The primary outcomes will be efficacy (mean change in depressive symptoms), and acceptability of treatment (dropout rate due to any cause). The secondary outcomes will be remission rate, tolerability of treatment (dropouts for adverse events), as well as suicide-related outcomes (suicidal behavior or ideation). We will perform Bayesian NMAs for all relative outcome measures. Subgroup analyses and sensitivity analyses will be conducted to assess the robustness of the findings.

**Dissemination:** This NMA will provide the most up to date and clinically useful information about the comparative efficacy and acceptability of antidepressants, psychological intervention and their combination in

1  
2  
3  
4  
5  
6  
7  
8  
9  
10  
11  
12  
13  
14  
15  
16  
17  
18  
19  
20  
21  
22  
23  
24  
25  
26  
27  
28  
29  
30  
31  
32  
33  
34  
35  
36  
37  
38  
39  
40  
41  
42  
43  
44  
45  
46  
47  
48  
49  
50  
51  
52  
53  
54  
55  
56  
57  
58  
59  
60

the acute treatment of children and adolescents with depressive disorder. The results will be disseminated through peer-reviewed publication.

**Protocol registration:** PROSPERO CRD42015020841

For peer review only

### Strengths and limitations of this study

1  
2  
3  
4  
5  
6  
7  
8  
9  
10  
11  
12  
13  
14  
15  
16  
17  
18  
19  
20  
21  
22  
23  
24  
25  
26  
27  
28  
29  
30  
31  
32  
33  
34  
35  
36  
37  
38  
39  
40  
41  
42  
43  
44  
45  
46  
47  
48  
49  
50  
51  
52  
53  
54  
55  
56  
57  
58  
59  
60

1. The network meta-analysis can integrate direct evidence with indirect evidence from multiple treatment comparisons and multiple control approaches to estimate the interrelations across all treatments, which can guide treatment decisions and guideline development.

2. For the first time the efficacy, acceptability, tolerability, and suicide-related outcomes of pharmacological and psychological interventions, alone or in combination for depressive disorder in children and adolescents will be comprehensively assessed in a network meta-analysis.

3. We will employ validated local and global methods to evaluate consistency and we will explore whether treatment effects are robust in network subgroup analyses and sensitivity analyses. The quality of evidence for network estimates of the primary outcomes will be assessed with the GRADE framework, which characterises the quality of a body of evidence on the basis of the study limitations, imprecision, heterogeneity or inconsistency, indirectness, and publication bias.



## Background

Depressive disorder in children and adolescents is a major public health problem, affecting 1% to 2% of children (6–12 years old) and 2% to 5% of adolescents (13–18 years old), with a peak incidence around puberty.<sup>1,2</sup> The course of depressive disorder in young people is often characterised by protracted episodes, frequent recurrence, and comorbid psychiatric disorders.<sup>3</sup> Compared with adults, the identification and diagnosis of depressive disorder in children and adolescents may be more often missed by clinicians<sup>4</sup> due to undifferentiated signs and symptoms and atypical presentations. Thus, many such patients exhibit serious impairments in social functioning (e.g., poor school achievement; relational problems with family members and peers),<sup>5</sup> and are significantly increased risk for suicide behaviors and ideation.<sup>6</sup> For example, a report from the American Academy of Child and Adolescent Psychiatry (AACAP) suggested that depressive disorder is responsible for over 500,000 suicide attempts by children and adolescents a year.<sup>7</sup>

The past two decades have seen significant increases in the data for children and adolescents with depression and both pharmacological and psychological therapies have been effective. Among current psychological interventions, based on our previous findings, CBT and IPT seem to be the best available psychotherapies for depression in children and adolescents.<sup>8,9</sup> Multiple pharmacological therapies have also been studied for the treatment of depressive disorder in children and adolescents.<sup>10–12</sup> The controversy about the use of antidepressants in this age group, due the potentially increased risk of suicidality, has not been fully resolved.<sup>13</sup> Recently, the findings of our previous studies showed most antidepressants do not seem to offer a clear benefit for children and adolescents, and fluoxetine is probably the best option to consider when a pharmacological treatment is indicated.<sup>10</sup>

Several clinical practice guidelines recommend that in children and adolescents, psychotherapy should be considered as the first-line intervention for the management of depressive disorder, while pharmacological treatments are often reserved for more severe illness or when psychotherapy does not work or is not available.<sup>14,15</sup> Nevertheless, the evidence-base for psychotherapy to be more effective and safer than antidepressants in the treatment of child and adolescent depressive disorder is not well established. A large, non-industry funded trial reported superior efficacy for fluoxetine compared to CBT in adolescents with

1  
2  
3 major depression.<sup>16</sup> Literature supports the notion that psychotherapy has its own side-effects.<sup>17</sup> However,  
4  
5 unlike with antidepressants, they are rarely measured systematically, making the comparison of safety and  
6  
7 tolerability harder.<sup>18</sup> Moreover, data from the adult studies showed that combination antidepressants and  
8  
9 psychotherapy is superior to either intervention alone.<sup>19,20</sup> Recently, a Cochrane conventional meta-analysis,  
10  
11 on the basis of the very limited evidence, reported that the effectiveness of psychological interventions,  
12  
13 antidepressant medication and a combination of these interventions for treating depressive disorders in  
14  
15 children and adolescents cannot be established.<sup>21</sup>  
16  
17

18  
19 Network meta-analysis has the advantage that all interventions that have been tested in randomised  
20  
21 controlled trials (RCTs) can be simultaneously compared, without requiring direct within-study treatment vs.  
22  
23 treatment comparisons. Thus effects of the different treatments can be estimated relative to each other as well  
24  
25 as to a common reference condition (e.g., pill placebo or psychological controls).<sup>22</sup> Network meta-analysis thus  
26  
27 overcomes some of the limitations of traditional meta-analysis, in which conclusions are largely restricted to  
28  
29 comparisons between treatments that have been directly compared in RCTs.<sup>23</sup> In our two previous network  
30  
31 meta-analyses the comparative efficacy and acceptability of psychotherapies and antidepressants for  
32  
33 depressive disorder in children and adolescents have been separately investigated.<sup>8,10</sup> The aim of the current  
34  
35 protocol is to synthesise all this evidence and provide clinicians with a reliable treatment algorithm of the  
36  
37 commonly used psychological, and pharmacological interventions, as well as their combinations for the acute  
38  
39 treatment of depressive disorder in children and adolescents.  
40  
41  
42  
43  
44

## 45 **Methods**

### 46 *Criteria for included studies*

#### 47 **Types of studies**

48  
49 Any randomised controlled trials (RCTs), including the first phase of cross-over trials as well as cluster-  
50  
51 randomised trials, will be included. Quasi-randomised trials (e.g., those allocating participants using alternate  
52  
53 days of the week) will be excluded. For trials of antidepressants alone, only double-blind RCTs (patients and  
54  
55 raters blinded) will be included. As it is difficult to utilise a double-blind design for patients in trials of  
56  
57  
58  
59  
60

1  
2  
3  
4  
5  
6  
7  
8  
9  
10  
11  
12  
13  
14  
15  
16  
17  
18  
19  
20  
21  
22  
23  
24  
25  
26  
27  
28  
29  
30  
31  
32  
33  
34  
35  
36  
37  
38  
39  
40  
41  
42  
43  
44  
45  
46  
47  
48  
49  
50  
51  
52  
53  
54  
55  
56  
57  
58  
59  
60

psychotherapy alone or the combination of antidepressant and psychotherapy, we will only include trials in which raters were blinded or participants were assessed by self-rating depression scales.

### **Types of participants**

We will include studies that enrolled participants aged less than 18 years of age when they are initially enrolled in the studies, of both sexes with a diagnosis of depressive disorder based on standardised diagnostic criteria (e.g., the Diagnostic and Statistical Manual of Mental Disorders or the International Classification of Diseases).<sup>24-29</sup> While it is accepted that subclinical depression still has a significant impact on an individuals' social and educational functioning, we will not include studies of this population. Similarly, studies where depressive disorder was not formally diagnosed will also be excluded for the same rationale that its clinical heterogeneity could violate the transitivity assumption in NMA (i.e. one can compare indirectly intervention B and C via intervention A).<sup>30</sup> We will also exclude trials in which participants are described as having psychotic depression or treatment-resistant depression, as their treatment response differs from patients without treatment resistance or symptoms of psychosis. Trials focusing on child or adolescent bipolar disorder will also be excluded, but not those involving patients with other comorbid psychiatric disorders (e.g., anxiety disorder). Where a study includes both adults and children/adolescents and the randomisation had been stratified according this variable, the data will be included if data on the depressed youths can be separately extracted from the manuscript, or can be obtained from the authors. Studies conducted in both inpatient and outpatient settings will be included. RCTs recruiting participants with an overall sample size of fewer than ten patients will be excluded.

### **Types of interventions**

For pharmacological interventions, we will include any commonly prescribed oral antidepressants (fixed or flexible doses). These will include tricyclic antidepressants (TCAs; amitriptyline, clomipramine, nortriptyline, desipramine, imipramine, etc.), selective serotonin reuptake inhibitors (SSRIs; escitalopram, fluoxetine, paroxetine, sertraline, etc.), and serotonin-norepinephrine reuptake inhibitors (SNRIs; venlafaxine,

1  
2  
3  
4 duloxetine), as well as novel agents mirtazapine and nefazodone. In terms of psychological interventions, we  
5  
6 will include any manualised or structured psychotherapies, e.g., behavioral therapy, cognitive-behavioral  
7  
8 therapy, cognitive therapy, family therapy, interpersonal therapy, play therapy, problem-solving therapy,  
9  
10 psychodynamic therapy, and supportive therapy. Table 1 provides the detailed description of  
11  
12 psychotherapies. Also, we will include the combination of both above-mentioned psychological interventions  
13  
14 and pharmacological interventions. For the pharmacological interventions, the control condition always is pill  
15  
16 placebo, and these for psychological control conditions will include waiting-list (WL), treatment as usual  
17  
18 (TAU), psychological placebo or attention placebo, as well as no-treatment (NT).  
19

20  
21  
22  
23 All RCTs comparing any active intervention (psychological interventions, pharmacological interventions,  
24  
25 or their combinations) with either active comparators or control conditions for acute treatment of depressive  
26  
27 disorder in children and adolescents will be included. The acute phase will be defined as from 4 to 16 week.  
28  
29 We will exclude trials with treatment duration of less than 4 weeks, because the onset of benefit for most  
30  
31 antidepressants often takes at least 4 weeks. If a study present data for more than one time point within our  
32  
33 pre-defined acute phase window or beyond 16 weeks, the 8-week (or the closest to 8-week) will be taken as  
34  
35 the time. Trials comparing the same antidepressant at different therapeutic doses will be merged in the same  
36  
37 node in the network analysis so long as they are within the dose range licensed by drug regulatory agencies.  
38  
39 Also, trials comparing the same type of psychological interventions but at different numbers of therapeutic  
40  
41 sessions, different delivery format (group, individual), different treatment medium (face-to-face, internet-  
42  
43 based), and different treatment conditions (with or without family involvement) will be considered as the  
44  
45 same node in the network analysis. We anticipate that any patient who meets all inclusion criteria, in  
46  
47 principal, is equally likely to be randomised to any of the interventions in the synthesis comparator set.  
48  
49

50  
51 We have generated an ideal network plot that is a fully connected network with all expected  
52  
53 interventions (Figure 1).  
54  
55

## 56 57 58 **Types of outcome measures** 59 60

1  
2  
3  
4  
5  
6  
7  
8  
9  
10  
11  
12  
13  
14  
15  
16  
17  
18  
19  
20  
21  
22  
23  
24  
25  
26  
27  
28  
29  
30  
31  
32  
33  
34  
35  
36  
37  
38  
39  
40  
41  
42  
43  
44  
45  
46  
47  
48  
49  
50  
51  
52  
53  
54  
55  
56  
57  
58  
59  
60

### *Primary outcomes*

- (1) Efficacy (as a continuous outcome), measured by the overall mean change scores on depressive symptom scales (self- or assessor-rated), e.g., Children's Depression Rating Scale (CDRS-R)<sup>31</sup> and Hamilton Depression Rating Scale (HAMD)<sup>32</sup> from baseline to endpoint.
- (2) Acceptability of treatment, defined as the proportion of patients who drop out of the study by any cause during the delivery of the intervention.

### *Secondary outcomes*

- (1) Efficacy (as dichotomous outcome), measured by the total number of patients who achieved the criteria of remission, defined as being below the threshold in depression rating score (e.g., less than 28 for CDRS-R),<sup>33</sup> while these thresholds are different across trials.
- (2) Tolerability of treatment, defined as the proportion of patients who discontinued treatment due to any adverse events during the delivery of the intervention.
- (3) Suicide-related outcome, estimated by the reported cases of definitive suicidal behavior or suicidal ideation during the acute phase of treatment. The definition of suicide-related outcome is based on the Columbia Classification Algorithm of Suicide Assessment (C-CASA).<sup>34</sup> For the antidepressants trials, the data on suicidality mainly referred to the Columbia re-analysis data reported in the FDA report.<sup>35</sup> If trials are not included in this report, we will attempt to extract the data on suicide-related outcome from the Medicines and Healthcare products Regulatory Agency database or the pharmaceutical company website. For the psychological trials and the combination trials, we will mainly extract the data on suicidality from original text, and from related reviews.
- (4) Global functional improvement, estimated by overall change scores on global assessment of functioning scales, e.g., Children's Global Assessment Scale (CGAS)<sup>36</sup> and Global Assessment of Functioning Scale (GAF),<sup>37</sup> or quality of life scales, e.g., Quality of Life Enjoyment and Satisfaction Questionnaire (Q-LES-Q).<sup>38</sup> When data are reported on more than one measure, we will first chose data from the CGAS, then the GAF, and finally the Q-LES-Q and others.

1  
2  
3  
4  
5  
6 Where depression symptoms are measured using more than one depression scale in a trial, we will  
7  
8 extract data from the depressive scales on the basis of a hierarchy of rating scales. The hierarchy will be based  
9  
10 on psychometric properties and appropriateness for use with children and adolescents and for consistency of  
11  
12 use across trials (referred from the Zhou et al study<sup>39</sup>, Table 2). We will also establish a hierarchy of  
13  
14 informants of depressive rating scales, with the clinician report first in the hierarchy, and then the child or  
15  
16 adolescent self-report.  
17

### 18 **Data Sources and Search strategy**

19  
20 For the identification of trials of antidepressant and psychotherapy alone for depressive disorder in  
21  
22 children and adolescents, we will update the literature search of our two previous network meta-analyses.<sup>8,10</sup>  
23  
24 Other eligible trials of the combinations of antidepressant and psychotherapy will be identified by searching  
25  
26 PubMed, EMBASE, CENTRAL (Cochrane Central Register of Controlled Trials), Web of Science, PsycINFO,  
27  
28 ProQuest, CINAHL, LiLACS from date of inception with Medical Subject Headings (MeSH) and text words:  
29  
30 (depress\* or dysthymi\* or mood disorder\* or affective disorder\*) and (adolesc\* or child\* or boy\* or girl\* or  
31  
32 juvenil\* or minors or paediatric\* or pediatric\* or pubescen\* or school\* or student\* or teen\* or young or youth\*)  
33  
34 and (“selective serotonin reuptake inhibitor\*” or SSRIs or “serotonin norepinephrine reuptake inhibitor\*” or  
35  
36 SNRIs or citalopram or fluoxetine or paroxetine or sertraline or escitalopram or fluvoxamine or venlafaxine or  
37  
38 duloxetine “noradrenergic and specific serotonergic antidepressants” or NaSSA or mirtazapine or TCA or  
39  
40 tricyclic or amitriptyline or clomipramine or desipramine or imipramine or nortriptyline) and  
41  
42 (psychotherapy\* or behavio\* or “family therap\*” or CBT or cognitive or interpersonal or IPT or “play therap\*”  
43  
44 or supportive or problem-solving or psychodynamic). We will also search ClinicalTrials.gov in USA and other  
45  
46 international trial registers via the International Clinical Trials Registry Platform (ICTRP) in WHO. We will  
47  
48 also check relevant reports on the US Food and Drug Administration (FDA) website, and hand-search key  
49  
50 journals, conference proceedings, such as, *J Child Adolesc Psychopharmacol*, *J Am Acad Child Adolesc Psychiatry*,  
51  
52 *Child Adolesc Psychiatry Ment Health*, *Psychopharmacol Bull*, *Arch Gen Psychiatry*, *Am J Psychiatry*, *Eur Psychiatry*,  
53  
54 *Depress Anxiety*. There will be no restrictions on language, or publication year. Additional relevant studies  
55  
56  
57  
58  
59  
60

1  
2  
3 will be obtained by scanning reference lists of trials identified in the initial searches and relevant review  
4 papers. We will also inquire at the relative pharmaceutical companies (e.g., GlaxoSmithKline, Lilly, Organon,  
5 Forest Pharmaceuticals, Bristol-Myers Squibb) and search their websites for unpublished data. All relevant  
6 experts and principal manufacturers will be contacted to supplement incomplete reports of the original  
7 papers or to provide new data for unpublished studies.  
8  
9

## 10 11 12 13 14 15 16 17 **Study selection and data extraction**

### 18 *Selection of trials*

19  
20 Titles and abstracts identified from the search strategies will be independently examined by two  
21 reviewers (XZ and YZ). If both reviewers judge that the trial does not meet eligibility criteria, we will exclude  
22 it. Then, we will obtain the full-texts of all remaining articles and determine whether to include them  
23 according to inclusion criteria described above. We will calculate the inter-rater reliability of the two raters.  
24  
25 Any disagreements will be resolved by a third review author (AC or PX) or by consultation with the authors  
26 of the articles. The reasons for exclusion of trials will be reported in the characteristics of excluded studies list.  
27  
28  
29  
30  
31  
32  
33  
34  
35

### 36 *Data extraction*

37  
38 Two independent reviewers (XZ and YZ) will extract the data from each included trial using  
39 standardised data extraction forms, including study characteristics (e.g., first listed author, publication year,  
40 title, publication type, publication journal, country, and sponsor), patient characteristics (e.g., diagnostic  
41 criteria, comorbidities, the age of patients, patient setting, the number of patients, the gender of patients, and  
42 severity of depression at baseline), intervention details (e.g., the type of intervention, the treatment duration,  
43 the dose of antidepressant agent, the length and number of sessions of psychotherapy, treatment delivery and  
44 treatment medium of psychotherapy) and outcome measures (primary outcomes and secondary outcomes).  
45  
46 We will assess and report the reliability of the reviewers' data extraction on each coded variable. Any  
47 disagreements will be resolved by a third review author (AC or PX). Where necessary, the authors of the  
48 studies will be contacted for further information.  
49  
50  
51  
52  
53  
54  
55  
56  
57  
58  
59  
60

### *Risk of bias assessment*

We will assess risk of bias as “low risk”, “unclear risk”, or “high risk”, in accordance with the Cochrane Collaboration’s Risk of bias tool as described in the Cochrane Hand book for Systematic Reviews of Interventions.<sup>40</sup> The following items will be assessed: sequence generation, allocation concealment, blinding of participants and personnel, blinding of outcome assessors, incomplete outcome data, selective outcome reporting, and other sources of bias (e.g., sponsorship bias/researcher allegiance bias). Two independent review authors (XZ and YZ) will assess the risk of bias in selected studies. Degree of agreement between the two independent raters will be reported. Any disagreements will be resolved by a third review author (AC or PX). Where necessary, the authors of the studies will be contacted for further information. Studies will be classified as having high risk of bias if two or more domains were rated as high risk of bias; low if five or more were rated as low risk of bias and none was rated as high risk of bias, and all other cases will be assumed to pertain to moderate risk.

### **Statistical analysis**

Network meta-analysis combines direct and indirect evidence for all relative treatment effects and provides estimates with maximum power.<sup>23</sup> First, we will perform pairwise meta-analyses of direct evidence using the random-effects model with STATA version 14.0. Second, we will also perform a random-effects network meta-analysis (NMA) within a Bayesian framework using Markov chain Monte Carlo in WinBUGS version 1.4.3. Where different measures are used to assess the same outcome, continuous outcomes data will be pooled with standardised mean difference (SMD), and dichotomous outcomes will be analysed by calculating the odds ratio (OR). In the presence of minimally informative priors, Credible Intervals (CrIs) can be interpreted similarly to confidence intervals (CIs).

Missing dichotomous outcome data will be managed according to the intention to treat (ITT) principle, and all the dropouts after randomisation will be considered to be non-responders. Missing continuous outcome data will be analysed using the completer data. When p-values, t-values, confidence intervals or



1  
2  
3 standard errors are reported in articles, SD will be calculated from their values.<sup>41</sup> Where SDs are missing,  
4 attempts will be made to obtain these data through contacting trial authors. When this fails, they will be  
5  
6 borrowed from the other trials in the network or from other published reports.<sup>41</sup>  
7  
8

9  
10 In the analysis of network meta-analysis, the pooled estimates will be obtained using the Markov Chains  
11 Monte Carlo method. Two Markov chains will be run simultaneously with different arbitrarily chosen initial  
12 values and non-informative priors will be used for the parameters. To ensure convergence, trace plots and the  
13 Brooks-Gelman-Rubin statistic will be assessed.<sup>42</sup> We will also estimate the ranking probabilities for all  
14 treatments of being at each possible rank for each intervention. Then, we will obtain a treatment hierarchy  
15 using the surface under the cumulative ranking curve (SUCRA) and mean ranks. SUCRA can also be  
16 interpreted as the percentage of efficacy/safety of a treatment that would be ranked first without  
17 uncertainty.<sup>43</sup>  
18  
19  
20  
21  
22  
23  
24  
25  
26  
27  
28  
29

### 30 *Measures for transitivity assumption*

31  
32 We will assess whether the included interventions are similar when they are evaluated in RCTs with  
33 different designs; and whether the distributions of clinical and methodological variables that can act as effect  
34 modifiers across treatment comparison are balanced across comparisons. The clinical features, which have  
35 been demonstrated to date to moderate efficacy of antidepressants and psychotherapy in children and  
36 adolescents include bipolarity,<sup>44</sup> psychotic features,<sup>45</sup> subthreshold depression.<sup>46</sup> We have assured transitivity  
37 in our network with regard to these variables by limiting our samples to participants with non-psychotic  
38 unipolar depressive disorders. Other clinical or methodological variables that may influence our primary  
39 outcomes of treatment efficacy or acceptability include: age, sex, depressive severity at baseline, and the  
40 treatment duration.  
41  
42  
43  
44  
45  
46  
47  
48  
49  
50

### 51 *Measures for heterogeneity*

52  
53 In standard pairwise meta-analyses we will estimate a different heterogeneity variance for each pairwise  
54 comparisons; in network meta-analysis we will assume a common estimate for the heterogeneity variance  
55 across the different comparisons. We will assess statistically the presence of heterogeneity within each  
56  
57  
58  
59  
60

1  
2  
3 pairwise comparison using the I-squared statistic<sup>47</sup> and its 95% confidence interval that measures the  
4 percentage of variability that cannot be attributed to random error. The assessment for the presence of  
5 statistical heterogeneity in the entire network will be based on the magnitude of the heterogeneity variance  
6 parameter ( $\tau^2$ ) estimated from the NMA models. We will also estimate a total I-squared value and predictive  
7 intervals for heterogeneity in the network.<sup>48</sup>  
8  
9

### 10 11 12 13 14 15 16 17 *Measures for inconsistency*

18 NMA assumes that there is consistency in the network (i.e. direct and indirect evidence are in  
19 agreement). However, the assumption of consistency can be violated either in the entire network or in certain  
20 parts (i.e. loops of evidence) of the network.<sup>49</sup> Therefore, consistency needs to be checked. We will evaluate  
21 the presence of local inconsistency and global inconsistency in STATA version 14.0 and will be duplicated in  
22 R software.<sup>50</sup>  
23  
24  
25  
26  
27  
28  
29  
30  
31

### 32 *Measures for publication bias*

33 We will use the contour-enhanced funnel plot and Egger's test to assess risk of publication bias within  
34 each pairwise comparison.<sup>51</sup> We will also use the comparison-adjusted funnel plots of all trials with placebo  
35 controls or inactive controls to investigate whether results in imprecise trials differ from those in more precise  
36 trials in network meta-analysis.<sup>52</sup>  
37  
38  
39  
40  
41  
42  
43  
44

### 45 *Subgroup analyses and sensitivity analyses*

46 Where possible, we will conduct the network meta-regression meta-analyses of data on primary  
47 outcomes for the: (i) age of participants (children vs. adolescents); (ii) sex ratio; (iii) the severity of depressive  
48 symptoms at baseline; and (iv) the treatment duration. If possible, we will do some extra subgroup analyses  
49 according to the results of heterogeneity and inconsistency. In the sensitivity analysis, trials where missing  
50 data have been imputed will be excluded, and trials where high risk of bias rating have been assessed will be  
51 excluded. And, we will not only test whether the results change but also if transitivity (consistency/model fit)  
52  
53  
54  
55  
56  
57  
58  
59  
60

1  
2  
3 is affected. We will also examine some variables (e.g., sample size of trials<sup>53</sup>), as continuous measure in meta-  
4  
5 regression analyses.  
6  
7

### 8 9 10 *GRADE quality assessment*

11  
12 We will also assess the quality of evidence contributing to primary outcomes with the GRADE  
13  
14 framework, which characterises the quality of a body of evidence on the basis of the study limitations,  
15  
16 imprecision, heterogeneity or inconsistency, indirectness, and publication bias.<sup>54</sup> The starting point for  
17  
18 confidence in each network estimate is high, but will be downgraded according to the assessments of these  
19  
20 five aspects.  
21  
22

### 23 24 25 *Ethics and dissemination*

26  
27  
28 This network meta-analysis does not need ethical approval, as data used here are based on aggregated  
29  
30 data in the public domain. Findings from the analysis will provide an overview and information on the  
31  
32 relative efficacy and acceptability of antidepressant medications, psychological therapies, and their  
33  
34 combination for depressive disorder in children and adolescents. It is suggested that the findings will have  
35  
36 significant implications for clinical practice and further research.  
37  
38  
39  
40  
41  
42  
43  
44  
45  
46  
47  
48  
49  
50  
51  
52  
53  
54  
55  
56  
57  
58  
59  
60

1  
2  
3  
4 **Contributors** PX, AC, and XZ conceived the study and drafted the protocol. PX, AC and XZ wrote the first  
5  
6  
7 draft of the manuscript. PC, SEH, JRW, CDG, TAF, JB, DC, SL, AVR assisted in protocol design and revision.  
8  
9  
10 XZ, YZ, and LY participated in the search strategy development. CDG, and JP participated in the design of  
11  
12 data synthesis and analysis. All the authors have approved the publication of the protocol.

13  
14  
15 **Funding** This work is supported by the National Basic Research Program of China (973 Program) (Grant No.  
16  
17  
18 2009CB918300). The funders had no role in the protocol design; the writing of the protocol; or the decision to  
19  
20  
21 submit the protocol for publication.

22  
23  
24 **Competing interests** AC reports personal fees from Accord Healthcare as an expert witness for a patent issue  
25  
26  
27 about quetiapine extended release. SEH is an Editor of the Cochrane Common Mental Disorders Group, an  
28  
29  
30 author of the Cochrane systematic review of newer generation antidepressants for depression in children and  
31  
32  
33 adolescents, and an author (senior) on the Cochrane review of psychological, pharmacological and their  
34  
35  
36 combination for child/adoles depression. DC reports grants and personal fees from Shire; personal fees from  
37  
38  
39 Eli Lilly, Janssen Cilag, Novartis, Sandoz, Oxford University Press; and grants from European Union FP7,  
40  
41  
42 outside of the submitted work. Eli Lilly has provided drugs for a clinical trial led by SL as the principal  
43  
44  
45 investigator. AVR reports personal fees from Bristol Myers Squibb, Pfizer, Sunovion; grants from Pfizer,  
46  
47  
48 Grand Challenges Canada, Canadian Institute of Health Research, and AstraZeneca, outside of the submitted  
49  
50  
51 work. TAF has received lecture fees from Eli Lilly, Janssen, Meiji, MSD, Otsuka, Pfizer and Tanabe-Mitsubishi,  
52  
53  
54 and consultancy fees from Sekisui Chemicals and Takeda Science Foundation. He has received royalties from  
55  
56  
57  
58  
59  
60

1  
2  
3  
4 Igaku-Shoin and Nihon Bunka Kagaku-sha publishers. He has received research support from Mochida and  
5  
6  
7 Tanabe-Mitsubishi. XZ, YZ, PC, JRW, JP, CDG, TAF, JB, and LY declare no competing interests.  
8

9  
10 **Acknowledgments** Andrea Cipriani is supported by the National Institute for Health Research Oxford  
11  
12 Cognitive Health Clinical Research Facility. We thank Philip Hazell from Discipline of Psychiatry, Sydney  
13  
14 Medical School, Concord West, NSW, Australia, David Cohen from Department of Child and Adolescent  
15  
16 Psychiatry, Hôpital Pitié-Salpêtrière, Institut des Systèmes Intelligents et Robotiques, Université Pierre et  
17  
18 Marie Curie, Paris, France, and Craig Whittington from Doctor Evidence, Santa Monica, CA, USA, for their  
19  
20  
21  
22  
23  
24 valuable advice.  
25

26  
27 **Provenance and peer review** Not commissioned; externally peer-reviewed.  
28

29  
30 **Open Access** This is an Open Access article distributed in accordance with the Creative Commons  
31  
32 Attribution- Non Commercial (CC BY-NC 4.0) license, which permits others to distribute, remix, adapt, build  
33  
34 upon this work non-commercially, and license their derivative works on different terms, provided the  
35  
36 original work is properly cited and the use is non-commercial. See: See:  
37  
38  
39  
40  
41 <http://creativecommons.org/licenses/by-nc/4.0/>  
42  
43  
44  
45  
46  
47  
48  
49  
50  
51  
52  
53  
54  
55  
56  
57  
58  
59  
60

## References

1. Costello EJ, Mustillo S, Erkanli A, et al. Prevalence and development of psychiatric disorders in childhood and adolescence. *Arch Gen Psychiatry* 2003;60:837-44.
2. Kessler RC, Berglund P, Demler O, et al. Lifetime prevalence and age-of-onset distributions of DSM-IV disorders in the National Comorbidity Survey replication. *Arch Gen Psychiatry* 2005;62:593-602.
3. Thapar A, Collishaw S, Pine DS, et al. Depression in adolescence. *Lancet* 2012;379:1056-67.
4. Philip H. Depression in children may go unnoticed and untreated. *BMJ* 2002;325:229-30.
5. Puig-Antich J, Lukens E, Davies M, et al. Psychosocial functioning in prepubertal major depressive disorders. II. Interpersonal relationships after sustained recovery from affective episode. *Arch Gen Psychiatry* 1985;42:511-17.
6. Gould MS, King R, Greenwald S, et al. Psychopathology associated with suicidal ideation and attempts among children and adolescents. *J Am Acad Child Adolesc Psychiatry* 1998;37:915-23.
7. Centers for Disease Control and Prevention (CDC). Suicide trends among youths and young adults aged 10-24 years-United States, 1990-2004. *Morb Mortal Wkly Rep* 2007;56:905-8.
8. Zhou X, Hetrick SE, Cuijpers P, et al. Comparative efficacy and acceptability of psychotherapies for depression in children and adolescents: A systematic review and network meta-analysis. *World Psychiatry* 2015;14:207-22.
9. Weisz JR, McCarty CA, Valeri SM. Effects of Psychotherapy for Depression in Children and Adolescents: A Meta-Analysis. *Psychol Bull* 2006;132:132-49.
10. Cipriani A, Zhou X, Del Giovane C, et al. Comparative efficacy and tolerability of antidepressants for major depressive disorder in children and adolescents: a network meta-analysis. *Lancet* 2016;388:881-90.
11. Hetrick SE, McKenzie JE, Cox GR, et al. Newer generation antidepressants for depressive disorders in children and adolescents. *Cochrane Database Syst Rev* 2012;11:CD004851.
12. Hazell P, Mirzaie M. Tricyclic drugs for depression in children and adolescents. *Cochrane Database Syst Rev* 2013;6:CD002317.

- 1  
2  
3  
4 13. U.S. Food and Drug Administration (FDA). Suicidality in children and adolescents being treated with  
5 antidepressant medications.  
6  
7  
8 [www.fda.gov/drugs/drugsafety/postmarketdrugsafetyinformationforpatientsandproviders/ucm161679.](http://www.fda.gov/drugs/drugsafety/postmarketdrugsafetyinformationforpatientsandproviders/ucm161679.htm)  
9  
10 [htm](http://www.fda.gov/drugs/drugsafety/postmarketdrugsafetyinformationforpatientsandproviders/ucm161679.htm) (accessed 20 Jan 2017).  
11
- 12 14. National Collaborating Centre for Mental Health (UK). Depression in Children and Young People:  
13 Identification and management in primary, community and secondary care. British Psychological Society,  
14 2005; Available from [www.ncbi.nlm.nih.gov/books/NBK56425/](http://www.ncbi.nlm.nih.gov/books/NBK56425/). (accessed 20 Jan 2017).  
15  
16  
17
- 18 15. McDermott B, Baigent M, Chanen A, et al. Clinical practice guidelines: Depression in adolescents and  
19 young adults. Melbourne: beyondblue: the national depression initiative,  
20 2011.<https://www.bspg.com.au/dam/bsg/product?client=BEYONDBLUE&prodid=BL/0890&type=file>  
21  
22 (accessed 20 Jan 2017).  
23  
24  
25  
26
- 27 16. March J, Silva S, Petrycki S, et al. Fluoxetine, cognitive-behavioral therapy, and their combination for  
28 adolescents with depression: Treatment for Adolescents With Depression Study (TADS) randomized  
29 controlled trial. *JAMA* 2004; 292(7): 807-20.  
30  
31  
32  
33
- 34 17. Nutt DJ, Sharpe M. Uncritical positive regard? Issues in the efficacy and safety of psychotherapy. *J*  
35 *Psychopharmacol* 2008; 22(1): 3-6.  
36  
37
- 38 18. Linden M, Schermuly-Haupt ML. Definition, assessment and rate of psychotherapy side effects. *World*  
39 *Psychiatry* 2014; 13(3): 306-9.  
40  
41  
42
- 43 19. Pampallona S, Bollini P, Tibaldi G, et al. Combined pharmacotherapy and psychological treatment for  
44 depression: A systematic review. *Arch Gen Psychiatry*. 2004;61(7):714-9.  
45  
46
- 47 20. de Maat SM, Dekker J, Schoevers RA, et al. Relative efficacy of psychotherapy and combined therapy in  
48 the treatment of depression: A meta-analysis. *Eur Psychiatry* 2007;22(1):1-8.  
49  
50
- 51 21. Cox GR, Callahan P, Churchill R, et al. Psychological therapies versus antidepressant medication, alone  
52 and in combination for depression in children and adolescents. *Cochrane Database Syst Rev*  
53 2012;11:CD008324.  
54  
55  
56  
57  
58  
59  
60

- 1  
2  
3  
4 22. Mavridis D, Giannatsi M, Cipriani A, et al. A primer on network meta-analysis with emphasis on mental  
5 health. *Evid Based Ment Health*. 2015 May;18(2):40-6.  
6  
7  
8 23. Lu G, Ades AE. Combination of direct and indirect evidence in mixed treatment comparisons. *Stat Med*  
9  
10 2004;23:3105-24.  
11  
12 24. American Psychiatric Association. *Diagnostic and Statistical Manual of Mental Disorders (DSM-III)*. 3rd  
13 Edition. Washington, DC: American Psychiatric Association, 1980.  
14  
15 25. American Psychiatric Association. *Diagnostic and Statistical Manual of Mental Disorders (DSM-III-R)*. 3rd  
16 Edition. Washington, DC: American Psychiatric Association, 1987.  
17  
18 26. American Psychiatric Association. *Diagnostic and Statistical Manual of Mental Disorders (DSM-IV)*. 4th  
19 Edition. Washington, DC: American Psychiatric Association, 1994.  
20  
21 27. World Health Organization (WHO). *The ninth revision of the international classification of diseases and related*  
22 *health problems (ICD-9)*. Geneva: World Health Organization, 1978.  
23  
24 28. World Health Organization (WHO). *The tenth revision of the international classification of diseases and related*  
25 *health problems (ICD-10)*. Geneva: World Health Organization, 1992.  
26  
27 29. Kaufman J, Birmaher B, Brent D, et al. Schedule for affective disorders and schizophrenia for school-age  
28 children-present and lifetime version (K-SADS-PL): initial reliability and validity data. *J Am Acad Child*  
29 *Adolesc Psychiatry* 1997;36:980-8.  
30  
31 30. Salanti G. Indirect and mixed-treatment comparison, network, or multiple-treatments meta-analysis: many  
32 names, many benefits, many concerns for the next generation evidence synthesis tool. *Res Synth Meth* 2012;  
33 3:80-97.  
34  
35 31. Poznanski EO, Mokros HB. Children's depression rating scale, revised (CDRS-R): manual. *Western*  
36 *Psychological Services*, 1996.  
37  
38 32. Hamilton M. A rating scale for depression. *J Neurol Neurosurg Psychiatry* 1960;23:56-62.  
39  
40 33. Riedel M, Moller HJ, Obermeier M, et al. Response and remission criteria in major depression – a  
41 validation of current practice. *J Psychiatr Res* 2010;44:1063-8.  
42  
43  
44  
45  
46  
47  
48  
49  
50  
51  
52  
53  
54  
55  
56  
57  
58  
59  
60



- 1  
2  
3  
4 34. Posner K, Oquendo MA, Gould M, et al. Columbia classification algorithm of suicide assessment (C-  
5  
6 CASA): classification of suicidal events in the FDA's pediatric suicidal risk analysis of antidepressants. *Am*  
7  
8 *J Psychiatry* 2007;164:1035-43.  
9
- 10 35. Hammad TA. Review and evaluation of clinical data. Washington, DC, US Food and Drug  
11  
12 Administration. [http://www.fda.gov/ohrms/dockets/ac/04/briefing/2004-4065b1-10-tab08-hammads-](http://www.fda.gov/ohrms/dockets/ac/04/briefing/2004-4065b1-10-tab08-hammads-review.pdf)  
13  
14 [review.pdf](http://www.fda.gov/ohrms/dockets/ac/04/briefing/2004-4065b1-10-tab08-hammads-review.pdf) (accessed 20 Jan 2017).  
15
- 16 36. Shaffer D, Gould MS, Brasic J, et al. A children's global assessment scale (CGAS). *Arch Gen Psychiatry*  
17  
18 1983;40:1228-31.  
19
- 20 37. Endicott J, Spitzer RL, Fleiss JL, et al. The Global Assessment Scale: a procedure for measuring overall  
21  
22 severity of psychiatric disturbance. *Arch Gen Psychiatry* 1976;33:766-71.  
23
- 24 38. Endicott J, Nee J, Harrison W, et al. Quality of Life Enjoyment and Satisfaction Questionnaire: a new  
25  
26 measure. *Psychopharmacol Bull* 1993;29:321-326.  
27
- 28 39. Zhou X, Qin B, Whittington C, et al. Comparative efficacy and tolerability of first-generation and newer-  
29  
30 generation antidepressant medications for depressive disorders in children and adolescents: study  
31  
32 protocol for a systematic review and network meta-analysis. *BMJ Open* 2015;5:e007768.  
33
- 34 40. Higgins JPT, Green S. *Cochrane handbook for systematic reviews of interventions version 5.1.0* [updated March  
35  
36 2011]. The Cochrane Collaboration, 2011. <http://handbook.cochrane.org/> (accessed 20 Jan 2017).  
37
- 38 41. Furukawa TA, Barbui C, Cipriani A, et al. Imputing missing standard deviations in meta-analyses can  
39  
40 provide accurate results. *J Clin Epidemiol* 2006;59:7-10.  
41
- 42 42. Brooks SP, Gelman A. Alternative methods for monitoring convergence of iterative simulations. *J Comput*  
43  
44 *Graph Stat* 1998;7:434-45.  
45
- 46 43. Salanti G, Ades AE, Ioannidis JP. Graphical methods and numerical summaries for presenting results from  
47  
48 multiple-treatment meta-analysis: an overview and tutorial. *J Clin Epidemiol* 2011; 64:163-71.  
49
- 50 44. Liu HY, Potter MP, Woodworth KY, et al. Pharmacologic treatments for pediatric bipolar disorder: a  
51  
52 review and meta-analysis. *J Am Acad Child Adolesc Psychiatry*. 2011;50:749-62.  
53  
54  
55  
56  
57  
58  
59  
60

- 1  
2  
3  
4 45. Sullivan SA, Lewis G, Gunnell D, et al. The longitudinal association between psychotic experiences,  
5 depression and suicidal behaviour in a population sample of adolescents. *Soc Psychiatry Psychiatr*  
6 *Epidemiol.* 2015;50:1809-17.  
7  
8  
9  
10 46. Wesselhoeft R, Sørensen MJ, Heiervang ER, et al. Subthreshold depression in children and adolescents - a  
11 systematic review. *J Affect Disord.* 2013; 151:7-22.  
12  
13 47. Higgins JP, Thompson SG, Deeks JJ, et al. Measuring inconsistency in meta-analyses. *BMJ* 2003;327:557-60.  
14  
15 48. Jackson D, Barrett JK, Rice S, et al. A design-by-treatment interaction model for network meta-analysis  
16 with random inconsistency effects. *Statistics in Medicine* 2014; 33:3639-54.  
17  
18  
19 49. Dias S, Welton NJ, Sutton AJ, et al. Evidence synthesis for decision making 4: inconsistency in networks of  
20 evidence based on randomized controlled trials. *Med Decis Making* 2013; 33:641-656.  
21  
22  
23 50. Higgins JP, Jackson D, Barrett JK, et al. Consistency and inconsistency in network meta-analysis: concepts  
24 and models for multi-arm studies. *Res Synth Methods* 2012; 3:98-110.  
25  
26  
27 51. Peters JL, Sutton AJ, Jones DR, et al. Contour-enhanced meta-analysis funnel plots help distinguish  
28 publication bias from other causes of asymmetry. *J Clin Epidemiol* 2008;61:991-6.  
29  
30  
31 52. Salanti G, Ades AE, Ioannidis JP. Graphical methods and numerical summaries for presenting results from  
32 multiple-treatment meta-analysis: an overview and tutorial. *J Clin Epidemiol* 2011; 64: 163-71.  
33  
34  
35 53. Chaimani A, Salanti G. Using network meta-analysis to evaluate the existence of small-study effects in a  
36 network of interventions. *Res Synth Methods* 2012;3:161-76.  
37  
38  
39 54. Salanti G, Del Giovane C, Chaimani A, et al. Evaluating the quality of evidence from a network meta-  
40 analysis. *PLoS One* 2014;9:e99682.  
41  
42  
43  
44  
45  
46  
47  
48  
49  
50  
51  
52  
53  
54  
55  
56  
57  
58  
59  
60

## TABLES

Table 1 Description of Psychotherapeutic interventions and control conditions

| Interventions                          | Abbreviation | Description                                                                                                                                                                                                                                                                                                                                                                                                                               |
|----------------------------------------|--------------|-------------------------------------------------------------------------------------------------------------------------------------------------------------------------------------------------------------------------------------------------------------------------------------------------------------------------------------------------------------------------------------------------------------------------------------------|
| <i>Psychotherapeutic Intervention:</i> |              |                                                                                                                                                                                                                                                                                                                                                                                                                                           |
| Behavioral therapy                     | BT           | BT uses some kind of behavioral training and psychoeducation. BT programs provide parents and youths information about MDD and interventions; teach youths to monitor their mood, thoughts and behaviors; proposed pleasant activity scheduling and behavioral activation.                                                                                                                                                                |
| Cognitive-behavioral therapy           | CBT          | CBT is a combination of BT and CT. Additional CBT skill-building techniques are used in many programs by teaching relaxation techniques to cope with environmental stressors, providing social skills and resolution training, and teaching general problem-solving.                                                                                                                                                                      |
| Cognitive therapy                      | CT           | CT uses some kind of cognitive restructuring training. CT programs ask youths to examine their automatic thoughts and core schemas and to assess the accuracy and affective consequences of their views. They aim to teach youths to engage in "rational" thinking about themselves, the world and their possibilities for the future.                                                                                                    |
| Family therapy                         | FT           | FT works with families to nurture change and development. FT tends to view change in terms of the systems of interaction between family members. In the case of youth with MDD, FT aims at helping the family to answer the child's needs for completing age-appropriate developmental tasks to relieve depression.                                                                                                                       |
| Interpersonal therapy                  | IPT          | IPT aim at educating patients as to how their depression and the quality of interpersonal relationships affect one another and at addressing interpersonal problems that may be contributing to the depression (e.g. grief, disputes, role transitions, social deficits). Compared to its adult version, IPT in youths is shorter, involves parents, and adds a liaison role for the therapist between schools and families.              |
| Play therapy                           | PT           | PT used techniques to engage participants in recreational activities to help them cope with their problems and fears.                                                                                                                                                                                                                                                                                                                     |
| Problem-solving therapy                | PST          | PST focus on the problems participants are currently facing and on helping them find solutions to those problems.                                                                                                                                                                                                                                                                                                                         |
| Psychodynamic therapy                  | DYN          | DYN proposed patients to help understand the origin and nature of long standing problems by investigating both conscious and non-conscious thoughts and emotional feelings. DYN uses free associations and interpretation of dreams (or drawing in children), and addresses how personal history and experience may alter the patient/therapist transference. In youth MDD, a particular interest is given to psychological trauma, early |

parent/child relationships, narcissistic organization and experiences of loss.

Supportive therapy      SUP  
 SUP is an unstructured therapy without specific psychological techniques that it helped people to ventilate their experiences and emotions and offering empathy. These therapies are commonly described in the literature as either counseling or supportive therapy.

***Control conditions:***

No-treatment      NT  
 NT is a control condition in which the participants receive no active treatment during the study and in which they do not expect to receive such after the study is over.

Psychological placebo      PBO  
 PBO is a control condition that was regarded as inactive by the researchers but was to be the participants.

Treatment-as-usual      TAU  
 TAU is not considered to be structured psychotherapy but may have some treatment effects.

Waitlist      WL  
 WL is a control condition in which the participants receive no active treatment during the study but are forewarned that they can receive one after the study period is over.

---

Table 2 Hierarchy of depression symptom severity measurement scales

| Hierarchy | Depression symptom severity measurement scales                              | Abbreviation |
|-----------|-----------------------------------------------------------------------------|--------------|
| 1         | Children's Depression Rating Scale                                          | CDRS         |
| 2         | Hamilton Depression Rating Scale                                            | HAMD         |
| 3         | Montgomery Asberg Depression Rating Scale                                   | MADRS        |
| 4         | Beck Depression Inventory                                                   | BDI          |
| 5         | Children's Depression Inventory                                             | CDI          |
| 6         | Schedule for Affective Disorders and Schizophrenia for School Aged Children | K-SADS       |
| 7         | Mood and Feeling Questionnaire                                              | MFQ          |
| 8         | Reynolds Adolescent Depression Scale                                        | RADS         |
| 9         | Bellevue Index of Depression                                                | BID          |
| 10        | Child Depression Scale                                                      | CDS          |
| 11        | Centre for Epidemiologic Studies Depression Scale                           | CESD         |
| 12        | Child Assessment Schedule                                                   | CAS          |
| 13        | Child Behavior Checklist-Depression                                         | CBCL-D       |

Figure 1. Possible interventions eligible for the ideal network plot

For peer review only

1  
2  
3  
4  
5  
6  
7  
8  
9  
10  
11  
12  
13  
14  
15  
16  
17  
18  
19  
20  
21  
22  
23  
24  
25  
26  
27  
28  
29  
30  
31  
32  
33  
34  
35  
36  
37  
38  
39  
40  
41  
42  
43  
44  
45  
46  
47  
48  
49  
50  
51  
52  
53  
54  
55  
56  
57  
58  
59  
60

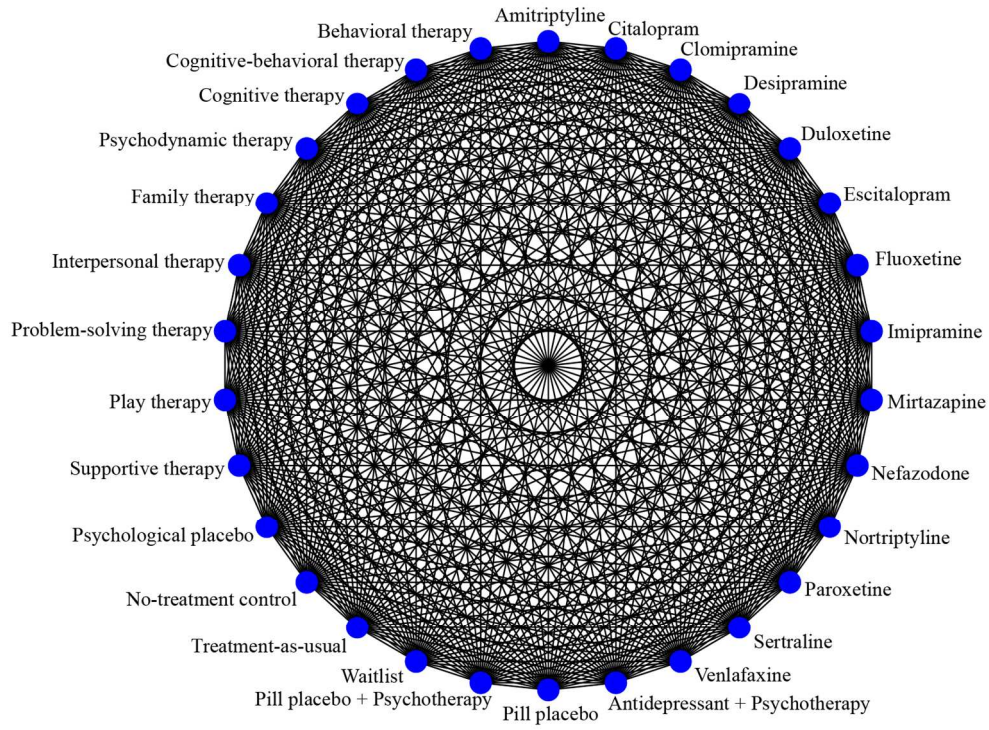

Figure 1. Possible interventions eligible for the ideal network plot

139x102mm (300 x 300 DPI)

Review only



**PRISMA-P (Preferred Reporting Items for Systematic review and Meta-Analysis Protocols) 2015 checklist: recommended items to address in a systematic review protocol\***

| Section and topic                 | Item No | Checklist item                                                                                                                                                                                                                                                                                                                                                                                                                                                                                                                                                                                                                                                                                                                                                                                                                                                                                                                                                                                                                                                                                                                                                                                                                                                                                                                                                                                                                                                                                                                                                                                                                                                                                                                                                                                                                                                                           | Reported on Page # |
|-----------------------------------|---------|------------------------------------------------------------------------------------------------------------------------------------------------------------------------------------------------------------------------------------------------------------------------------------------------------------------------------------------------------------------------------------------------------------------------------------------------------------------------------------------------------------------------------------------------------------------------------------------------------------------------------------------------------------------------------------------------------------------------------------------------------------------------------------------------------------------------------------------------------------------------------------------------------------------------------------------------------------------------------------------------------------------------------------------------------------------------------------------------------------------------------------------------------------------------------------------------------------------------------------------------------------------------------------------------------------------------------------------------------------------------------------------------------------------------------------------------------------------------------------------------------------------------------------------------------------------------------------------------------------------------------------------------------------------------------------------------------------------------------------------------------------------------------------------------------------------------------------------------------------------------------------------|--------------------|
| <b>ADMINISTRATIVE INFORMATION</b> |         |                                                                                                                                                                                                                                                                                                                                                                                                                                                                                                                                                                                                                                                                                                                                                                                                                                                                                                                                                                                                                                                                                                                                                                                                                                                                                                                                                                                                                                                                                                                                                                                                                                                                                                                                                                                                                                                                                          |                    |
| Title:                            |         |                                                                                                                                                                                                                                                                                                                                                                                                                                                                                                                                                                                                                                                                                                                                                                                                                                                                                                                                                                                                                                                                                                                                                                                                                                                                                                                                                                                                                                                                                                                                                                                                                                                                                                                                                                                                                                                                                          |                    |
| Identification                    | 1a      | Comparative efficacy and acceptability of antidepressants, psychological interventions, and their combination for depressive disorder in children and adolescents: protocol for a network meta-analysis                                                                                                                                                                                                                                                                                                                                                                                                                                                                                                                                                                                                                                                                                                                                                                                                                                                                                                                                                                                                                                                                                                                                                                                                                                                                                                                                                                                                                                                                                                                                                                                                                                                                                  | 1                  |
| Update                            | 1b      | None                                                                                                                                                                                                                                                                                                                                                                                                                                                                                                                                                                                                                                                                                                                                                                                                                                                                                                                                                                                                                                                                                                                                                                                                                                                                                                                                                                                                                                                                                                                                                                                                                                                                                                                                                                                                                                                                                     |                    |
| Registration                      | 2       | PROSPERO CRD42015020841                                                                                                                                                                                                                                                                                                                                                                                                                                                                                                                                                                                                                                                                                                                                                                                                                                                                                                                                                                                                                                                                                                                                                                                                                                                                                                                                                                                                                                                                                                                                                                                                                                                                                                                                                                                                                                                                  | 4                  |
| Authors:                          |         |                                                                                                                                                                                                                                                                                                                                                                                                                                                                                                                                                                                                                                                                                                                                                                                                                                                                                                                                                                                                                                                                                                                                                                                                                                                                                                                                                                                                                                                                                                                                                                                                                                                                                                                                                                                                                                                                                          |                    |
| Contact                           | 3a      | Xinyu Zhou, Yuqing Zhang, Juncai Pu, Lining Yang, Peng Xie (Department of Neurology and Psychiatry, The First Affiliated Hospital of Chongqing Medical University, Chongqing, China; Institute of Neuroscience and the Collaborative Innovation Center for Brain Science, Chongqing Medical University, Chongqing, China)<br>Andrea Cipriani (Department of Psychiatry, University of Oxford, Warneford Hospital, Oxford, UK)<br>Pim Cuijpers (Department of Clinical, Neuro and Developmental Psychology, Amsterdam Public Health research institute, Vrije Universiteit Amsterdam, The Netherlands)<br>Sarah E. Hetrick (Orygen, The National Centre of Excellence in Youth Mental Health, and the Centre of Youth Mental Health, University of Melbourne, Melbourne, Australia)<br>John R. Weisz (Department of Psychology, Harvard University, Cambridge, MA, USA)<br>Cinzia Del Giovane (Department of Diagnostic, Clinical and Public Health Medicine, University of Modena and Reggio Emilia, Modena, Italy)<br>Toshiaki A. Furukawa (Department of Health Promotion and Human Behavior, Kyoto University Graduate School of Medicine and School of Public Health, Kyoto, Japan)<br>Jürgen Barth (Institute of Complementary and Integrative Medicine, University Hospital and University of Zurich, Zurich, Switzerland)<br>David Coghill (Departments of Paediatrics and Psychiatry, University of Melbourne, Melbourne, Australia)<br>Stefan Leucht (Department of Psychiatry and Psychotherapy, Technische Universität München, Munich, Germany)<br>Arun V Ravindran (Department of Psychiatry, University of Toronto, Toronto, ON, Canada)<br><br>Corresponding author :Peng Xie, Department of Neurology and Psychiatry, The First Affiliated Hospital of Chongqing Medical University, 1 Youyi Road, Yuzhong District, Chongqing 400016, China; E-mail: xiepeng973@126.com | 1-2                |
| Contributions                     | 3b      | PX, AC, and XZ conceived the study and drafted the protocol. PX, AC and XZ wrote the first draft of the manuscript. PC, SEH, JRW, CDG, TAF, JB, DC, AVR assisted in protocol design and revision. XZ, YZ, and LY participated in the search strategy                                                                                                                                                                                                                                                                                                                                                                                                                                                                                                                                                                                                                                                                                                                                                                                                                                                                                                                                                                                                                                                                                                                                                                                                                                                                                                                                                                                                                                                                                                                                                                                                                                     | 17                 |



development. CDG, and JP participated in the design of data synthesis and analysis. All the authors have approved the publication of the protocol.

Amendments 4 None

Support:

Sources 5a ational Basic Research Program of China (973 Program) (Grant No. 2009CB918300)

Sponsor 5b This work is supported by the National Basic Research Program of China (973 Program) (Grant No. 2009CB918300).

Role of sponsor or funder 5c The funders had no role in the protocol design; the writing of the protocol; or the decision to submit the protocol for publication.

## INTRODUCTION

Rationale 6 Depressive disorder in children and adolescents is a major public health problem. The course of depressive disorder in young people is often characterised by protracted episodes, frequent recurrence, and comorbid psychiatric disorders. Several clinical practice guidelines recommend that in children and adolescents, psychotherapy should be considered as the first-line intervention for the management of depressive disorder, while pharmacological treatments are often reserved for more severe illness or when psychotherapy does not work or is not available. Nevertheless, the evidence-base for psychotherapy to be more effective and safer than antidepressants in the treatment of child and adolescent depressive disorder is not well established. In our two previous network meta-analyses the comparative efficacy and acceptability of psychotherapies and antidepressants for depressive disorder in children and adolescents have been separately investigated 6

Objectives 7 The aim of the current protocol is to synthesise all this evidence and provide clinicians with a reliable treatment algorithm of the commonly used psychological, and pharmacological interventions, as well as their combinations for the acute treatment of depressive disorder in children and adolescents. 7

## METHODS

Eligibility criteria 8 **Types of participants**  
We will include studies that enrolled participants aged less than 18 years of age when they are initially enrolled in the studies, of both sexes with a diagnosis of depressive disorder based on standardised diagnostic criteria (e.g., the Diagnostic and Statistical Manual of Mental Disorders or the International Classification of Diseases). While it is accepted that subclinical depression still has a significant impact on an individuals' social and educational functioning, we will not include studies of this population. Similarly, studies where depressive disorder was not formally diagnosed will also be excluded for the same rationale that its clinical heterogeneity could violate the transitivity assumption in NMA (i.e. one can compare indirectly intervention B and C via intervention A). We will also exclude trials in which participants are described as having psychotic depression or treatment-resistant depression, as their treatment response differs from patients without treatment resistance or symptoms of psychosis. Trials focusing on child or adolescent bipolar disorder will also be excluded, but not those involving patients with other comorbid psychiatric disorders (e.g., anxiety disorder). Where a study includes both adults and children/adolescents and the randomisation had been stratified according this variable, the data will be included if data on the depressed youths can be separately extracted from the manuscript, or can be obtained from the authors. Studies conducted in both inpatient and outpatient settings will be included. RCTs recruiting participants with an overall sample size of fewer than ten patients will be excluded. 7-10

---

### Types of studies

Any randomised controlled trials (RCTs), including the first phase of cross-over trials as well as cluster-randomised trials, will be included. Quasi-randomised trials (e.g., those allocating participants using alternate days of the week) will be excluded. For trials of antidepressants alone, only double-blind RCTs (patients and raters blinded) will be included. As it is difficult to utilise a double-blind design for patients in trials of psychotherapy alone or the combination of antidepressant and psychotherapy, we will only include trials in which raters were blinded or participants were assessed by self-rating depression scales.

### Types of interventions

For pharmacological interventions, we will include any commonly prescribed oral antidepressants (fixed or flexible doses). These will include tricyclic antidepressants (TCAs; amitriptyline, clomipramine, nortriptyline, desipramine, imipramine, etc.), selective serotonin reuptake inhibitors (SSRIs; escitalopram, fluoxetine, paroxetine, sertraline, etc.), and serotonin-norepinephrine reuptake inhibitors (SNRIs; venlafaxine, duloxetine), as well as novel agents mirtazapine and nefazodone. In terms of psychological interventions, we will include any manualised or structured psychotherapies, e.g., behavioral therapy, cognitive-behavioral therapy, cognitive therapy, family therapy, interpersonal therapy, play therapy, problem-solving therapy, psychodynamic therapy, and supportive therapy. Also, we will include the combination of both psychological interventions and pharmacological interventions. For the pharmacological interventions, the control condition always is pill placebo, and these for psychological control conditions will include waiting-list (WL), treatment as usual (TAU), psychological placebo or attention placebo, as well as no-treatment (NT). All RCTs comparing any active intervention (psychological interventions, pharmacological interventions, or their combinations) with either active comparators or control conditions for acute treatment of depressive disorder in children and adolescents will be included. The acute phase will be defined as from 4 to 16 week. We will exclude trials with treatment duration of less than 4 weeks, because the onset of benefit for most antidepressants often takes at least 4 weeks. If a study present data for more than one time point within our pre-defined acute phase window or beyond 16 weeks, the 8-week (or the closest to 8-week) will be taken as the time. Trials comparing the same antidepressant at different therapeutic doses will be merged in the same node in the network analysis so long as they are within the dose range licensed by drug regulatory agencies. Also, trials comparing the same type of psychological interventions but at different numbers of therapeutic sessions, different delivery format (group, individual), different treatment medium (face-to-face, internet-based), and different treatment conditions (with or without family involvement) will be considered as the same node in the network analysis. We anticipate that any patient who meets all inclusion criteria, in principal, is equally likely to be randomised to any of the interventions in the synthesis comparator set.

### Types of outcome measures

#### Primary outcomes

- (1) Efficacy (as a continuous outcome), measured by the overall mean change scores on depressive symptom scales (self- or assessor-rated), e.g., Children's Depression Rating Scale (CDRS-R) and Hamilton Depression Rating Scale (HAMD) from baseline to endpoint.
- (2) Acceptability of treatment, defined as the proportion of patients who drop out of the study by any cause during the delivery of the intervention.

#### Secondary outcomes

---

1  
2  
3  
4  
5  
6  
7  
8  
9  
10  
11  
12  
13  
14  
15  
16  
17  
18  
19  
20  
21  
22  
23  
24  
25  
26  
27  
28  
29  
30  
31  
32  
33  
34  
35  
36  
37  
38  
39  
40  
41  
42  
43  
44  
45  
46  
47  
48  
49

---

(1) Efficacy (as dichotomous outcome), measured by the total number of patients who achieved the criteria of remission, defined as being below the threshold in depression rating score (e.g., less than 28 for CDRS-R), while these thresholds are different across trials.

(2) Tolerability of treatment, defined as the proportion of patients who discontinued treatment due to any adverse events during the delivery of the intervention.

(3) Suicide-related outcome, estimated by the reported cases of definitive suicidal behavior or suicidal ideation during the acute phase of treatment. The definition of suicide-related outcome is based on the Columbia Classification Algorithm of Suicide Assessment (C-CASA). For the antidepressants trials, the data on suicidality mainly referred to the Columbia re-analysis data reported in the FDA report. If trials are not included in this report, we will attempt to extract the data on suicide-related outcome from the Medicines and Healthcare products Regulatory Agency database or the pharmaceutical company website. For the psychological trials and the combination trials, we will mainly extract the data on suicidality from original text, and from related reviews.

(4) Global functional improvement, estimated by overall change scores on global assessment of functioning scales, e.g., Children's Global Assessment Scale (CGAS) and Global Assessment of Functioning Scale (GAF), or quality of life scales, e.g., Quality of Life Enjoyment and Satisfaction Questionnaire (Q-LES-Q). When data are reported on more than one measure, we will first chose data from the CGAS, then the GAF, and finally the Q-LES-Q and others.

---

|                     |   |                                                                                                                                                                                                                                                                                                                                                                                                                                                                                                                                                                                                                                                                                                                                                                                                                                                                                                                                                                                                                                                                                                                                                                                                                                                                                                                                                                                                                                                                                                                                                                                                                                                                                        |       |
|---------------------|---|----------------------------------------------------------------------------------------------------------------------------------------------------------------------------------------------------------------------------------------------------------------------------------------------------------------------------------------------------------------------------------------------------------------------------------------------------------------------------------------------------------------------------------------------------------------------------------------------------------------------------------------------------------------------------------------------------------------------------------------------------------------------------------------------------------------------------------------------------------------------------------------------------------------------------------------------------------------------------------------------------------------------------------------------------------------------------------------------------------------------------------------------------------------------------------------------------------------------------------------------------------------------------------------------------------------------------------------------------------------------------------------------------------------------------------------------------------------------------------------------------------------------------------------------------------------------------------------------------------------------------------------------------------------------------------------|-------|
| Information sources | 9 | For the identification of trials of antidepressant and psychotherapy alone for depressive disorder in children and adolescents, we will update the literature search of our two previous network meta-analyses. <sup>8,10</sup> Other eligible trials of the combinations of antidepressant and psychotherapy will be identified by searching PubMed, EMBASE, CENTRAL (Cochrane Central Register of Controlled Trials), Web of Science, PsycINFO, ProQuest, CINAHL, LiLACS from date of inception with Medical Subject Headings (MeSH) and text words. We will also search ClinicalTrials.gov in USA and other international trial registers via the International Clinical Trials Registry Platform (ICTRP) in WHO. We will also check relevant reports on the US Food and Drug Administration (FDA) website, and hand-search key journals, conference proceedings, such as, J Child Adolesc Psychopharmacol, J Am Acad Child Adolesc Psychiatry, Child Adolesc Psychiatry Ment Health, Psychopharmacol Bull, Arch Gen Psychiatry, Am J Psychiatry, Eur Psychiatry, Depress Anxiety. There will be no restrictions on language, or publication year. Additional relevant studies will be obtained by scanning reference lists of trials identified in the initial searches and relevant review papers. We will also inquire at the relative pharmaceutical companies (e.g., GlaxoSmithKline, Lilly, Organon, Forest Pharmaceuticals, Bristol-Myers Squibb) and search their websites for unpublished data. All relevant experts and principal manufacturers will be contacted to supplement incomplete reports of the original papers or to provide new data for unpublished studies. | 11-12 |
|---------------------|---|----------------------------------------------------------------------------------------------------------------------------------------------------------------------------------------------------------------------------------------------------------------------------------------------------------------------------------------------------------------------------------------------------------------------------------------------------------------------------------------------------------------------------------------------------------------------------------------------------------------------------------------------------------------------------------------------------------------------------------------------------------------------------------------------------------------------------------------------------------------------------------------------------------------------------------------------------------------------------------------------------------------------------------------------------------------------------------------------------------------------------------------------------------------------------------------------------------------------------------------------------------------------------------------------------------------------------------------------------------------------------------------------------------------------------------------------------------------------------------------------------------------------------------------------------------------------------------------------------------------------------------------------------------------------------------------|-------|

---

|                 |    |                                                                                                                                                                                                                                                                                                                                                                                                                                                                                                                                                                                                                                                                                                                                                                                                                                 |    |
|-----------------|----|---------------------------------------------------------------------------------------------------------------------------------------------------------------------------------------------------------------------------------------------------------------------------------------------------------------------------------------------------------------------------------------------------------------------------------------------------------------------------------------------------------------------------------------------------------------------------------------------------------------------------------------------------------------------------------------------------------------------------------------------------------------------------------------------------------------------------------|----|
| Search strategy | 10 | (depress* or dysthymi* or mood disorder* or affective disorder*) and (adolesc* or child* or boy* or girl* or juvenil* or minors or paediatric* or pediatri* or pubescen* or school* or student* or teen* or young or youth*) and (“selective serotonin reuptake inhibitor*” or SSRIs or “serotonin norepinephrine reuptake inhibitor*” or SNRIs or citalopram or fluoxetine or paroxetine or sertraline or escitalopram or fluvoxamine or venlafaxine or duloxetine “noradrenergic and specific serotonergic antidepressants” or NaSSA or mirtazapine or TCA or tricyclic or amitriptyline or clomipramine or desipramine or imipramine or nortriptyline) and (psychotherapy* or behavio* or “family therap*” or CBT or cognitive or interpersonal or IPT or “play therap*” or supportive or problem-solving or psychodynamic). | 11 |
|-----------------|----|---------------------------------------------------------------------------------------------------------------------------------------------------------------------------------------------------------------------------------------------------------------------------------------------------------------------------------------------------------------------------------------------------------------------------------------------------------------------------------------------------------------------------------------------------------------------------------------------------------------------------------------------------------------------------------------------------------------------------------------------------------------------------------------------------------------------------------|----|

---

Study records:

---

|    |                             |     |                                                                                                                                                                                                                                                                                                                                                                                                                                                                                                                                                                                                                                                                                                                                                                                                                                                                                                                                                                                                                                                                                                                                                                                                                                                                                                                                                                                                                                                                                                                                                                                                                                                                                                                                                                                                                                                                                                                                                                                                                                                                                                                                       |       |
|----|-----------------------------|-----|---------------------------------------------------------------------------------------------------------------------------------------------------------------------------------------------------------------------------------------------------------------------------------------------------------------------------------------------------------------------------------------------------------------------------------------------------------------------------------------------------------------------------------------------------------------------------------------------------------------------------------------------------------------------------------------------------------------------------------------------------------------------------------------------------------------------------------------------------------------------------------------------------------------------------------------------------------------------------------------------------------------------------------------------------------------------------------------------------------------------------------------------------------------------------------------------------------------------------------------------------------------------------------------------------------------------------------------------------------------------------------------------------------------------------------------------------------------------------------------------------------------------------------------------------------------------------------------------------------------------------------------------------------------------------------------------------------------------------------------------------------------------------------------------------------------------------------------------------------------------------------------------------------------------------------------------------------------------------------------------------------------------------------------------------------------------------------------------------------------------------------------|-------|
| 1  |                             |     |                                                                                                                                                                                                                                                                                                                                                                                                                                                                                                                                                                                                                                                                                                                                                                                                                                                                                                                                                                                                                                                                                                                                                                                                                                                                                                                                                                                                                                                                                                                                                                                                                                                                                                                                                                                                                                                                                                                                                                                                                                                                                                                                       |       |
| 2  |                             |     |                                                                                                                                                                                                                                                                                                                                                                                                                                                                                                                                                                                                                                                                                                                                                                                                                                                                                                                                                                                                                                                                                                                                                                                                                                                                                                                                                                                                                                                                                                                                                                                                                                                                                                                                                                                                                                                                                                                                                                                                                                                                                                                                       |       |
| 3  |                             |     |                                                                                                                                                                                                                                                                                                                                                                                                                                                                                                                                                                                                                                                                                                                                                                                                                                                                                                                                                                                                                                                                                                                                                                                                                                                                                                                                                                                                                                                                                                                                                                                                                                                                                                                                                                                                                                                                                                                                                                                                                                                                                                                                       |       |
| 4  |                             |     |                                                                                                                                                                                                                                                                                                                                                                                                                                                                                                                                                                                                                                                                                                                                                                                                                                                                                                                                                                                                                                                                                                                                                                                                                                                                                                                                                                                                                                                                                                                                                                                                                                                                                                                                                                                                                                                                                                                                                                                                                                                                                                                                       |       |
| 5  | Data management             | 11a | Literature search results will be imported to Endnote and the duplicates will be removed during the study selection process. We will screening citations based on the inclusion and exclusion criteria.                                                                                                                                                                                                                                                                                                                                                                                                                                                                                                                                                                                                                                                                                                                                                                                                                                                                                                                                                                                                                                                                                                                                                                                                                                                                                                                                                                                                                                                                                                                                                                                                                                                                                                                                                                                                                                                                                                                               | 12    |
| 6  |                             |     |                                                                                                                                                                                                                                                                                                                                                                                                                                                                                                                                                                                                                                                                                                                                                                                                                                                                                                                                                                                                                                                                                                                                                                                                                                                                                                                                                                                                                                                                                                                                                                                                                                                                                                                                                                                                                                                                                                                                                                                                                                                                                                                                       |       |
| 7  | Selection process           | 11b | Titles and abstracts identified from the search strategies will be independently examined by two reviewers (XZ and YZ). If both reviewers judge that the trial does not meet eligibility criteria, we will exclude it. Then, we will obtain the full-texts of all remaining articles and determine whether to include them according to inclusion criteria described above. We will calculate the inter-rater reliability of the two raters. Any disagreements will be resolved by a third review author (AC or PX) or by consultation with the authors of the articles. The reasons for exclusion of trials will be reported in the characteristics of excluded studies list.                                                                                                                                                                                                                                                                                                                                                                                                                                                                                                                                                                                                                                                                                                                                                                                                                                                                                                                                                                                                                                                                                                                                                                                                                                                                                                                                                                                                                                                        | 12    |
| 8  |                             |     |                                                                                                                                                                                                                                                                                                                                                                                                                                                                                                                                                                                                                                                                                                                                                                                                                                                                                                                                                                                                                                                                                                                                                                                                                                                                                                                                                                                                                                                                                                                                                                                                                                                                                                                                                                                                                                                                                                                                                                                                                                                                                                                                       |       |
| 9  |                             |     |                                                                                                                                                                                                                                                                                                                                                                                                                                                                                                                                                                                                                                                                                                                                                                                                                                                                                                                                                                                                                                                                                                                                                                                                                                                                                                                                                                                                                                                                                                                                                                                                                                                                                                                                                                                                                                                                                                                                                                                                                                                                                                                                       |       |
| 10 |                             |     |                                                                                                                                                                                                                                                                                                                                                                                                                                                                                                                                                                                                                                                                                                                                                                                                                                                                                                                                                                                                                                                                                                                                                                                                                                                                                                                                                                                                                                                                                                                                                                                                                                                                                                                                                                                                                                                                                                                                                                                                                                                                                                                                       |       |
| 11 |                             |     |                                                                                                                                                                                                                                                                                                                                                                                                                                                                                                                                                                                                                                                                                                                                                                                                                                                                                                                                                                                                                                                                                                                                                                                                                                                                                                                                                                                                                                                                                                                                                                                                                                                                                                                                                                                                                                                                                                                                                                                                                                                                                                                                       |       |
| 12 | Data collection process     | 11c | Two independent reviewers (XZ and YZ) will extract the data from each included trial using standardised data extraction forms. We will assess and report the reliability of the reviewers' data extraction on each coded variable. Any disagreements will be resolved by a third review author (AC or PX). Where necessary, the authors of the studies will be contacted for further information.                                                                                                                                                                                                                                                                                                                                                                                                                                                                                                                                                                                                                                                                                                                                                                                                                                                                                                                                                                                                                                                                                                                                                                                                                                                                                                                                                                                                                                                                                                                                                                                                                                                                                                                                     | 12-13 |
| 13 |                             |     |                                                                                                                                                                                                                                                                                                                                                                                                                                                                                                                                                                                                                                                                                                                                                                                                                                                                                                                                                                                                                                                                                                                                                                                                                                                                                                                                                                                                                                                                                                                                                                                                                                                                                                                                                                                                                                                                                                                                                                                                                                                                                                                                       |       |
| 14 | Data items                  | 12  | Study characteristics (e.g., first listed author, publication year, title, publication type, publication journal, country, and sponsor), patient characteristics (e.g., diagnostic criteria, comorbidities, the age of patients, patient setting, the number of patients, the gender of patients, and severity of depression at baseline), intervention details (e.g., the type of intervention, the treatment duration, the dose of antidepressant agent, the length and number of sessions of psychotherapy, treatment delivery and treatment medium of psychotherapy) and outcome measures (primary outcomes and secondary outcomes).                                                                                                                                                                                                                                                                                                                                                                                                                                                                                                                                                                                                                                                                                                                                                                                                                                                                                                                                                                                                                                                                                                                                                                                                                                                                                                                                                                                                                                                                                              | 12    |
| 15 |                             |     |                                                                                                                                                                                                                                                                                                                                                                                                                                                                                                                                                                                                                                                                                                                                                                                                                                                                                                                                                                                                                                                                                                                                                                                                                                                                                                                                                                                                                                                                                                                                                                                                                                                                                                                                                                                                                                                                                                                                                                                                                                                                                                                                       |       |
| 16 |                             |     |                                                                                                                                                                                                                                                                                                                                                                                                                                                                                                                                                                                                                                                                                                                                                                                                                                                                                                                                                                                                                                                                                                                                                                                                                                                                                                                                                                                                                                                                                                                                                                                                                                                                                                                                                                                                                                                                                                                                                                                                                                                                                                                                       |       |
| 17 |                             |     |                                                                                                                                                                                                                                                                                                                                                                                                                                                                                                                                                                                                                                                                                                                                                                                                                                                                                                                                                                                                                                                                                                                                                                                                                                                                                                                                                                                                                                                                                                                                                                                                                                                                                                                                                                                                                                                                                                                                                                                                                                                                                                                                       |       |
| 18 |                             |     |                                                                                                                                                                                                                                                                                                                                                                                                                                                                                                                                                                                                                                                                                                                                                                                                                                                                                                                                                                                                                                                                                                                                                                                                                                                                                                                                                                                                                                                                                                                                                                                                                                                                                                                                                                                                                                                                                                                                                                                                                                                                                                                                       |       |
| 19 |                             |     |                                                                                                                                                                                                                                                                                                                                                                                                                                                                                                                                                                                                                                                                                                                                                                                                                                                                                                                                                                                                                                                                                                                                                                                                                                                                                                                                                                                                                                                                                                                                                                                                                                                                                                                                                                                                                                                                                                                                                                                                                                                                                                                                       |       |
| 20 | Outcomes and prioritization | 13  | Primary outcomes<br>(1) Efficacy (as a continuous outcome), measured by the overall mean change scores on depressive symptom scales (self- or assessor-rated), e.g., Children's Depression Rating Scale (CDRS-R) and Hamilton Depression Rating Scale (HAMD) from baseline to endpoint.<br>(2) Acceptability of treatment, defined as the proportion of patients who drop out of the study by any cause during the delivery of the intervention.<br>Secondary outcomes<br>(1) Efficacy (as dichotomous outcome), measured by the total number of patients who achieved the criteria of remission, defined as being below the threshold in depression rating score (e.g., less than 28 for CDRS-R), while these thresholds are different across trials.<br>(2) Tolerability of treatment, defined as the proportion of patients who discontinued treatment due to any adverse events during the delivery of the intervention.<br>(3) Suicide-related outcome, estimated by the reported cases of definitive suicidal behavior or suicidal ideation during the acute phase of treatment. The definition of suicide-related outcome is based on the Columbia Classification Algorithm of Suicide Assessment (C-CASA). For the antidepressants trials, the data on suicidality mainly referred to the Columbia re-analysis data reported in the FDA report. If trials are not included in this report, we will attempt to extract the data on suicide-related outcome from the Medicines and Healthcare products Regulatory Agency database or the pharmaceutical company website. For the psychological trials and the combination trials, we will mainly extract the data on suicidality from original text, and from related reviews.<br>(4) Global functional improvement, estimated by overall change scores on global assessment of functioning scales, e.g., Children's Global Assessment Scale (CGAS) and Global Assessment of Functioning Scale (GAF), or quality of life scales, e.g., Quality of Life Enjoyment and Satisfaction Questionnaire (Q-LES-Q). When data are reported on more than one measure, we will first chose | 10-11 |
| 21 |                             |     |                                                                                                                                                                                                                                                                                                                                                                                                                                                                                                                                                                                                                                                                                                                                                                                                                                                                                                                                                                                                                                                                                                                                                                                                                                                                                                                                                                                                                                                                                                                                                                                                                                                                                                                                                                                                                                                                                                                                                                                                                                                                                                                                       |       |
| 22 |                             |     |                                                                                                                                                                                                                                                                                                                                                                                                                                                                                                                                                                                                                                                                                                                                                                                                                                                                                                                                                                                                                                                                                                                                                                                                                                                                                                                                                                                                                                                                                                                                                                                                                                                                                                                                                                                                                                                                                                                                                                                                                                                                                                                                       |       |
| 23 |                             |     |                                                                                                                                                                                                                                                                                                                                                                                                                                                                                                                                                                                                                                                                                                                                                                                                                                                                                                                                                                                                                                                                                                                                                                                                                                                                                                                                                                                                                                                                                                                                                                                                                                                                                                                                                                                                                                                                                                                                                                                                                                                                                                                                       |       |
| 24 |                             |     |                                                                                                                                                                                                                                                                                                                                                                                                                                                                                                                                                                                                                                                                                                                                                                                                                                                                                                                                                                                                                                                                                                                                                                                                                                                                                                                                                                                                                                                                                                                                                                                                                                                                                                                                                                                                                                                                                                                                                                                                                                                                                                                                       |       |
| 25 |                             |     |                                                                                                                                                                                                                                                                                                                                                                                                                                                                                                                                                                                                                                                                                                                                                                                                                                                                                                                                                                                                                                                                                                                                                                                                                                                                                                                                                                                                                                                                                                                                                                                                                                                                                                                                                                                                                                                                                                                                                                                                                                                                                                                                       |       |
| 26 |                             |     |                                                                                                                                                                                                                                                                                                                                                                                                                                                                                                                                                                                                                                                                                                                                                                                                                                                                                                                                                                                                                                                                                                                                                                                                                                                                                                                                                                                                                                                                                                                                                                                                                                                                                                                                                                                                                                                                                                                                                                                                                                                                                                                                       |       |
| 27 |                             |     |                                                                                                                                                                                                                                                                                                                                                                                                                                                                                                                                                                                                                                                                                                                                                                                                                                                                                                                                                                                                                                                                                                                                                                                                                                                                                                                                                                                                                                                                                                                                                                                                                                                                                                                                                                                                                                                                                                                                                                                                                                                                                                                                       |       |
| 28 |                             |     |                                                                                                                                                                                                                                                                                                                                                                                                                                                                                                                                                                                                                                                                                                                                                                                                                                                                                                                                                                                                                                                                                                                                                                                                                                                                                                                                                                                                                                                                                                                                                                                                                                                                                                                                                                                                                                                                                                                                                                                                                                                                                                                                       |       |
| 29 |                             |     |                                                                                                                                                                                                                                                                                                                                                                                                                                                                                                                                                                                                                                                                                                                                                                                                                                                                                                                                                                                                                                                                                                                                                                                                                                                                                                                                                                                                                                                                                                                                                                                                                                                                                                                                                                                                                                                                                                                                                                                                                                                                                                                                       |       |
| 30 |                             |     |                                                                                                                                                                                                                                                                                                                                                                                                                                                                                                                                                                                                                                                                                                                                                                                                                                                                                                                                                                                                                                                                                                                                                                                                                                                                                                                                                                                                                                                                                                                                                                                                                                                                                                                                                                                                                                                                                                                                                                                                                                                                                                                                       |       |
| 31 |                             |     |                                                                                                                                                                                                                                                                                                                                                                                                                                                                                                                                                                                                                                                                                                                                                                                                                                                                                                                                                                                                                                                                                                                                                                                                                                                                                                                                                                                                                                                                                                                                                                                                                                                                                                                                                                                                                                                                                                                                                                                                                                                                                                                                       |       |
| 32 |                             |     |                                                                                                                                                                                                                                                                                                                                                                                                                                                                                                                                                                                                                                                                                                                                                                                                                                                                                                                                                                                                                                                                                                                                                                                                                                                                                                                                                                                                                                                                                                                                                                                                                                                                                                                                                                                                                                                                                                                                                                                                                                                                                                                                       |       |
| 33 |                             |     |                                                                                                                                                                                                                                                                                                                                                                                                                                                                                                                                                                                                                                                                                                                                                                                                                                                                                                                                                                                                                                                                                                                                                                                                                                                                                                                                                                                                                                                                                                                                                                                                                                                                                                                                                                                                                                                                                                                                                                                                                                                                                                                                       |       |
| 34 |                             |     |                                                                                                                                                                                                                                                                                                                                                                                                                                                                                                                                                                                                                                                                                                                                                                                                                                                                                                                                                                                                                                                                                                                                                                                                                                                                                                                                                                                                                                                                                                                                                                                                                                                                                                                                                                                                                                                                                                                                                                                                                                                                                                                                       |       |
| 35 |                             |     |                                                                                                                                                                                                                                                                                                                                                                                                                                                                                                                                                                                                                                                                                                                                                                                                                                                                                                                                                                                                                                                                                                                                                                                                                                                                                                                                                                                                                                                                                                                                                                                                                                                                                                                                                                                                                                                                                                                                                                                                                                                                                                                                       |       |
| 36 |                             |     |                                                                                                                                                                                                                                                                                                                                                                                                                                                                                                                                                                                                                                                                                                                                                                                                                                                                                                                                                                                                                                                                                                                                                                                                                                                                                                                                                                                                                                                                                                                                                                                                                                                                                                                                                                                                                                                                                                                                                                                                                                                                                                                                       |       |
| 37 |                             |     |                                                                                                                                                                                                                                                                                                                                                                                                                                                                                                                                                                                                                                                                                                                                                                                                                                                                                                                                                                                                                                                                                                                                                                                                                                                                                                                                                                                                                                                                                                                                                                                                                                                                                                                                                                                                                                                                                                                                                                                                                                                                                                                                       |       |
| 38 |                             |     |                                                                                                                                                                                                                                                                                                                                                                                                                                                                                                                                                                                                                                                                                                                                                                                                                                                                                                                                                                                                                                                                                                                                                                                                                                                                                                                                                                                                                                                                                                                                                                                                                                                                                                                                                                                                                                                                                                                                                                                                                                                                                                                                       |       |
| 39 |                             |     |                                                                                                                                                                                                                                                                                                                                                                                                                                                                                                                                                                                                                                                                                                                                                                                                                                                                                                                                                                                                                                                                                                                                                                                                                                                                                                                                                                                                                                                                                                                                                                                                                                                                                                                                                                                                                                                                                                                                                                                                                                                                                                                                       |       |
| 40 |                             |     |                                                                                                                                                                                                                                                                                                                                                                                                                                                                                                                                                                                                                                                                                                                                                                                                                                                                                                                                                                                                                                                                                                                                                                                                                                                                                                                                                                                                                                                                                                                                                                                                                                                                                                                                                                                                                                                                                                                                                                                                                                                                                                                                       |       |
| 41 |                             |     |                                                                                                                                                                                                                                                                                                                                                                                                                                                                                                                                                                                                                                                                                                                                                                                                                                                                                                                                                                                                                                                                                                                                                                                                                                                                                                                                                                                                                                                                                                                                                                                                                                                                                                                                                                                                                                                                                                                                                                                                                                                                                                                                       |       |
| 42 |                             |     |                                                                                                                                                                                                                                                                                                                                                                                                                                                                                                                                                                                                                                                                                                                                                                                                                                                                                                                                                                                                                                                                                                                                                                                                                                                                                                                                                                                                                                                                                                                                                                                                                                                                                                                                                                                                                                                                                                                                                                                                                                                                                                                                       |       |
| 43 |                             |     |                                                                                                                                                                                                                                                                                                                                                                                                                                                                                                                                                                                                                                                                                                                                                                                                                                                                                                                                                                                                                                                                                                                                                                                                                                                                                                                                                                                                                                                                                                                                                                                                                                                                                                                                                                                                                                                                                                                                                                                                                                                                                                                                       |       |
| 44 |                             |     |                                                                                                                                                                                                                                                                                                                                                                                                                                                                                                                                                                                                                                                                                                                                                                                                                                                                                                                                                                                                                                                                                                                                                                                                                                                                                                                                                                                                                                                                                                                                                                                                                                                                                                                                                                                                                                                                                                                                                                                                                                                                                                                                       |       |
| 45 |                             |     |                                                                                                                                                                                                                                                                                                                                                                                                                                                                                                                                                                                                                                                                                                                                                                                                                                                                                                                                                                                                                                                                                                                                                                                                                                                                                                                                                                                                                                                                                                                                                                                                                                                                                                                                                                                                                                                                                                                                                                                                                                                                                                                                       |       |
| 46 |                             |     |                                                                                                                                                                                                                                                                                                                                                                                                                                                                                                                                                                                                                                                                                                                                                                                                                                                                                                                                                                                                                                                                                                                                                                                                                                                                                                                                                                                                                                                                                                                                                                                                                                                                                                                                                                                                                                                                                                                                                                                                                                                                                                                                       |       |
| 47 |                             |     |                                                                                                                                                                                                                                                                                                                                                                                                                                                                                                                                                                                                                                                                                                                                                                                                                                                                                                                                                                                                                                                                                                                                                                                                                                                                                                                                                                                                                                                                                                                                                                                                                                                                                                                                                                                                                                                                                                                                                                                                                                                                                                                                       |       |
| 48 |                             |     |                                                                                                                                                                                                                                                                                                                                                                                                                                                                                                                                                                                                                                                                                                                                                                                                                                                                                                                                                                                                                                                                                                                                                                                                                                                                                                                                                                                                                                                                                                                                                                                                                                                                                                                                                                                                                                                                                                                                                                                                                                                                                                                                       |       |
| 49 |                             |     |                                                                                                                                                                                                                                                                                                                                                                                                                                                                                                                                                                                                                                                                                                                                                                                                                                                                                                                                                                                                                                                                                                                                                                                                                                                                                                                                                                                                                                                                                                                                                                                                                                                                                                                                                                                                                                                                                                                                                                                                                                                                                                                                       |       |

|                                    |     |                                                                                                                                                                                                                                                                                                                                                                                                                                                                                                                                                                                                                                                                                                                                                                                                                                                                                                                                                                                                                                                                                                                                                                                                                                                                                                                                                                                                                                                                                                                                                                                                                                                                                                                                                                                                                                                                                                                                                                                                                                                                                                                                                                                                         |       |
|------------------------------------|-----|---------------------------------------------------------------------------------------------------------------------------------------------------------------------------------------------------------------------------------------------------------------------------------------------------------------------------------------------------------------------------------------------------------------------------------------------------------------------------------------------------------------------------------------------------------------------------------------------------------------------------------------------------------------------------------------------------------------------------------------------------------------------------------------------------------------------------------------------------------------------------------------------------------------------------------------------------------------------------------------------------------------------------------------------------------------------------------------------------------------------------------------------------------------------------------------------------------------------------------------------------------------------------------------------------------------------------------------------------------------------------------------------------------------------------------------------------------------------------------------------------------------------------------------------------------------------------------------------------------------------------------------------------------------------------------------------------------------------------------------------------------------------------------------------------------------------------------------------------------------------------------------------------------------------------------------------------------------------------------------------------------------------------------------------------------------------------------------------------------------------------------------------------------------------------------------------------------|-------|
|                                    |     | data from the CGAS, then the GAF, and finally the Q-LES-Q and others.<br>Where depression symptoms are measured using more than one depression scale in a trial, we will extract data from the depressive scales on the basis of a hierarchy of rating scales. The hierarchy will be based on psychometric properties and appropriateness for use with children and adolescents and for consistency of use across trials (referred from the Zhou et al study). We will also establish a hierarchy of informants of depressive rating scales, with the clinician report first in the hierarchy, and then the child or adolescent self-report.                                                                                                                                                                                                                                                                                                                                                                                                                                                                                                                                                                                                                                                                                                                                                                                                                                                                                                                                                                                                                                                                                                                                                                                                                                                                                                                                                                                                                                                                                                                                                            |       |
| Risk of bias in individual studies | 14  | We will assess risk of bias as “low risk”, “unclear risk”, or “high risk”, in accordance with the Cochrane Collaboration’s Risk of bias tool as described in the Cochrane Hand book for Systematic Reviews of Interventions. The following items will be assessed: sequence generation, allocation concealment, blinding of participants and personnel, blinding of outcome assessors, incomplete outcome data, selective outcome reporting, and other sources of bias (e.g., sponsorship bias/researcher allegiance bias). Two independent review authors (XZ and YZ) will assess the risk of bias in selected studies. Degree of agreement between the two independent raters will be reported. Any disagreements will be resolved by a third review author (AC or PX). Where necessary, the authors of the studies will be contacted for further information. Studies will be classified as having high risk of bias if two or more domains were rated as high risk of bias; low if five or more were rated as low risk of bias and none was rated as high risk of bias, and all other cases will be assumed to pertain to moderate risk.                                                                                                                                                                                                                                                                                                                                                                                                                                                                                                                                                                                                                                                                                                                                                                                                                                                                                                                                                                                                                                                            | 13    |
| Data synthesis                     | 15a | We will perform Bayesian network meta-analysis to compare the relative outcomes of different antidepressant medications, psychotherapies or their combination from the median of the posterior distribution.                                                                                                                                                                                                                                                                                                                                                                                                                                                                                                                                                                                                                                                                                                                                                                                                                                                                                                                                                                                                                                                                                                                                                                                                                                                                                                                                                                                                                                                                                                                                                                                                                                                                                                                                                                                                                                                                                                                                                                                            | 13    |
|                                    | 15b | Network meta-analysis combines direct and indirect evidence for all relative treatment effects and provides estimates with maximum power. First, we will perform pairwise meta-analyses of direct evidence using the random-effects model with STATA version 14.0. Second, we will also perform a random-effects network meta-analysis (NMA) within a Bayesian framework using Markov chain Monte Carlo in WinBUGS version 1.4.3. Where different measures are used to assess the same outcome, continuous outcomes data will be pooled with standardised mean difference (SMD), and dichotomous outcomes will be analysed by calculating the odds ratio (OR). In the presence of minimally informative priors, Credible Intervals (CrIs) can be interpreted similarly to confidence intervals (CIs).<br>Missing dichotomous outcome data will be managed according to the intention to treat (ITT) principle, and all the dropouts after randomisation will be considered to be non-responders. Missing continuous outcome data will be analysed using the completer data. When p-values, t-values, confidence intervals or standard errors are reported in articles, SD will be calculated from their values. Where SDs are missing, attempts will be made to obtain these data through contacting trial authors. When this fails, they will be borrowed from the other trials in the network or from other published reports.<br>In the analysis of network meta-analysis, the pooled estimates will be obtained using the Markov Chains Monte Carlo method. Two Markov chains will be run simultaneously with different arbitrarily chosen initial values and non-informative priors will be used for the parameters. To ensure convergence, trace plots and the Brooks-Gelman-Rubin statistic will be assessed. We will also estimate the ranking probabilities for all treatments of being at each possible rank for each intervention. Then, we will obtain a treatment hierarchy using the surface under the cumulative ranking curve (SUCRA) and mean ranks. SUCRA can also be interpreted as the percentage of efficacy/safety of a treatment that would be ranked first without uncertainty. | 13-14 |
|                                    | 15c | Where possible, we will conduct the network meta-regression meta-analyses of data on primary outcomes for the: (i) age of participants (children vs. adolescents); (ii) sex ratio; (iii) the severity of depressive symptoms at baseline; and (iv) the treatment duration. If possible, we will do some extra subgroup analyses according to the results of heterogeneity and inconsistency. In the                                                                                                                                                                                                                                                                                                                                                                                                                                                                                                                                                                                                                                                                                                                                                                                                                                                                                                                                                                                                                                                                                                                                                                                                                                                                                                                                                                                                                                                                                                                                                                                                                                                                                                                                                                                                     | 15-16 |

1  
2  
3  
4  
5  
6  
7  
8  
9  
10  
11  
12  
13  
14  
15  
16  
17  
18  
19  
20  
21  
22  
23  
24  
25  
26  
27  
28  
29  
30  
31  
32  
33  
34  
35  
36  
37  
38  
39  
40  
41  
42  
43  
44  
45  
46  
47  
48  
49

|                                   |     |                                                                                                                                                                                                                                                                                                                                                                                                                                     |    |
|-----------------------------------|-----|-------------------------------------------------------------------------------------------------------------------------------------------------------------------------------------------------------------------------------------------------------------------------------------------------------------------------------------------------------------------------------------------------------------------------------------|----|
|                                   |     | sensitivity analysis, trials where missing data have been imputed will be excluded, and trials where high risk of bias rating have been assessed will be excluded. And, we will not only test whether the results change but also if transitivity (consistency/model fit) is affected. We will also examine some variables (e.g., sample size of trials <sup>53</sup> ), as continuous measure in meta-regression analyses.         |    |
|                                   | 15d | A systematic narrative synthesis will be provided with information presented in the text and tables to summarize and explain the characteristics and findings of the included studies.                                                                                                                                                                                                                                              | 15 |
| Meta-bias(es)                     | 16  | We will use the contour-enhanced funnel plot and Egger's test to assess risk of publication bias within each pairwise comparison. We will also use the comparison-adjusted funnel plots of all trials with placebo controls or inactive controls to investigate whether results in imprecise trials differ from those in more precise trials in network meta-analysis.                                                              | 15 |
| Confidence in cumulative evidence | 17  | We will also assess the quality of evidence contributing to primary outcomes with the GRADE framework, which characterises the quality of a body of evidence on the basis of the study limitations, imprecision, heterogeneity or inconsistency, indirectness, and publication bias. The starting point for confidence in each network estimate is high, but will be downgraded according to the assessments of these five aspects. | 16 |

**\* It is strongly recommended that this checklist be read in conjunction with the PRISMA-P Explanation and Elaboration (cite when available) for important clarification on the items. Amendments to a review protocol should be tracked and dated. The copyright for PRISMA-P (including checklist) is held by the PRISMA-P Group and is distributed under a Creative Commons Attribution Licence 4.0.**

*From: Shamseer L, Moher D, Clarke M, Ghersi D, Liberati A, Petticrew M, Shekelle P, Stewart L, PRISMA-P Group. Preferred reporting items for systematic review and meta-analysis protocols (PRISMA-P) 2015: elaboration and explanation. BMJ. 2015 Jan 2;349(jan02 1):g7647.*



# BMJ Open

## Comparative efficacy and acceptability of antidepressants, psychological interventions, and their combination for depressive disorder in children and adolescents: protocol for a network meta-analysis



|                                 |                                                                                                                                                                                                                                                                                                                                                                                                                                                                                                                                                                                                                                                                                                                                                                                                                                                                                                                                                                                                                                                                                                                                                                                                                                                                                                                                                                                                                                                                                                                                                                                                                                                                                                                                                                                                                           |
|---------------------------------|---------------------------------------------------------------------------------------------------------------------------------------------------------------------------------------------------------------------------------------------------------------------------------------------------------------------------------------------------------------------------------------------------------------------------------------------------------------------------------------------------------------------------------------------------------------------------------------------------------------------------------------------------------------------------------------------------------------------------------------------------------------------------------------------------------------------------------------------------------------------------------------------------------------------------------------------------------------------------------------------------------------------------------------------------------------------------------------------------------------------------------------------------------------------------------------------------------------------------------------------------------------------------------------------------------------------------------------------------------------------------------------------------------------------------------------------------------------------------------------------------------------------------------------------------------------------------------------------------------------------------------------------------------------------------------------------------------------------------------------------------------------------------------------------------------------------------|
| Journal:                        | <i>BMJ Open</i>                                                                                                                                                                                                                                                                                                                                                                                                                                                                                                                                                                                                                                                                                                                                                                                                                                                                                                                                                                                                                                                                                                                                                                                                                                                                                                                                                                                                                                                                                                                                                                                                                                                                                                                                                                                                           |
| Manuscript ID                   | bmjopen-2017-016608.R1                                                                                                                                                                                                                                                                                                                                                                                                                                                                                                                                                                                                                                                                                                                                                                                                                                                                                                                                                                                                                                                                                                                                                                                                                                                                                                                                                                                                                                                                                                                                                                                                                                                                                                                                                                                                    |
| Article Type:                   | Protocol                                                                                                                                                                                                                                                                                                                                                                                                                                                                                                                                                                                                                                                                                                                                                                                                                                                                                                                                                                                                                                                                                                                                                                                                                                                                                                                                                                                                                                                                                                                                                                                                                                                                                                                                                                                                                  |
| Date Submitted by the Author:   | 11-May-2017                                                                                                                                                                                                                                                                                                                                                                                                                                                                                                                                                                                                                                                                                                                                                                                                                                                                                                                                                                                                                                                                                                                                                                                                                                                                                                                                                                                                                                                                                                                                                                                                                                                                                                                                                                                                               |
| Complete List of Authors:       | Zhou, Xinyu; The First Affiliated Hospital of Chongqing Medical University, Department of Psychiatry<br>Cipriani, Andrea; University of Oxford, Department of Psychiatry; Warneford Hospital, Oxford Health NHS Foundation Trust<br>Zhang, Yuqing; The First Affiliated Hospital of Chongqing Medical University, Department of Neurology<br>Cuijpers, Pim; Vrije Universiteit Amsterdam, Department of Clinical, Neuro and Developmental Psychology, Amsterdam Public Health research institute<br>Hetrick, Sarah; University of Melbourne, Orygen, The National Centre of Excellence in Youth Mental Health, and the Centre of Youth Mental Health<br>Weisz, John; Harvard University, Department of Psychology<br>Pu, Juncai; The First Affiliated Hospital of Chongqing Medical University, Department of Neurology<br>Del Giovane, Cinzia; University of Modena and Reggio Emilia, Clinical and Diagnostic Medicine and Public Health<br>Furukawa, Toshi; Kyoto University, Department of Health Promotion and Human Behavior, Kyoto University Graduate School of Medicine and School of Public Health<br>Barth, Jürgen; University Hospital and University of Zurich, Institute of Complementary and Integrative Medicine<br>Coghill, David; University of Melbourne, Departments of Paediatrics and Psychiatry<br>Leucht, Stefan; Technische Universität München, Department of Psychiatry and Psychotherapy<br>Yang, Lining; The First Affiliated Hospital of Chongqing Medical University, Department of Neurology<br>Ravindran, Arun ; University of Toronto, Department of Psychiatry<br>Xie, Peng; The First Affiliated Hospital of Chongqing Medical University, Department of Neurology; Chongqing Medical University, Institute of Neuroscience and the Collaborative Innovation Center for Brain Science |
| <b>Primary Subject Heading</b>: | Mental health                                                                                                                                                                                                                                                                                                                                                                                                                                                                                                                                                                                                                                                                                                                                                                                                                                                                                                                                                                                                                                                                                                                                                                                                                                                                                                                                                                                                                                                                                                                                                                                                                                                                                                                                                                                                             |
| Secondary Subject Heading:      | Mental health, Pharmacology and therapeutics, Evidence based practice                                                                                                                                                                                                                                                                                                                                                                                                                                                                                                                                                                                                                                                                                                                                                                                                                                                                                                                                                                                                                                                                                                                                                                                                                                                                                                                                                                                                                                                                                                                                                                                                                                                                                                                                                     |
| Keywords:                       | Depression & mood disorders < PSYCHIATRY, Child & adolescent psychiatry < PSYCHIATRY, antidepressant, psychotherapy, network meta-analysis, systematic review                                                                                                                                                                                                                                                                                                                                                                                                                                                                                                                                                                                                                                                                                                                                                                                                                                                                                                                                                                                                                                                                                                                                                                                                                                                                                                                                                                                                                                                                                                                                                                                                                                                             |

1  
2  
3  
4  
5  
6  
7  
8  
9  
10  
11  
12  
13  
14  
15  
16  
17  
18  
19  
20  
21  
22  
23  
24  
25  
26  
27  
28  
29  
30  
31  
32  
33  
34  
35  
36  
37  
38  
39  
40  
41  
42  
43  
44  
45  
46  
47  
48  
49  
50  
51  
52  
53  
54  
55  
56  
57  
58  
59  
60

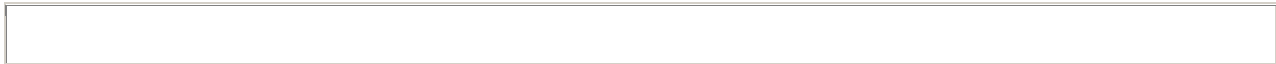

SCHOLARONE™  
Manuscripts

For peer review only



1  
2  
3  
4 **Comparative efficacy and acceptability of antidepressants, psychological interventions, and their**  
5 **combination for depressive disorder in children and adolescents: protocol for a network meta-**  
6 **analysis**  
7  
8  
9

10  
11  
12 Xinyu Zhou,<sup>1</sup> Andrea Cipriani,<sup>2,3</sup> Yuqing Zhang,<sup>4</sup> Pim Cuijpers,<sup>5</sup> Sarah E. Hetrick,<sup>6</sup> John R. Weisz,<sup>7</sup> Juncai Pu,<sup>4</sup>  
13  
14 Cinzia Del Giovane,<sup>8</sup> Toshiaki A. Furukawa,<sup>9</sup> Jürgen Barth,<sup>10</sup> David Coghill,<sup>11</sup> Stefan Leucht,<sup>12</sup> Lining Yang,<sup>4</sup>  
15  
16 Arun V Ravindran,<sup>13</sup> Peng Xie<sup>4</sup>  
17  
18  
19  
20  
21

22  
23 <sup>1</sup> Department of Psychiatry, The First Affiliated Hospital of Chongqing Medical University, Chongqing,  
24  
25 China

26  
27 <sup>2</sup> Department of Psychiatry, University of Oxford, Warneford Hospital, Oxford, UK

28  
29 <sup>3</sup> Oxford Health NHS Foundation Trust, Warneford Hospital, Oxford, UK

30  
31 <sup>4</sup> Department of Neurology, The First Affiliated Hospital of Chongqing Medical University, Chongqing,  
32  
33 China;

34  
35 Institute of Neuroscience and the Collaborative Innovation Center for Brain Science, Chongqing Medical  
36  
37 University, Chongqing, China

38  
39 <sup>5</sup> Department of Clinical, Neuro and Developmental Psychology, Amsterdam Public Health research institute,  
40  
41 Vrije Universiteit Amsterdam, The Netherlands

42  
43 <sup>6</sup> Orygen, The National Centre of Excellence in Youth Mental Health, and the Centre of Youth Mental Health,  
44  
45 University of Melbourne, Melbourne, Australia

46  
47 <sup>7</sup> Department of Psychology, Harvard University, Cambridge, MA, USA

48  
49 <sup>8</sup> Department of Diagnostic, Clinical and Public Health Medicine, University of Modena and Reggio Emilia,  
50  
51 Modena, Italy

52  
53 <sup>9</sup> Department of Health Promotion and Human Behavior, Kyoto University Graduate School of Medicine and  
54  
55 School of Public Health, Kyoto, Japan

56  
57 <sup>10</sup> Institute for Complementary and Integrative Medicine, University Hospital and University of Zurich,  
58  
59  
60

1  
2  
3 Zurich, Switzerland

4  
5 <sup>11</sup> Departments of Paediatrics and Psychiatry, University of Melbourne, Melbourne, Australia

6  
7 <sup>12</sup> Department of Psychiatry and Psychotherapy, Technische Universität München, Munich, Germany

8  
9 <sup>13</sup> Department of Psychiatry, University of Toronto, Toronto, ON, Canada

10  
11  
12  
13 **Direct correspondence to:**

14 Prof. Peng Xie, Department of Neurology, The First Affiliated Hospital of Chongqing Medical University, 1

15 Youyi Road, Yuzhong District, Chongqing 400016, China; E-mail: [xiepeng973@126.com](mailto:xiepeng973@126.com)

16  
17  
18 Xinyu Zhou and Andrea Cipriani contributed equally to this work.

19  
20  
21  
22  
23 Keywords: depression, child, adolescent, antidepressant, psychotherapy, network meta-analysis, systematic  
24 review

25  
26 Word count: 3509.

## ABSTRACT

**Introduction:** Depressive disorder is common in children and adolescents, with important consequences and serious impairments in terms of personal and social functioning. While both pharmacological and psychological interventions have been shown to be effective, there is still uncertainty about the balance between these and what treatment strategy should be preferred in clinical practice. Therefore, we aim to compare and rank in a network meta-analysis (NMA) the commonly used psychological, pharmacological and combined interventions for depressive disorder in children and adolescents.

**Methods and analysis:** We will update the literature search of two previous NMAs for the identification of trials of antidepressant and psychotherapy alone for depressive disorder in children and adolescents. For identification of trials of combination interventions, seven databases (PubMed, EMBASE, CENTRAL (Cochrane Central Register of Controlled Trials), Web of Science, PsycINFO, CINAHL, LiLACS) will be searched from date of inception. We will also search ClinicalTrials.gov, the World Health Organization International Clinical Trials Registry Platform, and check relevant reports on the US FDA website for unpublished data. Building on our previous findings in the field, we will include any commonly prescribed oral antidepressants, and any manualised or structured psychotherapies, as well as their combinations. Randomised controlled trials assessing any active intervention against active comparator or pill placebo/psychological controls in acute treatment for depressive disorder in children and adolescents will be included. The primary outcomes will be efficacy (mean change in depressive symptoms), and acceptability of treatment (dropout rate due to any cause). The secondary outcomes will be remission rate, tolerability of treatment (dropouts for adverse events), as well as suicide-related outcomes (suicidal behavior or ideation). We will perform Bayesian NMAs for all relative outcome measures. Subgroup analyses and sensitivity analyses will be conducted to assess the robustness of the findings.

**Dissemination:** This NMA will provide the most up to date and clinically useful information about the comparative efficacy and acceptability of antidepressants, psychological intervention and their combination in the acute treatment of children and adolescents with depressive disorder. This is the newest network meta-

1  
2  
3  
4  
5  
6  
7  
8  
9  
10  
11  
12  
13  
14  
15  
16  
17  
18  
19  
20  
21  
22  
23  
24  
25  
26  
27  
28  
29  
30  
31  
32  
33  
34  
35  
36  
37  
38  
39  
40  
41  
42  
43  
44  
45  
46  
47  
48  
49  
50  
51  
52  
53  
54  
55  
56  
57  
58  
59  
60

analysis and therefore these results are very important in terms of evidence-based medicine. The results will be disseminated through peer-reviewed publication.

**Protocol registration:** PROSPERO CRD42015020841

For peer review only

### Strengths and limitations of this study

1  
2  
3  
4  
5  
6  
7  
8  
9  
10  
11  
12  
13  
14  
15  
16  
17  
18  
19  
20  
21  
22  
23  
24  
25  
26  
27  
28  
29  
30  
31  
32  
33  
34  
35  
36  
37  
38  
39  
40  
41  
42  
43  
44  
45  
46  
47  
48  
49  
50  
51  
52  
53  
54  
55  
56  
57  
58  
59  
60

1. The network meta-analysis can integrate direct evidence with indirect evidence from multiple treatment comparisons and multiple control approaches to estimate the interrelations across all treatments, which can guide treatment decisions and guideline development.

2. For the first time the efficacy, acceptability, tolerability, and suicide-related outcomes of pharmacological and psychological interventions, alone or in combination for depressive disorder in children and adolescents will be comprehensively assessed in a network meta-analysis.

3. We will employ validated local and global methods to evaluate consistency and we will explore whether treatment effects are robust in network subgroup analyses and sensitivity analyses. The quality of evidence for network estimates of the primary outcomes will be assessed with the GRADE framework, which characterises the quality of a body of evidence on the basis of the study limitations, imprecision, heterogeneity or inconsistency, indirectness, and publication bias.

## Background

Depressive disorder in children and adolescents is a major public health problem, affecting 1% to 2% of children (6–12 years old) and 2% to 5% of adolescents (13–18 years old), with a peak incidence around puberty.<sup>1,2</sup> The course of depressive disorder in children and adolescents is often characterised by protracted episodes, frequent recurrence, and comorbid psychiatric disorders.<sup>3</sup> Compared with adults, the identification and diagnosis of depressive disorder in children and adolescents may be more often missed by clinicians<sup>4</sup> due to undifferentiated signs and symptoms and atypical presentations. Thus, many such patients exhibit serious impairments in social functioning (e.g., poor school achievement; relational problems with family members and peers),<sup>5</sup> and are significantly increased risk for suicide behaviors and ideation.<sup>6</sup> For example, a report from the American Academy of Child and Adolescent Psychiatry (AACAP) suggested that depressive disorder is contributed to over 500,000 suicide attempts by children and adolescents a year.<sup>7</sup>

The past two decades have seen significant increases in the data for children and adolescents with depression and both pharmacological and psychological therapies have been effective. Among current psychological interventions, based on our previous findings, cognitive behavior therapy (CBT) and interpersonal psychotherapy (IPT) seem to be the best available psychotherapies for depression in children and adolescents.<sup>8,9</sup> Multiple pharmacological therapies have also been studied for the treatment of depressive disorder in children and adolescents.<sup>10–12</sup> The controversy about the use of antidepressants in this age group, due the potentially increased risk of suicidality, has not been fully resolved.<sup>13</sup> Recently, the findings of our previous studies showed most antidepressants do not seem to offer a clear benefit for children and adolescents, and fluoxetine is probably the best option to consider when a pharmacological treatment is indicated.<sup>10</sup>

Several clinical practice guidelines recommend that in children and adolescents, psychotherapy should be considered as the first-line intervention for the management of depressive disorder, while pharmacological treatments are often reserved for more severe illness or when psychotherapy does not work or is not available.<sup>14,15</sup> Nevertheless, the evidence-base for psychotherapy to be more effective and safer than antidepressants in the treatment of child and adolescent depressive disorder is not well established. A large,

1  
2  
3 non-industry funded trial reported superior efficacy for fluoxetine compared to CBT in adolescents with  
4 major depression.<sup>16</sup> Previous research supports the notion that psychotherapy has its own side-effects, such as  
5 dependency on the therapist, and leading to distress for the patients' family.<sup>17</sup> However, unlike with  
6 antidepressants, they are rarely measured systematically, making the comparison of safety and tolerability  
7 harder.<sup>18</sup> Moreover, data from the adult studies showed that combination antidepressants and psychotherapy  
8 is superior to either intervention alone.<sup>19,20</sup> Recently, a Cochrane conventional meta-analysis, on the basis of  
9 the very limited evidence, reported that the effectiveness of psychological interventions, antidepressant  
10 medication and a combination of these interventions for treating depressive disorders in children and  
11 adolescents cannot be established.<sup>21</sup>

22  
23 Network meta-analysis has the advantage that all interventions that have been tested in randomised  
24 controlled trials (RCTs) can be simultaneously compared, without requiring direct within-study treatment vs.  
25 treatment comparisons. Thus effects of the different treatments can be estimated relative to each other as well  
26 as to a common reference condition (e.g., pill placebo or psychological controls).<sup>22</sup> Network meta-analysis thus  
27 overcomes some of the limitations of traditional meta-analysis, in which conclusions are largely restricted to  
28 comparisons between treatments that have been directly compared in RCTs.<sup>23</sup> In our two previous network  
29 meta-analyses the comparative efficacy and acceptability of psychotherapies and antidepressants for  
30 depressive disorder in children and adolescents have been separately investigated<sup>8,10</sup> The aim of the current  
31 protocol is to synthesise all this evidence and provide clinicians with a reliable treatment algorithm of the  
32 commonly used psychological, and pharmacological interventions, as well as their combinations for the acute  
33 treatment of depressive disorder in children and adolescents.

## 48 **Methods**

### 49 *Criteria for included studies*

#### 50 **Types of studies**

51  
52 Any randomised controlled trials (RCTs), including the first phase of cross-over trials as well as cluster-  
53 randomised trials, will be included. Quasi-randomised trials (e.g., those allocating participants using alternate  
54  
55  
56  
57  
58  
59  
60

1  
2  
3 days of the week) will be excluded. For trials of antidepressants alone, only double-blind RCTs (patients and  
4  
5 raters blinded) will be included. As it is difficult to utilise a double-blind design for patients in trials of  
6  
7 psychotherapy alone or the combination of antidepressant and psychotherapy, we will only include trials in  
8  
9 which raters were blinded or participants were assessed by self-rating depression scales.  
10  
11

### 12 13 14 **Types of participants**

15  
16 We will include studies that enrolled participants aged less than 18 years of age when they are initially  
17  
18 enrolled in the studies, of both sexes with a diagnosis of depressive disorder, including of major depressive  
19  
20 disorder (MDD), dysthymia, and other specified types, based on standardised diagnostic criteria (e.g., the  
21  
22 Diagnostic and Statistical Manual of Mental Disorders or the International Classification of Diseases).<sup>24-29</sup>  
23  
24 While it is accepted that subclinical depression still has a significant impact on an individuals' social and  
25  
26 educational functioning, we will not include studies of this population. Similarly, studies where depressive  
27  
28 disorder was not formally diagnosed will also be excluded for the same rationale that its clinical  
29  
30 heterogeneity could violate the transitivity assumption in NMA (i.e. one can compare indirectly intervention  
31  
32 B and C via intervention A).<sup>30</sup> We will also exclude trials in which participants are described as having  
33  
34 psychotic depression or treatment-resistant depression, as their treatment response differs from patients  
35  
36 without treatment resistance or symptoms of psychosis. Trials focusing on child or adolescent bipolar  
37  
38 disorder will also be excluded, but not those involving patients with other comorbid psychiatric disorders as  
39  
40 diagnosed according to standardised criteria (e.g., anxiety disorder, or attention deficit hyperactivity  
41  
42 disorder). Where a study includes both adults and children/adolescents and the randomisation had been  
43  
44 stratified according this variable, the data will be included if data on the depressed youths can be separately  
45  
46 extracted from the manuscript, or can be obtained from the authors. Studies conducted in both inpatient and  
47  
48 outpatient settings will be included. RCTs recruiting participants with an overall sample size of fewer than  
49  
50 ten patients will be excluded.  
51  
52  
53  
54

### 55 56 57 58 **Types of interventions**



1  
2  
3  
4 For pharmacological interventions, we will include any commonly prescribed oral antidepressants (fixed  
5 or flexible doses). These will include tricyclic antidepressants (TCAs; amitriptyline, clomipramine,  
6 nortriptyline, desipramine, imipramine, etc.), selective serotonin reuptake inhibitors (SSRIs; escitalopram,  
7 fluoxetine, paroxetine, sertraline, etc.), and serotonin-norepinephrine reuptake inhibitors (SNRIs; venlafaxine,  
8 duloxetine), as well as novel agents mirtazapine and nefazodone. In terms of psychological interventions, we  
9 will include any manualised or structured psychotherapies, e.g., behavioral therapy, cognitive-behavioral  
10 therapy, cognitive therapy, family therapy, interpersonal therapy, play therapy, problem-solving therapy,  
11 psychodynamic therapy, and supportive therapy. Table 1 provides the detailed description of  
12 psychotherapies. Also, we will include the combination of both above-mentioned psychological interventions  
13 and pharmacological interventions. For the pharmacological interventions, the control condition is always a  
14 pill placebo, whilst the psychological control conditions are waiting-list (WL), treatment as usual (TAU),  
15 psychological placebo or attention placebo, or no-treatment (NT).  
16  
17  
18  
19  
20  
21  
22  
23  
24  
25  
26  
27  
28  
29  
30  
31

32 All RCTs comparing any active intervention (psychological interventions, pharmacological interventions,  
33 or their combinations) with either active comparators or control conditions for acute treatment of depressive  
34 disorder in children and adolescents will be included. The acute phase will be defined as from 4 to 16 week.  
35 We will exclude trials with treatment duration of less than 4 weeks, because the onset of benefit for most  
36 antidepressants often takes at least 4 weeks.<sup>31</sup> If a study present data for more than one time point within our  
37 pre-defined acute phase window or beyond 16 weeks, the 8-week (or the closest to 8-week) will be taken as  
38 the time. Trials comparing the same antidepressant at different therapeutic doses will be merged in the same  
39 node in the network analysis so long as they are within the dose range licensed by drug regulatory agencies.  
40 Also, trials comparing the same type of psychological interventions but at different numbers of therapeutic  
41 sessions, different delivery format (group, individual), different treatment medium (face-to-face, internet-  
42 based), and different treatment conditions (with or without family involvement) will be considered as the  
43 same node in the network analysis. We anticipate that any patient who meets all inclusion criteria, in  
44 principal, is equally likely to be randomised to any of the interventions in the synthesis comparator set.  
45  
46  
47  
48  
49  
50  
51  
52  
53  
54  
55  
56  
57  
58  
59  
60

1  
2  
3 We have generated an ideal network plot that is a fully connected network with all expected  
4 interventions (Figure 1).  
5  
6  
7  
8  
9

## 10 **Types of outcome measures**

### 11 *Primary outcomes*

- 12  
13  
14 (1) Efficacy (as a continuous outcome), measured by the overall mean change scores on depressive symptom  
15 scales (self- or assessor-rated), e.g., Children's Depression Rating Scale (CDRS-R)<sup>32</sup> and Hamilton  
16 Depression Rating Scale (HAMD)<sup>33</sup> from baseline to endpoint.  
17  
18  
19  
20  
21 (2) Acceptability of treatment, defined as the proportion of patients who drop out of the study by any cause  
22 during the delivery of the intervention.  
23  
24  
25  
26

### 27 *Secondary outcomes*

- 28  
29  
30 (1) Efficacy (as dichotomous outcome), measured by the total number of patients who achieved the criteria of  
31 remission, defined as being below the threshold in depression rating score (e.g., less than 28 for CDRS-  
32 R),<sup>34</sup> while these thresholds are different across trials.  
33  
34  
35  
36 (2) Tolerability of treatment, defined as the proportion of patients who discontinued treatment due to any  
37 adverse events during the delivery of the intervention.  
38  
39  
40  
41 (3) Suicide-related outcome, estimated by the reported cases of definitive suicidal behavior or suicidal  
42 ideation during the acute phase of treatment. The definition of suicide-related outcome is based on the  
43 Columbia Classification Algorithm of Suicide Assessment (C-CASA).<sup>35</sup> For the antidepressants trials,  
44 the data on suicidality mainly referred to the Columbia re-analysis data reported in the FDA report.<sup>36</sup> If  
45 trials are not included in this report, we will attempt to extract the data on suicide-related outcome  
46 from the Medicines and Healthcare products Regulatory Agency database or the pharmaceutical  
47 company website. For the psychological trials and the combination trials, we will mainly extract the  
48 data on suicidality from original text, and from related reviews.  
49  
50  
51  
52  
53  
54  
55  
56  
57  
58  
59  
60

1  
2  
3  
4 (4) Global functional improvement, estimated by overall change scores on global assessment of functioning  
5 scales, e.g., Children's Global Assessment Scale (CGAS)<sup>37</sup> and Global Assessment of Functioning Scale  
6 (GAF),<sup>38</sup> or quality of life scales, e.g., Quality of Life Enjoyment and Satisfaction Questionnaire (Q-LES-  
7 Q).<sup>39</sup> When data are reported on more than one measure, we will first chose data from the CGAS, then  
8 the GAF, and finally the Q-LES-Q and others.  
9  
10  
11  
12  
13

14  
15  
16 Where depression symptoms are measured using more than one depression scale in a trial, we will  
17 extract data from the depressive scales on the basis of a hierarchy of rating scales. The hierarchy will be based  
18 on psychometric properties and appropriateness for use with children and adolescents and for consistency of  
19 use across trials (referred from the Zhou et al study<sup>40</sup>, Table 2). We will also establish a hierarchy of  
20 informants of depressive rating scales, with the clinician report first in the hierarchy, and then the child or  
21 adolescent self-report.  
22  
23  
24  
25  
26  
27  
28  
29  
30  
31

### 32 **Data Sources and Search strategy**

33  
34 For the identification of trials of antidepressant and psychotherapy alone for depressive disorder in  
35 children and adolescents, we will update the literature search of our two previous network meta-analyses.<sup>8,10</sup>  
36 Other eligible trials of the combinations of antidepressant and psychotherapy will be identified by searching  
37 PubMed, EMBASE, CENTRAL (Cochrane Central Register of Controlled Trials), Web of Science, PsycINFO,  
38 ProQuest, CINAHL, LiLACS from date of inception with Medical Subject Headings (MeSH) and text words:  
39 (depress\* or dysthymi\* or mood disorder\* or affective disorder\*) and (adolesc\* or child\* or boy\* or girl\* or  
40 juvenil\* or minors or paediatric\* or pediatric\* or pubescen\* or school\* or student\* or teen\* or young or youth\*)  
41 and ("selective serotonin reuptake inhibitor\*" or SSRIs or "serotonin norepinephrine reuptake inhibitor\*" or  
42 SNRIs or citalopram or fluoxetine or paroxetine or sertraline or escitalopram or fluvoxamine or venlafaxine or  
43 duloxetine "noradrenergic and specific serotonergic antidepressants" or NaSSA or mirtazapine or TCA or  
44 tricyclic or amitriptyline or clomipramine or desipramine or imipramine or nortriptyline) and  
45 (psychotherapy\* or behavio\* or "family therap\*" or CBT or cognitive or interpersonal or IPT or "play therap\*")  
46  
47  
48  
49  
50  
51  
52  
53  
54  
55  
56  
57  
58  
59  
60

1  
2  
3 or supportive or problem-solving or psychodynamic). We will also search ClinicalTrials.gov in USA and other  
4 international trial registers via the International Clinical Trials Registry Platform (ICTRP) in WHO. We will  
5 also check relevant reports on the US Food and Drug Administration (FDA) website, and hand-search key  
6 journals, conference proceedings, such as, *J Child Adolesc Psychopharmacol*, *J Am Acad Child Adolesc Psychiatry*,  
7 *Child Adolesc Psychiatry Ment Health*, *Psychopharmacol Bull*, *Arch Gen Psychiatry*, *Am J Psychiatry*, *Eur Psychiatry*,  
8 *Depress Anxiety*. There will be no restrictions on language, or publication year. Additional relevant studies  
9 will be obtained by scanning reference lists of trials identified in the initial searches and relevant review  
10 papers. We will also inquire at the relative pharmaceutical companies (e.g., GlaxoSmithKline, Lilly, Organon,  
11 Forest Pharmaceuticals, Bristol-Myers Squibb) and search their websites for unpublished data. All relevant  
12 experts and principal manufacturers will be contacted to supplement incomplete reports of the original  
13 papers or to provide new data for unpublished studies.  
14  
15  
16  
17  
18  
19  
20  
21  
22  
23  
24  
25  
26  
27  
28  
29

## 30 **Study selection and data extraction**

### 31 *Selection of trials*

32  
33  
34 Titles and abstracts identified from the search strategies will be independently examined by two  
35 reviewers (XZ and YZ). If both reviewers judge that the trial does not meet eligibility criteria, we will exclude  
36 it. Then, we will obtain the full-texts of all remaining articles and determine whether to include them  
37 according to inclusion criteria described above. We will calculate the inter-rater reliability of the two raters.  
38 Any disagreements will be resolved by a third review author (AC or PX) or by consultation with the authors  
39 of the articles. The reasons for exclusion of trials will be reported in the characteristics of excluded studies list.  
40  
41  
42  
43  
44  
45  
46  
47  
48

### 49 *Data extraction*

50  
51 Two independent reviewers (XZ and YZ) will extract the data from each included trial using  
52 standardised data extraction forms, including study characteristics (e.g., first listed author, publication year,  
53 title, publication type, publication journal, country, and sponsor), patient characteristics (e.g., diagnostic  
54 criteria, comorbidities, the age of patients, patient setting, the number of patients, the gender of patients, and  
55  
56  
57  
58  
59  
60

1  
2  
3 severity of depression at baseline), intervention details (e.g., the type of intervention, the treatment duration,  
4 the dose of antidepressant agent, the length and number of sessions of psychotherapy, treatment delivery and  
5 treatment medium of psychotherapy) and outcome measures (primary outcomes and secondary outcomes).  
6  
7 We will assess and report the reliability of the reviewers' data extraction on each coded variable. Any  
8 disagreements will be resolved by a third review author (AC or PX). Where necessary, the authors of the  
9 studies will be contacted for further information.  
10  
11  
12  
13  
14  
15  
16  
17  
18

### 19 *Risk of bias assessment*

20  
21 We will assess risk of bias as "low risk", "unclear risk", or "high risk", in accordance with the Cochrane  
22 Collaboration's Risk of bias tool as described in the Cochrane Hand book for Systematic Reviews of  
23 Interventions.<sup>41</sup> The following items will be assessed: sequence generation, allocation concealment, blinding of  
24 participants and personnel, blinding of outcome assessors, incomplete outcome data, selective outcome  
25 reporting, and other sources of bias (e.g., sponsorship bias/researcher allegiance bias). Two independent  
26 review authors (XZ and YZ) will assess the risk of bias in selected studies. Degree of agreement between the  
27 two independent raters will be reported. Any disagreements will be resolved by a third review author (AC or  
28 PX). Where necessary, the authors of the studies will be contacted for further information. Studies will be  
29 classified as having high risk of bias if two or more domains were rated as high risk of bias; low if five or  
30 more were rated as low risk of bias and none was rated as high risk of bias, and all other cases will be  
31 assumed to pertain to moderate risk.  
32  
33  
34  
35  
36  
37  
38  
39  
40  
41  
42  
43  
44  
45  
46

### 47 **Statistical analysis**

48  
49 Network meta-analysis combines direct and indirect evidence for all relative treatment effects and  
50 provides estimates with maximum power.<sup>23</sup> First, we will perform pairwise meta-analyses of direct evidence  
51 using the random-effects model with STATA version 14.0. Second, we will also perform a random-effects  
52 network meta-analysis (NMA) within a Bayesian framework using Markov chain Monte Carlo in WinBUGS  
53 version 1.4.3. Where different measures are used to assess the same outcome, continuous outcomes data will  
54  
55  
56  
57  
58  
59  
60

1  
2  
3 be pooled with standardised mean difference (SMD), and dichotomous outcomes will be analysed by  
4  
5 calculating the odds ratio (OR). In the presence of minimally informative priors, Credible Intervals (CrIs) can  
6  
7 be interpreted similarly to confidence intervals (CIs).  
8  
9

10 Missing dichotomous outcome data will be managed according to the intention to treat (ITT) principle,  
11  
12 and all the dropouts after randomisation will be considered to be non-responders. Missing continuous  
13  
14 outcome data will be analysed using the completer data. When p-values, t-values, confidence intervals or  
15  
16 standard errors are reported in articles, SD will be calculated from their values.<sup>42</sup> Where SDs are missing,  
17  
18 attempts will be made to obtain these data through contacting trial authors. When this fails, they will be  
19  
20 borrowed from the other trials in the network or from other published reports.<sup>42</sup>  
21  
22

23 In the analysis of network meta-analysis, the pooled estimates will be obtained using the Markov Chains  
24  
25 Monte Carlo method. Two Markov chains will be run simultaneously with different arbitrarily chosen initial  
26  
27 values and non-informative priors will be used for the parameters. To ensure convergence, trace plots and the  
28  
29 Brooks-Gelman-Rubin statistic will be assessed.<sup>43</sup> We will also estimate the ranking probabilities for all  
30  
31 treatments of being at each possible rank for each intervention. Then, we will obtain a treatment hierarchy  
32  
33 using the surface under the cumulative ranking curve (SUCRA) and mean ranks. SUCRA can also be  
34  
35 interpreted as the percentage of efficacy/safety of a treatment that would be ranked first without  
36  
37 uncertainty.<sup>44</sup>  
38  
39

#### 40 41 42 *Measures for transitivity assumption*

43  
44 We will assess whether the included interventions are similar when they are evaluated in RCTs with  
45  
46 different designs; and whether the distributions of clinical and methodological variables that can act as effect  
47  
48 modifiers across treatment comparison are balanced across comparisons. The clinical features, which have  
49  
50 been demonstrated to date to moderate efficacy of antidepressants and psychotherapy in children and  
51  
52 adolescents include bipolarity,<sup>45</sup> psychotic features,<sup>46</sup> subthreshold depression.<sup>47</sup> We have assured transitivity  
53  
54 in our network with regard to these variables by limiting our samples to participants with non-psychotic  
55  
56 unipolar depressive disorders. Other clinical or methodological variables that may influence our primary  
57  
58  
59  
60

1  
2  
3 outcomes of treatment efficacy or acceptability include: age, sex, depressive severity at baseline, and the  
4  
5 treatment duration.  
6

### 7 *Measures for heterogeneity*

8  
9  
10 In standard pairwise meta-analyses we will estimate a different heterogeneity variance for each pairwise  
11  
12 comparisons; in network meta-analysis we will assume a common estimate for the heterogeneity variance  
13  
14 across the different comparisons. We will assess statistically the presence of heterogeneity within each  
15  
16 pairwise comparison using the I-squared statistic<sup>48</sup> and its 95% confidence interval that measures the  
17  
18 percentage of variability that cannot be attributed to random error. The assessment for the presence of  
19  
20 statistical heterogeneity in the entire network will be based on the magnitude of the heterogeneity variance  
21  
22 parameter ( $\tau^2$ ) estimated from the NMA models. We will also estimate a total I-squared value and predictive  
23  
24 intervals for heterogeneity in the network.<sup>49</sup>  
25  
26  
27  
28

### 29 *Measures for inconsistency*

30  
31  
32 NMA assumes that there is consistency in the network (i.e. direct and indirect evidence are in  
33  
34 agreement). However, the assumption of consistency can be violated either in the entire network or in certain  
35  
36 parts (i.e. loops of evidence) of the network.<sup>50</sup> Therefore, consistency needs to be checked. We will evaluate  
37  
38 the presence of local inconsistency and global inconsistency in STATA version 14.0 and will be duplicated in  
39  
40 R software.<sup>51</sup>  
41  
42  
43  
44

### 45 *Measures for publication bias*

46  
47 We will use the contour-enhanced funnel plot and Egger's test to assess risk of publication bias within  
48  
49 each pairwise comparison.<sup>52</sup> We will also use the comparison-adjusted funnel plots of all trials with placebo  
50  
51 controls or inactive controls to investigate whether results in imprecise trials differ from those in more precise  
52  
53 trials in network meta-analysis.<sup>53</sup>  
54  
55  
56  
57

### 58 *Subgroup analyses and sensitivity analyses*

1  
2  
3  
4       Where possible, we will conduct the network meta-regression meta-analyses of data on primary  
5  
6 outcomes for the: (i) age of participants (children vs. adolescents); (ii) sex ratio; (iii) the severity of depressive  
7  
8 symptoms at baseline; (iv) the treatment duration; (v) the dosing schedule (fixed or flexible doses). If possible,  
9  
10 we will do some extra subgroup analyses according to the results of heterogeneity and inconsistency. In the  
11  
12 sensitivity analysis, trials where missing data have been imputed will be excluded, trials where high risk of  
13  
14 bias rating have been assessed, and trials where only included patients comorbidity with other psychiatric  
15  
16 disorders will be excluded. And, we will not only test whether the results change but also if transitivity  
17  
18 (consistency/model fit) is affected. We will also examine some variables (e.g., sample size of trials<sup>54</sup>), as  
19  
20 continuous measure in meta-regression analyses.  
21

#### 22 23 24 25 *GRADE quality assessment*

26  
27       We will also assess the quality of evidence contributing to primary outcomes with the GRADE  
28  
29 framework, which characterises the quality of a body of evidence on the basis of the study limitations,  
30  
31 imprecision, heterogeneity or inconsistency, indirectness, and publication bias.<sup>55</sup> The starting point for  
32  
33 confidence in each network estimate is high, but will be downgraded according to the assessments of these  
34  
35 five aspects.  
36  
37

#### 38 39 40 41 *Ethics and dissemination*

42  
43       This network meta-analysis does not need ethical approval, as data used here are based on aggregated  
44  
45 data in the public domain. Findings from the analysis will provide an overview and information on the  
46  
47 relative efficacy and acceptability of antidepressant medications, psychological therapies, and their  
48  
49 combination for depressive disorder in children and adolescents. It is suggested that the findings will have  
50  
51 significant implications for clinical practice and further research.  
52  
53  
54  
55  
56  
57  
58  
59  
60



1  
2  
3  
4 **Contributors** PX, AC, and XZ conceived the study and drafted the protocol. PX, AC and XZ wrote the first  
5  
6  
7 draft of the manuscript. PC, SEH, JRW, CDG, TAF, JB, DC, SL, AVR assisted in protocol design and revision.  
8  
9  
10 XZ, YZ, and LY participated in the search strategy development. CDG, and JP participated in the design of  
11  
12 data synthesis and analysis. All the authors have approved the publication of the protocol.

13  
14  
15 **Funding** This work is supported by the National Basic Research Program of China (973 Program) (Grant No.  
16  
17  
18 2009CB918300). The funders had no role in the protocol design; the writing of the protocol; or the decision to  
19  
20  
21 submit the protocol for publication.

22  
23  
24 **Competing interests** AC reports personal fees from Accord Healthcare as an expert witness for a patent issue  
25  
26  
27 about quetiapine extended release. SEH is an Editor of the Cochrane Common Mental Disorders Group, an  
28  
29  
30 author of the Cochrane systematic review of newer generation antidepressants for depression in children and  
31  
32  
33 adolescents, and an author (senior) on the Cochrane review of psychological, pharmacological and their  
34  
35  
36 combination for child/adoles depression. DC reports grants and personal fees from Shire; personal fees from  
37  
38  
39 Eli Lilly, Janssen Cilag, Novartis, Sandoz, Oxford University Press; and grants from European Union FP7,  
40  
41  
42 outside of the submitted work. Eli Lilly has provided drugs for a clinical trial led by SL as the principal  
43  
44  
45 investigator. AVR reports personal fees from Bristol Myers Squibb, Pfizer, Sunovion; grants from Pfizer,  
46  
47  
48 Grand Challenges Canada, Canadian Institute of Health Research, and AstraZeneca, outside of the submitted  
49  
50  
51 work. TAF has received lecture fees from Eli Lilly, Janssen, Meiji, MSD, Otsuka, Pfizer and Tanabe-Mitsubishi,  
52  
53  
54 and consultancy fees from Sekisui Chemicals and Takeda Science Foundation. He has received royalties from  
55  
56  
57  
58  
59  
60

1  
2  
3  
4 Igaku-Shoin and Nihon Bunka Kagaku-sha publishers. He has received research support from Mochida and  
5  
6  
7 Tanabe-Mitsubishi. XZ, YZ, PC, JRW, JP, CDG, TAF, JB, and LY declare no competing interests.  
8

9  
10 **Acknowledgments** Andrea Cipriani is supported by the National Institute for Health Research Oxford  
11  
12 Cognitive Health Clinical Research Facility. We thank Philip Hazell from Discipline of Psychiatry, Sydney  
13  
14 Medical School, Concord West, NSW, Australia, David Cohen from Department of Child and Adolescent  
15  
16 Psychiatry, Hôpital Pitié-Salpêtrière, Institut des Systèmes Intelligents et Robotiques, Université Pierre et  
17  
18 Marie Curie, Paris, France, and Craig Whittington from Doctor Evidence, Santa Monica, CA, USA, for their  
19  
20  
21  
22  
23  
24 valuable advice.  
25

26  
27 **Provenance and peer review** Not commissioned; externally peer-reviewed.  
28

29  
30 **Open Access** This is an Open Access article distributed in accordance with the Creative Commons  
31  
32 Attribution- Non Commercial (CC BY-NC 4.0) license, which permits others to distribute, remix, adapt, build  
33  
34 upon this work non-commercially, and license their derivative works on different terms, provided the  
35  
36 original work is properly cited and the use is non-commercial. See: See:  
37  
38  
39  
40  
41 <http://creativecommons.org/licenses/by-nc/4.0/>  
42  
43  
44  
45  
46  
47  
48  
49  
50  
51  
52  
53  
54  
55  
56  
57  
58  
59  
60

## References

1. Costello EJ, Mustillo S, Erkanli A, *et al.* Prevalence and development of psychiatric disorders in childhood and adolescence. *Arch Gen Psychiatry* 2003;60:837-44.
2. Kessler RC, Berglund P, Demler O, *et al.* Lifetime prevalence and age-of-onset distributions of DSM-IV disorders in the National Comorbidity Survey Replication. *Arch Gen Psychiatry* 2005;62:593-602.
3. Thapar A, Collishaw S, Pine DS, *et al.* Depression in adolescence. *Lancet* 2012;379:1056-67.
4. Hazell P. Depression in children. *BMJ* 2002;325:229-30.
5. Puig-Antich J, Lukens E, Davies M, *et al.* Psychosocial functioning in prepubertal major depressive disorders. II. Interpersonal relationships after sustained recovery from affective episode. *Arch Gen Psychiatry* 1985;42:511-7.
6. Gould MS, King R, Greenwald S, *et al.* Psychopathology associated with suicidal ideation and attempts among children and adolescents. *J Am Acad Child Adolesc Psychiatry* 1998;37:915-23.
7. Centers for Disease Control and Prevention (CDC). Suicide trends among youths and young adults aged 10-24 years-United States, 1990-2004. *Morb Mortal Wkly Rep* 2007;56:905-8.
8. Zhou X, Hetrick SE, Cuijpers P, *et al.* Comparative efficacy and acceptability of psychotherapies for depression in children and adolescents: a systematic review and network meta-analysis. *World Psychiatry* 2015;14:207-22.9. Weisz JR, McCarty CA, Valeri SM. Effects of psychotherapy for depression in children and adolescents: a meta-analysis. *Psychol Bull* 2006;132:132-49.
10. Cipriani A, Zhou X, Del Giovane C, *et al.* Comparative efficacy and tolerability of antidepressants for major depressive disorder in children and adolescents: a network meta-analysis. *Lancet* 2016;388:881-90.
11. Hetrick SE, McKenzie JE, Cox GR, *et al.* Newer generation antidepressants for depressive disorders in children and adolescents. *Cochrane Database Syst Rev* 2012;11:CD004851.
12. Hazell P, Mirzaie M. Tricyclic drugs for depression in children and adolescents. *Cochrane Database Syst Rev* 2013;6:CD002317.
13. U.S. Food and Drug Administration (FDA). Suicidality in children and adolescents being treated with antidepressant medications.

1  
2  
3 www.fda.gov/drugs/drugsafety/postmarketdrugsafetyinformationforpatientsandproviders/ucm161679.  
4  
5 htm (accessed 20 Jan 2017).  
6  
7

- 8 14. National Collaborating Centre for Mental Health (UK). Depression in Children and Young People:  
9 Identification and management in primary, community and secondary care. British Psychological Society,  
10 2005; Available from [www.ncbi.nlm.nih.gov/books/NBK56425/](http://www.ncbi.nlm.nih.gov/books/NBK56425/). (accessed 20 Jan 2017).  
11  
12  
13
- 14 15. McDermott B, Baigent M, Chanen A, *et al*. Clinical practice guidelines: Depression in adolescents and  
15 young adults. Melbourne: beyondblue: the national depression initiative,  
16 2011.<https://www.bspg.com.au/dam/bsg/product?client=BEYONDBLUE&prodid=BL/0890&type=file>  
17 (accessed 20 Jan 2017).  
18  
19  
20  
21  
22
- 23 16. March J, Silva S, Petrycki S, *et al*. Fluoxetine, cognitive-behavioral therapy, and their combination for  
24 adolescents with depression: Treatment for Adolescents With Depression Study (TADS) randomized  
25 controlled trial. *JAMA* 2004; 292: 807-20.  
26  
27  
28
- 29 17. Nutt DJ, Sharpe M. Uncritical positive regard? Issues in the efficacy and safety of psychotherapy. *J*  
30 *Psychopharmacol* 2008; 22: 3-6.  
31  
32  
33
- 34 18. Linden M, Schermuly-Haupt ML. Definition, assessment and rate of psychotherapy side effects. *World*  
35 *Psychiatry* 2014; 13: 306-9.  
36  
37  
38
- 39 19. Pampallona S, Bollini P, Tibaldi G, *et al*. Combined pharmacotherapy and psychological treatment for  
40 depression: a systematic review. *Arch Gen Psychiatry*. 2004;61:714-9.  
41  
42  
43
- 44 20. de Maat SM, Dekker J, Schoevers RA, *et al*. Relative efficacy of psychotherapy and combined therapy in the  
45 treatment of depression: a meta-analysis. *Eur Psychiatry* 2007;22:1-8.  
46  
47  
48
- 49 21. Cox GR, Callahan P, Churchill R, *et al*. Psychological therapies versus antidepressant medication, alone  
50 and in combination for depression in children and adolescents. *Cochrane Database Syst Rev*  
51 2012;11:CD008324.  
52  
53  
54
- 55 22. Mavridis D, Giannatsi M, Cipriani A, *et al*. A primer on network meta-analysis with emphasis on mental  
56 health. *Evid Based Ment Health* 2015;18:40-6.  
57  
58  
59  
60

- 1  
2  
3  
4 23. Lu G, Ades AE. Combination of direct and indirect evidence in mixed treatment comparisons. *Stat Med*  
5  
6 2004;23:3105-24.  
7  
8 24. American Psychiatric Association. *Diagnostic and Statistical Manual of Mental Disorders (DSM-III)*. 3rd  
9  
10 Edition. Washington, DC: American Psychiatric Association, 1980.  
11  
12 25. American Psychiatric Association. *Diagnostic and Statistical Manual of Mental Disorders (DSM-III-R)*. 3rd  
13  
14 Edition. Washington, DC: American Psychiatric Association, 1987.  
15  
16 26. American Psychiatric Association. *Diagnostic and Statistical Manual of Mental Disorders (DSM-IV)*. 4th  
17  
18 Edition. Washington, DC: American Psychiatric Association, 1994.  
19  
20 27. World Health Organization (WHO). *The ninth revision of the international classification of diseases and related*  
21  
22 *health problems (ICD-9)*. Geneva: World Health Organization, 1978.  
23  
24 28. World Health Organization (WHO). *The tenth revision of the international classification of diseases and related*  
25  
26 *health problems (ICD-10)*. Geneva: World Health Organization, 1992.  
27  
28 29. Kaufman J, Birmaher B, Brent D, *et al*. Schedule for affective disorders and schizophrenia for school-age  
29  
30 children-present and lifetime version (K-SADS-PL): initial reliability and validity data. *J Am Acad Child*  
31  
32 *Adolesc Psychiatry* 1997;36:980-8.  
33  
34 30. Salanti G. Indirect and mixed-treatment comparison, network, or multiple-treatments meta-analysis: many  
35  
36 names, many benefits, many concerns for the next generation evidence synthesis tool. *Res Synth Meth* 2012;  
37  
38 3:80-97.  
39  
40 31. Birmaher B, Brent D, AACAP Work Group on Quality Issues, *et al*. Practice parameter for the assessment  
41  
42 and treatment of children and adolescents with depressive disorders. *J Am Acad Child Adolesc Psychiatry*  
43  
44 2007;46:1503-26.  
45  
46 32. Poznanski EO, Mokros HB. *Children's depression rating scale, revised (CDRS-R): manual*. Los Angeles:  
47  
48 Western Psychological Services, 1996.  
49  
50 33. Hamilton M. A rating scale for depression. *J Neurol Neurosurg Psychiatry* 1960;23:56-62.  
51  
52 34. Riedel M, Moller HJ, Obermeier M, *et al*. Response and remission criteria in major depression – a  
53  
54 validation of current practice. *J Psychiatr Res* 2010;44:1063-8.  
55  
56  
57  
58  
59  
60

- 1  
2  
3  
4 35. Posner K, Oquendo MA, Gould M, *et al.* Columbia Classification Algorithm of Suicide Assessment (C-  
5  
6 CASA): classification of suicidal events in the FDA's pediatric suicidal risk analysis of antidepressants. *Am*  
7  
8 *J Psychiatry* 2007;164:1035-43.  
9
- 10 36. Hammad TA. Review and evaluation of clinical data. Washington, DC, US Food and Drug  
11  
12 Administration. [http://www.fda.gov/ohrms/dockets/ac/04/briefing/2004-4065b1-10-tab08-hammads-](http://www.fda.gov/ohrms/dockets/ac/04/briefing/2004-4065b1-10-tab08-hammads-review.pdf)  
13  
14 [review.pdf](http://www.fda.gov/ohrms/dockets/ac/04/briefing/2004-4065b1-10-tab08-hammads-review.pdf) (accessed 20 Jan 2017).  
15
- 16 37. Shaffer D, Gould MS, Brasic J, *et al.* A children's global assessment scale (CGAS). *Arch Gen Psychiatry*  
17  
18 1983;40:1228-31.  
19
- 20 38. Endicott J, Spitzer RL, Fleiss JL, *et al.* The Global Assessment Scale: a procedure for measuring overall  
21  
22 severity of psychiatric disturbance. *Arch Gen Psychiatry* 1976;33:766-71.  
23
- 24 39. Endicott J, Nee J, Harrison W, *et al.* Quality of Life Enjoyment and Satisfaction Questionnaire: a new  
25  
26 measure. *Psychopharmacol Bull* 1993;29:321-6.  
27
- 28 40. Zhou X, Qin B, Whittington C, *et al.* Comparative efficacy and tolerability of first-generation and newer-  
29  
30 generation antidepressant medications for depressive disorders in children and adolescents: study  
31  
32 protocol for a systematic review and network meta-analysis. *BMJ Open* 2015;5:e007768.  
33
- 34 41. Higgins JPT, Green S. *Cochrane handbook for systematic reviews of interventions version 5.1.0* [updated March  
35  
36 2011]. The Cochrane Collaboration, 2011. <http://handbook.cochrane.org/> (accessed 20 Jan 2017).  
37  
38
- 39 42. Furukawa TA, Barbui C, Cipriani A, *et al.* Imputing missing standard deviations in meta-analyses can  
40  
41 provide accurate results. *J Clin Epidemiol* 2006;59:7-10.  
42
- 43 43. Brooks SP, Gelman A. Alternative methods for monitoring convergence of iterative simulations. *J Comput*  
44  
45 *Graph Stat* 1998;7:434-45.  
46
- 47 44. Salanti G, Ades AE, Ioannidis JP. Graphical methods and numerical summaries for presenting results from  
48  
49 multiple-treatment meta-analysis: an overview and tutorial. *J Clin Epidemiol* 2011; 64:163-71.  
50
- 51 45. Liu HY, Potter MP, Woodworth KY, *et al.* Pharmacologic treatments for pediatric bipolar disorder: a  
52  
53 review and meta-analysis. *J Am Acad Child Adolesc Psychiatry* 2011;50:749-62.  
54  
55  
56  
57  
58  
59  
60

- 1  
2  
3  
4 46. Sullivan SA, Lewis G, Gunnell D, *et al.* The longitudinal association between psychotic experiences,  
5 depression and suicidal behaviour in a population sample of adolescents. *Soc Psychiatry Psychiatr Epidemiol*  
6 2015;50:1809-17.  
7  
8  
9  
10 47. Wesselhoeft R, Sørensen MJ, Heiervang ER, *et al.* Subthreshold depression in children and adolescents - a  
11 systematic review. *J Affect Disord* 2013; 151:7-22.  
12  
13 48. Higgins JP, Thompson SG, Deeks JJ, *et al.* Measuring inconsistency in meta-analyses. *BMJ* 2003;327:557-60.  
14  
15 49. Jackson D, Barrett JK, Rice S, *et al.* A design-by-treatment interaction model for network meta-analysis  
16 with random inconsistency effects. *Stat Med* 2014; 33:3639-54.  
17  
18  
19  
20 50. Dias S, Welton NJ, Sutton AJ, *et al.* Evidence synthesis for decision making 4: inconsistency in networks of  
21 evidence based on randomized controlled trials. *Med Decis Making* 2013; 33:641-56.  
22  
23  
24 51. Higgins JP, Jackson D, Barrett JK, *et al.* Consistency and inconsistency in network meta-analysis: concepts  
25 and models for multi-arm studies. *Res Synth Methods* 2012; 3:98-110.  
26  
27  
28  
29 52. Peters JL, Sutton AJ, Jones DR, *et al.* Contour-enhanced meta-analysis funnel plots help distinguish  
30 publication bias from other causes of asymmetry. *J Clin Epidemiol* 2008;61:991-6.  
31  
32  
33 53. Salanti G, Ades AE, Ioannidis JP. Graphical methods and numerical summaries for presenting results from  
34 multiple-treatment meta-analysis: an overview and tutorial. *J Clin Epidemiol* 2011; 64: 163-71.  
35  
36  
37 54. Chaimani A, Salanti G. Using network meta-analysis to evaluate the existence of small-study effects in a  
38 network of interventions. *Res Synth Methods* 2012;3:161-76.  
39  
40  
41  
42 55. Salanti G, Del Giovane C, Chaimani A, *et al.* Evaluating the quality of evidence from a network meta-  
43 analysis. *PLoS One* 2014;9:e99682.  
44  
45  
46  
47  
48  
49  
50  
51  
52  
53  
54  
55  
56  
57  
58  
59  
60



## TABLES

Table 1 Description of Psychotherapeutic interventions and control conditions

| Interventions                          | Abbreviation | Description                                                                                                                                                                                                                                                                                                                                                                                                                               |
|----------------------------------------|--------------|-------------------------------------------------------------------------------------------------------------------------------------------------------------------------------------------------------------------------------------------------------------------------------------------------------------------------------------------------------------------------------------------------------------------------------------------|
| <i>Psychotherapeutic Intervention:</i> |              |                                                                                                                                                                                                                                                                                                                                                                                                                                           |
| Behavioral therapy                     | BT           | BT uses some kind of behavioral training and psychoeducation. BT programs provide parents and youths information about MDD and interventions; teach youths to monitor their mood, thoughts and behaviors; proposed pleasant activity scheduling and behavioral activation.                                                                                                                                                                |
| Cognitive-behavioral therapy           | CBT          | CBT is a combination of BT and CT. Additional CBT skill-building techniques are used in many programs by teaching relaxation techniques to cope with environmental stressors, providing social skills and resolution training, and teaching general problem-solving.                                                                                                                                                                      |
| Cognitive therapy                      | CT           | CT uses some kind of cognitive restructuring training. CT programs ask youths to examine their automatic thoughts and core schemas and to assess the accuracy and affective consequences of their views. They aim to teach youths to engage in "rational" thinking about themselves, the world and their possibilities for the future.                                                                                                    |
| Family therapy                         | FT           | FT works with families to nurture change and development. FT tends to view change in terms of the systems of interaction between family members. In the case of youth with MDD, FT aims at helping the family to answer the child's needs for completing age-appropriate developmental tasks to relieve depression.                                                                                                                       |
| Interpersonal therapy                  | IPT          | IPT aim at educating patients as to how their depression and the quality of interpersonal relationships affect one another and at addressing interpersonal problems that may be contributing to the depression (e.g. grief, disputes, role transitions, social deficits). Compared to its adult version, IPT in youths is shorter, involves parents, and adds a liaison role for the therapist between schools and families.              |
| Play therapy                           | PT           | PT used techniques to engage participants in recreational activities to help them cope with their problems and fears.                                                                                                                                                                                                                                                                                                                     |
| Problem-solving therapy                | PST          | PST focus on the problems participants are currently facing and on helping them find solutions to those problems.                                                                                                                                                                                                                                                                                                                         |
| Psychodynamic therapy                  | DYN          | DYN proposed patients to help understand the origin and nature of long standing problems by investigating both conscious and non-conscious thoughts and emotional feelings. DYN uses free associations and interpretation of dreams (or drawing in children), and addresses how personal history and experience may alter the patient/therapist transference. In youth MDD, a particular interest is given to psychological trauma, early |



parent/child relationships, narcissistic organization and experiences of loss.

Supportive therapy      SUP  
 SUP is an unstructured therapy without specific psychological techniques that it helped people to ventilate their experiences and emotions and offering empathy. These therapies are commonly described in the literature as either counseling or supportive therapy.

***Control conditions:***

No-treatment      NT  
 NT is a control condition in which the participants receive no active treatment during the study and in which they do not expect to receive such after the study is over.

Psychological placebo      PBO  
 PBO is a control condition that was regarded as inactive by the researchers but was to be the participants.

Treatment-as-usual      TAU  
 TAU is not considered to be structured psychotherapy but may have some treatment effects.

Waitlist      WL  
 WL is a control condition in which the participants receive no active treatment during the study but are forewarned that they can receive one after the study period is over.

---

Table 2 Hierarchy of depression symptom severity measurement scales

| Hierarchy | Depression symptom severity measurement scales                              | Abbreviation |
|-----------|-----------------------------------------------------------------------------|--------------|
| 1         | Children's Depression Rating Scale                                          | CDRS         |
| 2         | Hamilton Depression Rating Scale                                            | HAMD         |
| 3         | Montgomery Asberg Depression Rating Scale                                   | MADRS        |
| 4         | Beck Depression Inventory                                                   | BDI          |
| 5         | Children's Depression Inventory                                             | CDI          |
| 6         | Schedule for Affective Disorders and Schizophrenia for School Aged Children | K-SADS       |
| 7         | Mood and Feeling Questionnaire                                              | MFQ          |
| 8         | Reynolds Adolescent Depression Scale                                        | RADS         |
| 9         | Bellevue Index of Depression                                                | BID          |
| 10        | Child Depression Scale                                                      | CDS          |
| 11        | Centre for Epidemiologic Studies Depression Scale                           | CESD         |
| 12        | Child Assessment Schedule                                                   | CAS          |
| 13        | Child Behavior Checklist-Depression                                         | CBCL-D       |

1  
2  
3  
4  
5  
6  
7  
8  
9  
10  
11  
12  
13  
14  
15  
16  
17  
18  
19  
20  
21  
22  
23  
24  
25  
26  
27  
28  
29  
30  
31  
32  
33  
34  
35  
36  
37  
38  
39  
40  
41  
42  
43  
44  
45  
46  
47  
48  
49  
50  
51  
52  
53  
54  
55  
56  
57  
58  
59  
60

Figure 1. Possible interventions eligible for the ideal network plot

For peer review only

1  
2  
3  
4  
5  
6  
7  
8  
9  
10  
11  
12  
13  
14  
15  
16  
17  
18  
19  
20  
21  
22  
23  
24  
25  
26  
27  
28  
29  
30  
31  
32  
33  
34  
35  
36  
37  
38  
39  
40  
41  
42  
43  
44  
45  
46  
47  
48  
49  
50  
51  
52  
53  
54  
55  
56  
57  
58  
59  
60



Figure 1. Possible interventions eligible for the ideal network plot

139x102mm (300 x 300 DPI)

Review only

**PRISMA-P (Preferred Reporting Items for Systematic review and Meta-Analysis Protocols) 2015 checklist: recommended items to address in a systematic review protocol\***

| Section and topic                 | Item No | Checklist item                                                                                                                                                                                                                                                                                                                                                                                                                                                                                                                                                                                                                                                                                                                                                                                                                                                                                                                                                                                                                                                                                                                                                                                                                                                                                                                                                                                                                                                                                                                                                                                                                                                                                                                                                                                                                                                                           | Reported on Page # |
|-----------------------------------|---------|------------------------------------------------------------------------------------------------------------------------------------------------------------------------------------------------------------------------------------------------------------------------------------------------------------------------------------------------------------------------------------------------------------------------------------------------------------------------------------------------------------------------------------------------------------------------------------------------------------------------------------------------------------------------------------------------------------------------------------------------------------------------------------------------------------------------------------------------------------------------------------------------------------------------------------------------------------------------------------------------------------------------------------------------------------------------------------------------------------------------------------------------------------------------------------------------------------------------------------------------------------------------------------------------------------------------------------------------------------------------------------------------------------------------------------------------------------------------------------------------------------------------------------------------------------------------------------------------------------------------------------------------------------------------------------------------------------------------------------------------------------------------------------------------------------------------------------------------------------------------------------------|--------------------|
| <b>ADMINISTRATIVE INFORMATION</b> |         |                                                                                                                                                                                                                                                                                                                                                                                                                                                                                                                                                                                                                                                                                                                                                                                                                                                                                                                                                                                                                                                                                                                                                                                                                                                                                                                                                                                                                                                                                                                                                                                                                                                                                                                                                                                                                                                                                          |                    |
| Title:                            |         |                                                                                                                                                                                                                                                                                                                                                                                                                                                                                                                                                                                                                                                                                                                                                                                                                                                                                                                                                                                                                                                                                                                                                                                                                                                                                                                                                                                                                                                                                                                                                                                                                                                                                                                                                                                                                                                                                          |                    |
| Identification                    | 1a      | Comparative efficacy and acceptability of antidepressants, psychological interventions, and their combination for depressive disorder in children and adolescents: protocol for a network meta-analysis                                                                                                                                                                                                                                                                                                                                                                                                                                                                                                                                                                                                                                                                                                                                                                                                                                                                                                                                                                                                                                                                                                                                                                                                                                                                                                                                                                                                                                                                                                                                                                                                                                                                                  | 1                  |
| Update                            | 1b      | None                                                                                                                                                                                                                                                                                                                                                                                                                                                                                                                                                                                                                                                                                                                                                                                                                                                                                                                                                                                                                                                                                                                                                                                                                                                                                                                                                                                                                                                                                                                                                                                                                                                                                                                                                                                                                                                                                     |                    |
| Registration                      | 2       | PROSPERO CRD42015020841                                                                                                                                                                                                                                                                                                                                                                                                                                                                                                                                                                                                                                                                                                                                                                                                                                                                                                                                                                                                                                                                                                                                                                                                                                                                                                                                                                                                                                                                                                                                                                                                                                                                                                                                                                                                                                                                  | 4                  |
| Authors:                          |         |                                                                                                                                                                                                                                                                                                                                                                                                                                                                                                                                                                                                                                                                                                                                                                                                                                                                                                                                                                                                                                                                                                                                                                                                                                                                                                                                                                                                                                                                                                                                                                                                                                                                                                                                                                                                                                                                                          |                    |
| Contact                           | 3a      | Xinyu Zhou, Yuqing Zhang, Juncai Pu, Lining Yang, Peng Xie (Department of Neurology and Psychiatry, The First Affiliated Hospital of Chongqing Medical University, Chongqing, China; Institute of Neuroscience and the Collaborative Innovation Center for Brain Science, Chongqing Medical University, Chongqing, China)<br>Andrea Cipriani (Department of Psychiatry, University of Oxford, Warneford Hospital, Oxford, UK)<br>Pim Cuijpers (Department of Clinical, Neuro and Developmental Psychology, Amsterdam Public Health research institute, Vrije Universiteit Amsterdam, The Netherlands)<br>Sarah E. Hetrick (Orygen, The National Centre of Excellence in Youth Mental Health, and the Centre of Youth Mental Health, University of Melbourne, Melbourne, Australia)<br>John R. Weisz (Department of Psychology, Harvard University, Cambridge, MA, USA)<br>Cinzia Del Giovane (Department of Diagnostic, Clinical and Public Health Medicine, University of Modena and Reggio Emilia, Modena, Italy)<br>Toshiaki A. Furukawa (Department of Health Promotion and Human Behavior, Kyoto University Graduate School of Medicine and School of Public Health, Kyoto, Japan)<br>Jürgen Barth (Institute of Complementary and Integrative Medicine, University Hospital and University of Zurich, Zurich, Switzerland)<br>David Coghill (Departments of Paediatrics and Psychiatry, University of Melbourne, Melbourne, Australia)<br>Stefan Leucht (Department of Psychiatry and Psychotherapy, Technische Universität München, Munich, Germany)<br>Arun V Ravindran (Department of Psychiatry, University of Toronto, Toronto, ON, Canada)<br><br>Corresponding author :Peng Xie, Department of Neurology and Psychiatry, The First Affiliated Hospital of Chongqing Medical University, 1 Youyi Road, Yuzhong District, Chongqing 400016, China; E-mail: xiepeng973@126.com | 1-2                |
| Contributions                     | 3b      | PX, AC, and XZ conceived the study and drafted the protocol. PX, AC and XZ wrote the first draft of the manuscript. PC, SEH, JRW, CDG, TAF, JB, DC, AVR assisted in protocol design and revision. XZ, YZ, and LY participated in the search strategy                                                                                                                                                                                                                                                                                                                                                                                                                                                                                                                                                                                                                                                                                                                                                                                                                                                                                                                                                                                                                                                                                                                                                                                                                                                                                                                                                                                                                                                                                                                                                                                                                                     | 17                 |

---

development. CDG, and JP participated in the design of data synthesis and analysis. All the authors have approved the publication of the protocol.

---

|            |   |      |  |
|------------|---|------|--|
| Amendments | 4 | None |  |
|------------|---|------|--|

---

Support:

|                           |    |                                                                                                                                      |  |
|---------------------------|----|--------------------------------------------------------------------------------------------------------------------------------------|--|
| Sources                   | 5a | ational Basic Research Program of China (973 Program) (Grant No. 2009CB918300)                                                       |  |
| Sponsor                   | 5b | This work is supported by the National Basic Research Program of China (973 Program) (Grant No. 2009CB918300).                       |  |
| Role of sponsor or funder | 5c | The funders had no role in the protocol design; the writing of the protocol; or the decision to submit the protocol for publication. |  |

---

**INTRODUCTION**

|            |   |                                                                                                                                                                                                                                                                                                                                                                                                                                                                                                                                                                                                                                                                                                                                                                                                                                                                                                                                                                                              |   |
|------------|---|----------------------------------------------------------------------------------------------------------------------------------------------------------------------------------------------------------------------------------------------------------------------------------------------------------------------------------------------------------------------------------------------------------------------------------------------------------------------------------------------------------------------------------------------------------------------------------------------------------------------------------------------------------------------------------------------------------------------------------------------------------------------------------------------------------------------------------------------------------------------------------------------------------------------------------------------------------------------------------------------|---|
| Rationale  | 6 | Depressive disorder in children and adolescents is a major public health problem. The course of depressive disorder in young people is often characterised by protracted episodes, frequent recurrence, and comorbid psychiatric disorders. Several clinical practice guidelines recommend that in children and adolescents, psychotherapy should be considered as the first-line intervention for the management of depressive disorder, while pharmacological treatments are often reserved for more severe illness or when psychotherapy does not work or is not available. Nevertheless, the evidence-base for psychotherapy to be more effective and safer than antidepressants in the treatment of child and adolescent depressive disorder is not well established. In our two previous network meta-analyses the comparative efficacy and acceptability of psychotherapies and antidepressants for depressive disorder in children and adolescents have been separately investigated | 6 |
| Objectives | 7 | The aim of the current protocol is to synthesise all this evidence and provide clinicians with a reliable treatment algorithm of the commonly used psychological, and pharmacological interventions, as well as their combinations for the acute treatment of depressive disorder in children and adolescents.                                                                                                                                                                                                                                                                                                                                                                                                                                                                                                                                                                                                                                                                               | 7 |

---

**METHODS**

|                      |   |                                                                                                                                                                                                                                                                                                                                                                                                                                                                                                                                                                                                                                                                                                                                                                                                                                                                                                                                                                                                                                                                                                                                                                                                                                                                                                                                                                                                                                                                                                                                                                                                                                                                                                                                                                            |      |
|----------------------|---|----------------------------------------------------------------------------------------------------------------------------------------------------------------------------------------------------------------------------------------------------------------------------------------------------------------------------------------------------------------------------------------------------------------------------------------------------------------------------------------------------------------------------------------------------------------------------------------------------------------------------------------------------------------------------------------------------------------------------------------------------------------------------------------------------------------------------------------------------------------------------------------------------------------------------------------------------------------------------------------------------------------------------------------------------------------------------------------------------------------------------------------------------------------------------------------------------------------------------------------------------------------------------------------------------------------------------------------------------------------------------------------------------------------------------------------------------------------------------------------------------------------------------------------------------------------------------------------------------------------------------------------------------------------------------------------------------------------------------------------------------------------------------|------|
| Eligibility criteria | 8 | <p><b>Types of participants</b></p> <p>We will include studies that enrolled participants aged less than 18 years of age when they are initially enrolled in the studies, of both sexes with a diagnosis of depressive disorder based on standardised diagnostic criteria (e.g., the Diagnostic and Statistical Manual of Mental Disorders or the International Classification of Diseases). While it is accepted that subclinical depression still has a significant impact on an individuals’ social and educational functioning, we will not include studies of this population. Similarly, studies where depressive disorder was not formally diagnosed will also be excluded for the same rationale that its clinical heterogeneity could violate the transitivity assumption in NMA (i.e. one can compare indirectly intervention B and C via intervention A). We will also exclude trials in which participants are described as having psychotic depression or treatment-resistant depression, as their treatment response differs from patients without treatment resistance or symptoms of psychosis. Trials focusing on child or adolescent bipolar disorder will also be excluded, but not those involving patients with other comorbid psychiatric disorders (e.g., anxiety disorder). Where a study includes both adults and children/adolescents and the randomisation had been stratified according this variable, the data will be included if data on the depressed youths can be separately extracted from the manuscript, or can be obtained from the authors. Studies conducted in both inpatient and outpatient settings will be included. RCTs recruiting participants with an overall sample size of fewer than ten patients will be excluded.</p> | 7-10 |
|----------------------|---|----------------------------------------------------------------------------------------------------------------------------------------------------------------------------------------------------------------------------------------------------------------------------------------------------------------------------------------------------------------------------------------------------------------------------------------------------------------------------------------------------------------------------------------------------------------------------------------------------------------------------------------------------------------------------------------------------------------------------------------------------------------------------------------------------------------------------------------------------------------------------------------------------------------------------------------------------------------------------------------------------------------------------------------------------------------------------------------------------------------------------------------------------------------------------------------------------------------------------------------------------------------------------------------------------------------------------------------------------------------------------------------------------------------------------------------------------------------------------------------------------------------------------------------------------------------------------------------------------------------------------------------------------------------------------------------------------------------------------------------------------------------------------|------|

---

---

### Types of studies

Any randomised controlled trials (RCTs), including the first phase of cross-over trials as well as cluster-randomised trials, will be included. Quasi-randomised trials (e.g., those allocating participants using alternate days of the week) will be excluded. For trials of antidepressants alone, only double-blind RCTs (patients and raters blinded) will be included. As it is difficult to utilise a double-blind design for patients in trials of psychotherapy alone or the combination of antidepressant and psychotherapy, we will only include trials in which raters were blinded or participants were assessed by self-rating depression scales.

### Types of interventions

For pharmacological interventions, we will include any commonly prescribed oral antidepressants (fixed or flexible doses). These will include tricyclic antidepressants (TCAs; amitriptyline, clomipramine, nortriptyline, desipramine, imipramine, etc.), selective serotonin reuptake inhibitors (SSRIs; escitalopram, fluoxetine, paroxetine, sertraline, etc.), and serotonin-norepinephrine reuptake inhibitors (SNRIs; venlafaxine, duloxetine), as well as novel agents mirtazapine and nefazodone. In terms of psychological interventions, we will include any manualised or structured psychotherapies, e.g., behavioral therapy, cognitive-behavioral therapy, cognitive therapy, family therapy, interpersonal therapy, play therapy, problem-solving therapy, psychodynamic therapy, and supportive therapy. Also, we will include the combination of both psychological interventions and pharmacological interventions. For the pharmacological interventions, the control condition always is pill placebo, and these for psychological control conditions will include waiting-list (WL), treatment as usual (TAU), psychological placebo or attention placebo, as well as no-treatment (NT). All RCTs comparing any active intervention (psychological interventions, pharmacological interventions, or their combinations) with either active comparators or control conditions for acute treatment of depressive disorder in children and adolescents will be included. The acute phase will be defined as from 4 to 16 week. We will exclude trials with treatment duration of less than 4 weeks, because the onset of benefit for most antidepressants often takes at least 4 weeks. If a study present data for more than one time point within our pre-defined acute phase window or beyond 16 weeks, the 8-week (or the closest to 8-week) will be taken as the time. Trials comparing the same antidepressant at different therapeutic doses will be merged in the same node in the network analysis so long as they are within the dose range licensed by drug regulatory agencies. Also, trials comparing the same type of psychological interventions but at different numbers of therapeutic sessions, different delivery format (group, individual), different treatment medium (face-to-face, internet-based), and different treatment conditions (with or without family involvement) will be considered as the same node in the network analysis. We anticipate that any patient who meets all inclusion criteria, in principal, is equally likely to be randomised to any of the interventions in the synthesis comparator set.

### Types of outcome measures

#### Primary outcomes

- (1) Efficacy (as a continuous outcome), measured by the overall mean change scores on depressive symptom scales (self- or assessor-rated), e.g., Children's Depression Rating Scale (CDRS-R) and Hamilton Depression Rating Scale (HAMD) from baseline to endpoint.
- (2) Acceptability of treatment, defined as the proportion of patients who drop out of the study by any cause during the delivery of the intervention.

#### Secondary outcomes

---



1  
2  
3  
4  
5  
6  
7  
8  
9  
10  
11  
12  
13  
14  
15  
16  
17  
18  
19  
20  
21  
22  
23  
24  
25  
26  
27  
28  
29  
30  
31  
32  
33  
34  
35  
36  
37  
38  
39  
40  
41  
42  
43  
44  
45  
46  
47  
48  
49

---

(1) Efficacy (as dichotomous outcome), measured by the total number of patients who achieved the criteria of remission, defined as being below the threshold in depression rating score (e.g., less than 28 for CDRS-R), while these thresholds are different across trials.

(2) Tolerability of treatment, defined as the proportion of patients who discontinued treatment due to any adverse events during the delivery of the intervention.

(3) Suicide-related outcome, estimated by the reported cases of definitive suicidal behavior or suicidal ideation during the acute phase of treatment. The definition of suicide-related outcome is based on the Columbia Classification Algorithm of Suicide Assessment (C-CASA). For the antidepressants trials, the data on suicidality mainly referred to the Columbia re-analysis data reported in the FDA report. If trials are not included in this report, we will attempt to extract the data on suicide-related outcome from the Medicines and Healthcare products Regulatory Agency database or the pharmaceutical company website. For the psychological trials and the combination trials, we will mainly extract the data on suicidality from original text, and from related reviews.

(4) Global functional improvement, estimated by overall change scores on global assessment of functioning scales, e.g., Children's Global Assessment Scale (CGAS) and Global Assessment of Functioning Scale (GAF), or quality of life scales, e.g., Quality of Life Enjoyment and Satisfaction Questionnaire (Q-LES-Q). When data are reported on more than one measure, we will first chose data from the CGAS, then the GAF, and finally the Q-LES-Q and others.

---

|                     |   |                                                                                                                                                                                                                                                                                                                                                                                                                                                                                                                                                                                                                                                                                                                                                                                                                                                                                                                                                                                                                                                                                                                                                                                                                                                                                                                                                                                                                                                                                                                                                                                                                                                                                        |       |
|---------------------|---|----------------------------------------------------------------------------------------------------------------------------------------------------------------------------------------------------------------------------------------------------------------------------------------------------------------------------------------------------------------------------------------------------------------------------------------------------------------------------------------------------------------------------------------------------------------------------------------------------------------------------------------------------------------------------------------------------------------------------------------------------------------------------------------------------------------------------------------------------------------------------------------------------------------------------------------------------------------------------------------------------------------------------------------------------------------------------------------------------------------------------------------------------------------------------------------------------------------------------------------------------------------------------------------------------------------------------------------------------------------------------------------------------------------------------------------------------------------------------------------------------------------------------------------------------------------------------------------------------------------------------------------------------------------------------------------|-------|
| Information sources | 9 | For the identification of trials of antidepressant and psychotherapy alone for depressive disorder in children and adolescents, we will update the literature search of our two previous network meta-analyses. <sup>8,10</sup> Other eligible trials of the combinations of antidepressant and psychotherapy will be identified by searching PubMed, EMBASE, CENTRAL (Cochrane Central Register of Controlled Trials), Web of Science, PsycINFO, ProQuest, CINAHL, LiLACS from date of inception with Medical Subject Headings (MeSH) and text words. We will also search ClinicalTrials.gov in USA and other international trial registers via the International Clinical Trials Registry Platform (ICTRP) in WHO. We will also check relevant reports on the US Food and Drug Administration (FDA) website, and hand-search key journals, conference proceedings, such as, J Child Adolesc Psychopharmacol, J Am Acad Child Adolesc Psychiatry, Child Adolesc Psychiatry Ment Health, Psychopharmacol Bull, Arch Gen Psychiatry, Am J Psychiatry, Eur Psychiatry, Depress Anxiety. There will be no restrictions on language, or publication year. Additional relevant studies will be obtained by scanning reference lists of trials identified in the initial searches and relevant review papers. We will also inquire at the relative pharmaceutical companies (e.g., GlaxoSmithKline, Lilly, Organon, Forest Pharmaceuticals, Bristol-Myers Squibb) and search their websites for unpublished data. All relevant experts and principal manufacturers will be contacted to supplement incomplete reports of the original papers or to provide new data for unpublished studies. | 11-12 |
|---------------------|---|----------------------------------------------------------------------------------------------------------------------------------------------------------------------------------------------------------------------------------------------------------------------------------------------------------------------------------------------------------------------------------------------------------------------------------------------------------------------------------------------------------------------------------------------------------------------------------------------------------------------------------------------------------------------------------------------------------------------------------------------------------------------------------------------------------------------------------------------------------------------------------------------------------------------------------------------------------------------------------------------------------------------------------------------------------------------------------------------------------------------------------------------------------------------------------------------------------------------------------------------------------------------------------------------------------------------------------------------------------------------------------------------------------------------------------------------------------------------------------------------------------------------------------------------------------------------------------------------------------------------------------------------------------------------------------------|-------|

---

|                 |    |                                                                                                                                                                                                                                                                                                                                                                                                                                                                                                                                                                                                                                                                                                                                                                                                                                 |    |
|-----------------|----|---------------------------------------------------------------------------------------------------------------------------------------------------------------------------------------------------------------------------------------------------------------------------------------------------------------------------------------------------------------------------------------------------------------------------------------------------------------------------------------------------------------------------------------------------------------------------------------------------------------------------------------------------------------------------------------------------------------------------------------------------------------------------------------------------------------------------------|----|
| Search strategy | 10 | (depress* or dysthymi* or mood disorder* or affective disorder*) and (adolesc* or child* or boy* or girl* or juvenil* or minors or paediatric* or pediatri* or pubescen* or school* or student* or teen* or young or youth*) and (“selective serotonin reuptake inhibitor*” or SSRIs or “serotonin norepinephrine reuptake inhibitor*” or SNRIs or citalopram or fluoxetine or paroxetine or sertraline or escitalopram or fluvoxamine or venlafaxine or duloxetine “noradrenergic and specific serotonergic antidepressants” or NaSSA or mirtazapine or TCA or tricyclic or amitriptyline or clomipramine or desipramine or imipramine or nortriptyline) and (psychotherapy* or behavio* or “family therap*” or CBT or cognitive or interpersonal or IPT or “play therap*” or supportive or problem-solving or psychodynamic). | 11 |
|-----------------|----|---------------------------------------------------------------------------------------------------------------------------------------------------------------------------------------------------------------------------------------------------------------------------------------------------------------------------------------------------------------------------------------------------------------------------------------------------------------------------------------------------------------------------------------------------------------------------------------------------------------------------------------------------------------------------------------------------------------------------------------------------------------------------------------------------------------------------------|----|

---

Study records:

---



|    |                             |     |                                                                                                                                                                                                                                                                                                                                                                                                                                                                                                                                                                                                                                                                                                                                                                                                                                                                                                                                                                                                                                                                                                                                                                                                                                                                                                                                                                                                                                                                                                                                                                                                                                                                                                                                                                                                                                                                                                                                                                                                                                                                                                                                       |       |
|----|-----------------------------|-----|---------------------------------------------------------------------------------------------------------------------------------------------------------------------------------------------------------------------------------------------------------------------------------------------------------------------------------------------------------------------------------------------------------------------------------------------------------------------------------------------------------------------------------------------------------------------------------------------------------------------------------------------------------------------------------------------------------------------------------------------------------------------------------------------------------------------------------------------------------------------------------------------------------------------------------------------------------------------------------------------------------------------------------------------------------------------------------------------------------------------------------------------------------------------------------------------------------------------------------------------------------------------------------------------------------------------------------------------------------------------------------------------------------------------------------------------------------------------------------------------------------------------------------------------------------------------------------------------------------------------------------------------------------------------------------------------------------------------------------------------------------------------------------------------------------------------------------------------------------------------------------------------------------------------------------------------------------------------------------------------------------------------------------------------------------------------------------------------------------------------------------------|-------|
| 1  |                             |     |                                                                                                                                                                                                                                                                                                                                                                                                                                                                                                                                                                                                                                                                                                                                                                                                                                                                                                                                                                                                                                                                                                                                                                                                                                                                                                                                                                                                                                                                                                                                                                                                                                                                                                                                                                                                                                                                                                                                                                                                                                                                                                                                       |       |
| 2  |                             |     |                                                                                                                                                                                                                                                                                                                                                                                                                                                                                                                                                                                                                                                                                                                                                                                                                                                                                                                                                                                                                                                                                                                                                                                                                                                                                                                                                                                                                                                                                                                                                                                                                                                                                                                                                                                                                                                                                                                                                                                                                                                                                                                                       |       |
| 3  |                             |     |                                                                                                                                                                                                                                                                                                                                                                                                                                                                                                                                                                                                                                                                                                                                                                                                                                                                                                                                                                                                                                                                                                                                                                                                                                                                                                                                                                                                                                                                                                                                                                                                                                                                                                                                                                                                                                                                                                                                                                                                                                                                                                                                       |       |
| 4  |                             |     |                                                                                                                                                                                                                                                                                                                                                                                                                                                                                                                                                                                                                                                                                                                                                                                                                                                                                                                                                                                                                                                                                                                                                                                                                                                                                                                                                                                                                                                                                                                                                                                                                                                                                                                                                                                                                                                                                                                                                                                                                                                                                                                                       |       |
| 5  | Data management             | 11a | Literature search results will be imported to Endnote and the duplicates will be removed during the study selection process. We will screening citations based on the inclusion and exclusion criteria.                                                                                                                                                                                                                                                                                                                                                                                                                                                                                                                                                                                                                                                                                                                                                                                                                                                                                                                                                                                                                                                                                                                                                                                                                                                                                                                                                                                                                                                                                                                                                                                                                                                                                                                                                                                                                                                                                                                               | 12    |
| 6  |                             |     |                                                                                                                                                                                                                                                                                                                                                                                                                                                                                                                                                                                                                                                                                                                                                                                                                                                                                                                                                                                                                                                                                                                                                                                                                                                                                                                                                                                                                                                                                                                                                                                                                                                                                                                                                                                                                                                                                                                                                                                                                                                                                                                                       |       |
| 7  | Selection process           | 11b | Titles and abstracts identified from the search strategies will be independently examined by two reviewers (XZ and YZ). If both reviewers judge that the trial does not meet eligibility criteria, we will exclude it. Then, we will obtain the full-texts of all remaining articles and determine whether to include them according to inclusion criteria described above. We will calculate the inter-rater reliability of the two raters. Any disagreements will be resolved by a third review author (AC or PX) or by consultation with the authors of the articles. The reasons for exclusion of trials will be reported in the characteristics of excluded studies list.                                                                                                                                                                                                                                                                                                                                                                                                                                                                                                                                                                                                                                                                                                                                                                                                                                                                                                                                                                                                                                                                                                                                                                                                                                                                                                                                                                                                                                                        | 12    |
| 8  |                             |     |                                                                                                                                                                                                                                                                                                                                                                                                                                                                                                                                                                                                                                                                                                                                                                                                                                                                                                                                                                                                                                                                                                                                                                                                                                                                                                                                                                                                                                                                                                                                                                                                                                                                                                                                                                                                                                                                                                                                                                                                                                                                                                                                       |       |
| 9  |                             |     |                                                                                                                                                                                                                                                                                                                                                                                                                                                                                                                                                                                                                                                                                                                                                                                                                                                                                                                                                                                                                                                                                                                                                                                                                                                                                                                                                                                                                                                                                                                                                                                                                                                                                                                                                                                                                                                                                                                                                                                                                                                                                                                                       |       |
| 10 |                             |     |                                                                                                                                                                                                                                                                                                                                                                                                                                                                                                                                                                                                                                                                                                                                                                                                                                                                                                                                                                                                                                                                                                                                                                                                                                                                                                                                                                                                                                                                                                                                                                                                                                                                                                                                                                                                                                                                                                                                                                                                                                                                                                                                       |       |
| 11 |                             |     |                                                                                                                                                                                                                                                                                                                                                                                                                                                                                                                                                                                                                                                                                                                                                                                                                                                                                                                                                                                                                                                                                                                                                                                                                                                                                                                                                                                                                                                                                                                                                                                                                                                                                                                                                                                                                                                                                                                                                                                                                                                                                                                                       |       |
| 12 | Data collection process     | 11c | Two independent reviewers (XZ and YZ) will extract the data from each included trial using standardised data extraction forms. We will assess and report the reliability of the reviewers' data extraction on each coded variable. Any disagreements will be resolved by a third review author (AC or PX). Where necessary, the authors of the studies will be contacted for further information.                                                                                                                                                                                                                                                                                                                                                                                                                                                                                                                                                                                                                                                                                                                                                                                                                                                                                                                                                                                                                                                                                                                                                                                                                                                                                                                                                                                                                                                                                                                                                                                                                                                                                                                                     | 12-13 |
| 13 |                             |     |                                                                                                                                                                                                                                                                                                                                                                                                                                                                                                                                                                                                                                                                                                                                                                                                                                                                                                                                                                                                                                                                                                                                                                                                                                                                                                                                                                                                                                                                                                                                                                                                                                                                                                                                                                                                                                                                                                                                                                                                                                                                                                                                       |       |
| 14 | Data items                  | 12  | Study characteristics (e.g., first listed author, publication year, title, publication type, publication journal, country, and sponsor), patient characteristics (e.g., diagnostic criteria, comorbidities, the age of patients, patient setting, the number of patients, the gender of patients, and severity of depression at baseline), intervention details (e.g., the type of intervention, the treatment duration, the dose of antidepressant agent, the length and number of sessions of psychotherapy, treatment delivery and treatment medium of psychotherapy) and outcome measures (primary outcomes and secondary outcomes).                                                                                                                                                                                                                                                                                                                                                                                                                                                                                                                                                                                                                                                                                                                                                                                                                                                                                                                                                                                                                                                                                                                                                                                                                                                                                                                                                                                                                                                                                              | 12    |
| 15 |                             |     |                                                                                                                                                                                                                                                                                                                                                                                                                                                                                                                                                                                                                                                                                                                                                                                                                                                                                                                                                                                                                                                                                                                                                                                                                                                                                                                                                                                                                                                                                                                                                                                                                                                                                                                                                                                                                                                                                                                                                                                                                                                                                                                                       |       |
| 16 |                             |     |                                                                                                                                                                                                                                                                                                                                                                                                                                                                                                                                                                                                                                                                                                                                                                                                                                                                                                                                                                                                                                                                                                                                                                                                                                                                                                                                                                                                                                                                                                                                                                                                                                                                                                                                                                                                                                                                                                                                                                                                                                                                                                                                       |       |
| 17 |                             |     |                                                                                                                                                                                                                                                                                                                                                                                                                                                                                                                                                                                                                                                                                                                                                                                                                                                                                                                                                                                                                                                                                                                                                                                                                                                                                                                                                                                                                                                                                                                                                                                                                                                                                                                                                                                                                                                                                                                                                                                                                                                                                                                                       |       |
| 18 |                             |     |                                                                                                                                                                                                                                                                                                                                                                                                                                                                                                                                                                                                                                                                                                                                                                                                                                                                                                                                                                                                                                                                                                                                                                                                                                                                                                                                                                                                                                                                                                                                                                                                                                                                                                                                                                                                                                                                                                                                                                                                                                                                                                                                       |       |
| 19 |                             |     |                                                                                                                                                                                                                                                                                                                                                                                                                                                                                                                                                                                                                                                                                                                                                                                                                                                                                                                                                                                                                                                                                                                                                                                                                                                                                                                                                                                                                                                                                                                                                                                                                                                                                                                                                                                                                                                                                                                                                                                                                                                                                                                                       |       |
| 20 | Outcomes and prioritization | 13  | Primary outcomes<br>(1) Efficacy (as a continuous outcome), measured by the overall mean change scores on depressive symptom scales (self- or assessor-rated), e.g., Children's Depression Rating Scale (CDRS-R) and Hamilton Depression Rating Scale (HAMD) from baseline to endpoint.<br>(2) Acceptability of treatment, defined as the proportion of patients who drop out of the study by any cause during the delivery of the intervention.<br>Secondary outcomes<br>(1) Efficacy (as dichotomous outcome), measured by the total number of patients who achieved the criteria of remission, defined as being below the threshold in depression rating score (e.g., less than 28 for CDRS-R), while these thresholds are different across trials.<br>(2) Tolerability of treatment, defined as the proportion of patients who discontinued treatment due to any adverse events during the delivery of the intervention.<br>(3) Suicide-related outcome, estimated by the reported cases of definitive suicidal behavior or suicidal ideation during the acute phase of treatment. The definition of suicide-related outcome is based on the Columbia Classification Algorithm of Suicide Assessment (C-CASA). For the antidepressants trials, the data on suicidality mainly referred to the Columbia re-analysis data reported in the FDA report. If trials are not included in this report, we will attempt to extract the data on suicide-related outcome from the Medicines and Healthcare products Regulatory Agency database or the pharmaceutical company website. For the psychological trials and the combination trials, we will mainly extract the data on suicidality from original text, and from related reviews.<br>(4) Global functional improvement, estimated by overall change scores on global assessment of functioning scales, e.g., Children's Global Assessment Scale (CGAS) and Global Assessment of Functioning Scale (GAF), or quality of life scales, e.g., Quality of Life Enjoyment and Satisfaction Questionnaire (Q-LES-Q). When data are reported on more than one measure, we will first chose | 10-11 |
| 21 |                             |     |                                                                                                                                                                                                                                                                                                                                                                                                                                                                                                                                                                                                                                                                                                                                                                                                                                                                                                                                                                                                                                                                                                                                                                                                                                                                                                                                                                                                                                                                                                                                                                                                                                                                                                                                                                                                                                                                                                                                                                                                                                                                                                                                       |       |
| 22 |                             |     |                                                                                                                                                                                                                                                                                                                                                                                                                                                                                                                                                                                                                                                                                                                                                                                                                                                                                                                                                                                                                                                                                                                                                                                                                                                                                                                                                                                                                                                                                                                                                                                                                                                                                                                                                                                                                                                                                                                                                                                                                                                                                                                                       |       |
| 23 |                             |     |                                                                                                                                                                                                                                                                                                                                                                                                                                                                                                                                                                                                                                                                                                                                                                                                                                                                                                                                                                                                                                                                                                                                                                                                                                                                                                                                                                                                                                                                                                                                                                                                                                                                                                                                                                                                                                                                                                                                                                                                                                                                                                                                       |       |
| 24 |                             |     |                                                                                                                                                                                                                                                                                                                                                                                                                                                                                                                                                                                                                                                                                                                                                                                                                                                                                                                                                                                                                                                                                                                                                                                                                                                                                                                                                                                                                                                                                                                                                                                                                                                                                                                                                                                                                                                                                                                                                                                                                                                                                                                                       |       |
| 25 |                             |     |                                                                                                                                                                                                                                                                                                                                                                                                                                                                                                                                                                                                                                                                                                                                                                                                                                                                                                                                                                                                                                                                                                                                                                                                                                                                                                                                                                                                                                                                                                                                                                                                                                                                                                                                                                                                                                                                                                                                                                                                                                                                                                                                       |       |
| 26 |                             |     |                                                                                                                                                                                                                                                                                                                                                                                                                                                                                                                                                                                                                                                                                                                                                                                                                                                                                                                                                                                                                                                                                                                                                                                                                                                                                                                                                                                                                                                                                                                                                                                                                                                                                                                                                                                                                                                                                                                                                                                                                                                                                                                                       |       |
| 27 |                             |     |                                                                                                                                                                                                                                                                                                                                                                                                                                                                                                                                                                                                                                                                                                                                                                                                                                                                                                                                                                                                                                                                                                                                                                                                                                                                                                                                                                                                                                                                                                                                                                                                                                                                                                                                                                                                                                                                                                                                                                                                                                                                                                                                       |       |
| 28 |                             |     |                                                                                                                                                                                                                                                                                                                                                                                                                                                                                                                                                                                                                                                                                                                                                                                                                                                                                                                                                                                                                                                                                                                                                                                                                                                                                                                                                                                                                                                                                                                                                                                                                                                                                                                                                                                                                                                                                                                                                                                                                                                                                                                                       |       |
| 29 |                             |     |                                                                                                                                                                                                                                                                                                                                                                                                                                                                                                                                                                                                                                                                                                                                                                                                                                                                                                                                                                                                                                                                                                                                                                                                                                                                                                                                                                                                                                                                                                                                                                                                                                                                                                                                                                                                                                                                                                                                                                                                                                                                                                                                       |       |
| 30 |                             |     |                                                                                                                                                                                                                                                                                                                                                                                                                                                                                                                                                                                                                                                                                                                                                                                                                                                                                                                                                                                                                                                                                                                                                                                                                                                                                                                                                                                                                                                                                                                                                                                                                                                                                                                                                                                                                                                                                                                                                                                                                                                                                                                                       |       |
| 31 |                             |     |                                                                                                                                                                                                                                                                                                                                                                                                                                                                                                                                                                                                                                                                                                                                                                                                                                                                                                                                                                                                                                                                                                                                                                                                                                                                                                                                                                                                                                                                                                                                                                                                                                                                                                                                                                                                                                                                                                                                                                                                                                                                                                                                       |       |
| 32 |                             |     |                                                                                                                                                                                                                                                                                                                                                                                                                                                                                                                                                                                                                                                                                                                                                                                                                                                                                                                                                                                                                                                                                                                                                                                                                                                                                                                                                                                                                                                                                                                                                                                                                                                                                                                                                                                                                                                                                                                                                                                                                                                                                                                                       |       |
| 33 |                             |     |                                                                                                                                                                                                                                                                                                                                                                                                                                                                                                                                                                                                                                                                                                                                                                                                                                                                                                                                                                                                                                                                                                                                                                                                                                                                                                                                                                                                                                                                                                                                                                                                                                                                                                                                                                                                                                                                                                                                                                                                                                                                                                                                       |       |
| 34 |                             |     |                                                                                                                                                                                                                                                                                                                                                                                                                                                                                                                                                                                                                                                                                                                                                                                                                                                                                                                                                                                                                                                                                                                                                                                                                                                                                                                                                                                                                                                                                                                                                                                                                                                                                                                                                                                                                                                                                                                                                                                                                                                                                                                                       |       |
| 35 |                             |     |                                                                                                                                                                                                                                                                                                                                                                                                                                                                                                                                                                                                                                                                                                                                                                                                                                                                                                                                                                                                                                                                                                                                                                                                                                                                                                                                                                                                                                                                                                                                                                                                                                                                                                                                                                                                                                                                                                                                                                                                                                                                                                                                       |       |
| 36 |                             |     |                                                                                                                                                                                                                                                                                                                                                                                                                                                                                                                                                                                                                                                                                                                                                                                                                                                                                                                                                                                                                                                                                                                                                                                                                                                                                                                                                                                                                                                                                                                                                                                                                                                                                                                                                                                                                                                                                                                                                                                                                                                                                                                                       |       |
| 37 |                             |     |                                                                                                                                                                                                                                                                                                                                                                                                                                                                                                                                                                                                                                                                                                                                                                                                                                                                                                                                                                                                                                                                                                                                                                                                                                                                                                                                                                                                                                                                                                                                                                                                                                                                                                                                                                                                                                                                                                                                                                                                                                                                                                                                       |       |
| 38 |                             |     |                                                                                                                                                                                                                                                                                                                                                                                                                                                                                                                                                                                                                                                                                                                                                                                                                                                                                                                                                                                                                                                                                                                                                                                                                                                                                                                                                                                                                                                                                                                                                                                                                                                                                                                                                                                                                                                                                                                                                                                                                                                                                                                                       |       |
| 39 |                             |     |                                                                                                                                                                                                                                                                                                                                                                                                                                                                                                                                                                                                                                                                                                                                                                                                                                                                                                                                                                                                                                                                                                                                                                                                                                                                                                                                                                                                                                                                                                                                                                                                                                                                                                                                                                                                                                                                                                                                                                                                                                                                                                                                       |       |
| 40 |                             |     |                                                                                                                                                                                                                                                                                                                                                                                                                                                                                                                                                                                                                                                                                                                                                                                                                                                                                                                                                                                                                                                                                                                                                                                                                                                                                                                                                                                                                                                                                                                                                                                                                                                                                                                                                                                                                                                                                                                                                                                                                                                                                                                                       |       |
| 41 |                             |     |                                                                                                                                                                                                                                                                                                                                                                                                                                                                                                                                                                                                                                                                                                                                                                                                                                                                                                                                                                                                                                                                                                                                                                                                                                                                                                                                                                                                                                                                                                                                                                                                                                                                                                                                                                                                                                                                                                                                                                                                                                                                                                                                       |       |
| 42 |                             |     |                                                                                                                                                                                                                                                                                                                                                                                                                                                                                                                                                                                                                                                                                                                                                                                                                                                                                                                                                                                                                                                                                                                                                                                                                                                                                                                                                                                                                                                                                                                                                                                                                                                                                                                                                                                                                                                                                                                                                                                                                                                                                                                                       |       |
| 43 |                             |     |                                                                                                                                                                                                                                                                                                                                                                                                                                                                                                                                                                                                                                                                                                                                                                                                                                                                                                                                                                                                                                                                                                                                                                                                                                                                                                                                                                                                                                                                                                                                                                                                                                                                                                                                                                                                                                                                                                                                                                                                                                                                                                                                       |       |
| 44 |                             |     |                                                                                                                                                                                                                                                                                                                                                                                                                                                                                                                                                                                                                                                                                                                                                                                                                                                                                                                                                                                                                                                                                                                                                                                                                                                                                                                                                                                                                                                                                                                                                                                                                                                                                                                                                                                                                                                                                                                                                                                                                                                                                                                                       |       |
| 45 |                             |     |                                                                                                                                                                                                                                                                                                                                                                                                                                                                                                                                                                                                                                                                                                                                                                                                                                                                                                                                                                                                                                                                                                                                                                                                                                                                                                                                                                                                                                                                                                                                                                                                                                                                                                                                                                                                                                                                                                                                                                                                                                                                                                                                       |       |
| 46 |                             |     |                                                                                                                                                                                                                                                                                                                                                                                                                                                                                                                                                                                                                                                                                                                                                                                                                                                                                                                                                                                                                                                                                                                                                                                                                                                                                                                                                                                                                                                                                                                                                                                                                                                                                                                                                                                                                                                                                                                                                                                                                                                                                                                                       |       |
| 47 |                             |     |                                                                                                                                                                                                                                                                                                                                                                                                                                                                                                                                                                                                                                                                                                                                                                                                                                                                                                                                                                                                                                                                                                                                                                                                                                                                                                                                                                                                                                                                                                                                                                                                                                                                                                                                                                                                                                                                                                                                                                                                                                                                                                                                       |       |
| 48 |                             |     |                                                                                                                                                                                                                                                                                                                                                                                                                                                                                                                                                                                                                                                                                                                                                                                                                                                                                                                                                                                                                                                                                                                                                                                                                                                                                                                                                                                                                                                                                                                                                                                                                                                                                                                                                                                                                                                                                                                                                                                                                                                                                                                                       |       |
| 49 |                             |     |                                                                                                                                                                                                                                                                                                                                                                                                                                                                                                                                                                                                                                                                                                                                                                                                                                                                                                                                                                                                                                                                                                                                                                                                                                                                                                                                                                                                                                                                                                                                                                                                                                                                                                                                                                                                                                                                                                                                                                                                                                                                                                                                       |       |

|                                    |     |                                                                                                                                                                                                                                                                                                                                                                                                                                                                                                                                                                                                                                                                                                                                                                                                                                                                                                                                                                                                                                                                                                                                                                                                                                                                                                                                                                                                                                                                                                                                                                                                                                                                                                                                                                                                                                                                                                                                                                                                                                                                                                                                                                                                         |       |
|------------------------------------|-----|---------------------------------------------------------------------------------------------------------------------------------------------------------------------------------------------------------------------------------------------------------------------------------------------------------------------------------------------------------------------------------------------------------------------------------------------------------------------------------------------------------------------------------------------------------------------------------------------------------------------------------------------------------------------------------------------------------------------------------------------------------------------------------------------------------------------------------------------------------------------------------------------------------------------------------------------------------------------------------------------------------------------------------------------------------------------------------------------------------------------------------------------------------------------------------------------------------------------------------------------------------------------------------------------------------------------------------------------------------------------------------------------------------------------------------------------------------------------------------------------------------------------------------------------------------------------------------------------------------------------------------------------------------------------------------------------------------------------------------------------------------------------------------------------------------------------------------------------------------------------------------------------------------------------------------------------------------------------------------------------------------------------------------------------------------------------------------------------------------------------------------------------------------------------------------------------------------|-------|
|                                    |     | data from the CGAS, then the GAF, and finally the Q-LES-Q and others.<br>Where depression symptoms are measured using more than one depression scale in a trial, we will extract data from the depressive scales on the basis of a hierarchy of rating scales. The hierarchy will be based on psychometric properties and appropriateness for use with children and adolescents and for consistency of use across trials (referred from the Zhou et al study). We will also establish a hierarchy of informants of depressive rating scales, with the clinician report first in the hierarchy, and then the child or adolescent self-report.                                                                                                                                                                                                                                                                                                                                                                                                                                                                                                                                                                                                                                                                                                                                                                                                                                                                                                                                                                                                                                                                                                                                                                                                                                                                                                                                                                                                                                                                                                                                                            |       |
| Risk of bias in individual studies | 14  | We will assess risk of bias as “low risk”, “unclear risk”, or “high risk”, in accordance with the Cochrane Collaboration’s Risk of bias tool as described in the Cochrane Hand book for Systematic Reviews of Interventions. The following items will be assessed: sequence generation, allocation concealment, blinding of participants and personnel, blinding of outcome assessors, incomplete outcome data, selective outcome reporting, and other sources of bias (e.g., sponsorship bias/researcher allegiance bias). Two independent review authors (XZ and YZ) will assess the risk of bias in selected studies. Degree of agreement between the two independent raters will be reported. Any disagreements will be resolved by a third review author (AC or PX). Where necessary, the authors of the studies will be contacted for further information. Studies will be classified as having high risk of bias if two or more domains were rated as high risk of bias; low if five or more were rated as low risk of bias and none was rated as high risk of bias, and all other cases will be assumed to pertain to moderate risk.                                                                                                                                                                                                                                                                                                                                                                                                                                                                                                                                                                                                                                                                                                                                                                                                                                                                                                                                                                                                                                                            | 13    |
| Data synthesis                     | 15a | We will perform Bayesian network meta-analysis to compare the relative outcomes of different antidepressant medications, psychotherapies or their combination from the median of the posterior distribution.                                                                                                                                                                                                                                                                                                                                                                                                                                                                                                                                                                                                                                                                                                                                                                                                                                                                                                                                                                                                                                                                                                                                                                                                                                                                                                                                                                                                                                                                                                                                                                                                                                                                                                                                                                                                                                                                                                                                                                                            | 13    |
|                                    | 15b | Network meta-analysis combines direct and indirect evidence for all relative treatment effects and provides estimates with maximum power. First, we will perform pairwise meta-analyses of direct evidence using the random-effects model with STATA version 14.0. Second, we will also perform a random-effects network meta-analysis (NMA) within a Bayesian framework using Markov chain Monte Carlo in WinBUGS version 1.4.3. Where different measures are used to assess the same outcome, continuous outcomes data will be pooled with standardised mean difference (SMD), and dichotomous outcomes will be analysed by calculating the odds ratio (OR). In the presence of minimally informative priors, Credible Intervals (CrIs) can be interpreted similarly to confidence intervals (CIs).<br>Missing dichotomous outcome data will be managed according to the intention to treat (ITT) principle, and all the dropouts after randomisation will be considered to be non-responders. Missing continuous outcome data will be analysed using the completer data. When p-values, t-values, confidence intervals or standard errors are reported in articles, SD will be calculated from their values. Where SDs are missing, attempts will be made to obtain these data through contacting trial authors. When this fails, they will be borrowed from the other trials in the network or from other published reports.<br>In the analysis of network meta-analysis, the pooled estimates will be obtained using the Markov Chains Monte Carlo method. Two Markov chains will be run simultaneously with different arbitrarily chosen initial values and non-informative priors will be used for the parameters. To ensure convergence, trace plots and the Brooks-Gelman-Rubin statistic will be assessed. We will also estimate the ranking probabilities for all treatments of being at each possible rank for each intervention. Then, we will obtain a treatment hierarchy using the surface under the cumulative ranking curve (SUCRA) and mean ranks. SUCRA can also be interpreted as the percentage of efficacy/safety of a treatment that would be ranked first without uncertainty. | 13-14 |
|                                    | 15c | Where possible, we will conduct the network meta-regression meta-analyses of data on primary outcomes for the: (i) age of participants (children vs. adolescents); (ii) sex ratio; (iii) the severity of depressive symptoms at baseline; and (iv) the treatment duration. If possible, we will do some extra subgroup analyses according to the results of heterogeneity and inconsistency. In the                                                                                                                                                                                                                                                                                                                                                                                                                                                                                                                                                                                                                                                                                                                                                                                                                                                                                                                                                                                                                                                                                                                                                                                                                                                                                                                                                                                                                                                                                                                                                                                                                                                                                                                                                                                                     | 15-16 |

1  
2  
3  
4  
5  
6  
7  
8  
9  
10  
11  
12  
13  
14  
15  
16  
17  
18  
19  
20  
21  
22  
23  
24  
25  
26  
27  
28  
29  
30  
31  
32  
33  
34  
35  
36  
37  
38  
39  
40  
41  
42  
43  
44  
45  
46  
47  
48  
49

|                                   |     |                                                                                                                                                                                                                                                                                                                                                                                                                                     |    |
|-----------------------------------|-----|-------------------------------------------------------------------------------------------------------------------------------------------------------------------------------------------------------------------------------------------------------------------------------------------------------------------------------------------------------------------------------------------------------------------------------------|----|
|                                   |     | sensitivity analysis, trials where missing data have been imputed will be excluded, and trials where high risk of bias rating have been assessed will be excluded. And, we will not only test whether the results change but also if transitivity (consistency/model fit) is affected. We will also examine some variables (e.g., sample size of trials <sup>53</sup> ), as continuous measure in meta-regression analyses.         |    |
|                                   | 15d | A systematic narrative synthesis will be provided with information presented in the text and tables to summarize and explain the characteristics and findings of the included studies.                                                                                                                                                                                                                                              | 15 |
| Meta-bias(es)                     | 16  | We will use the contour-enhanced funnel plot and Egger's test to assess risk of publication bias within each pairwise comparison. We will also use the comparison-adjusted funnel plots of all trials with placebo controls or inactive controls to investigate whether results in imprecise trials differ from those in more precise trials in network meta-analysis.                                                              | 15 |
| Confidence in cumulative evidence | 17  | We will also assess the quality of evidence contributing to primary outcomes with the GRADE framework, which characterises the quality of a body of evidence on the basis of the study limitations, imprecision, heterogeneity or inconsistency, indirectness, and publication bias. The starting point for confidence in each network estimate is high, but will be downgraded according to the assessments of these five aspects. | 16 |

**\* It is strongly recommended that this checklist be read in conjunction with the PRISMA-P Explanation and Elaboration (cite when available) for important clarification on the items. Amendments to a review protocol should be tracked and dated. The copyright for PRISMA-P (including checklist) is held by the PRISMA-P Group and is distributed under a Creative Commons Attribution Licence 4.0.**

*From: Shamseer L, Moher D, Clarke M, Ghersi D, Liberati A, Petticrew M, Shekelle P, Stewart L, PRISMA-P Group. Preferred reporting items for systematic review and meta-analysis protocols (PRISMA-P) 2015: elaboration and explanation. BMJ. 2015 Jan 2;349(jan02 1):g7647.*

# BMJ Open

## Comparative efficacy and acceptability of antidepressants, psychological interventions, and their combination for depressive disorder in children and adolescents: protocol for a network meta-analysis



|                                 |                                                                                                                                                                                                                                                                                                                                                                                                                                                                                                                                                                                                                                                                                                                                                                                                                                                                                                                                                                                                                                                                                                                                                                                                                                                                                                                                                                                                                                                                                                                                                                                                                                                                                                                                                                                                                           |
|---------------------------------|---------------------------------------------------------------------------------------------------------------------------------------------------------------------------------------------------------------------------------------------------------------------------------------------------------------------------------------------------------------------------------------------------------------------------------------------------------------------------------------------------------------------------------------------------------------------------------------------------------------------------------------------------------------------------------------------------------------------------------------------------------------------------------------------------------------------------------------------------------------------------------------------------------------------------------------------------------------------------------------------------------------------------------------------------------------------------------------------------------------------------------------------------------------------------------------------------------------------------------------------------------------------------------------------------------------------------------------------------------------------------------------------------------------------------------------------------------------------------------------------------------------------------------------------------------------------------------------------------------------------------------------------------------------------------------------------------------------------------------------------------------------------------------------------------------------------------|
| Journal:                        | <i>BMJ Open</i>                                                                                                                                                                                                                                                                                                                                                                                                                                                                                                                                                                                                                                                                                                                                                                                                                                                                                                                                                                                                                                                                                                                                                                                                                                                                                                                                                                                                                                                                                                                                                                                                                                                                                                                                                                                                           |
| Manuscript ID                   | bmjopen-2017-016608.R2                                                                                                                                                                                                                                                                                                                                                                                                                                                                                                                                                                                                                                                                                                                                                                                                                                                                                                                                                                                                                                                                                                                                                                                                                                                                                                                                                                                                                                                                                                                                                                                                                                                                                                                                                                                                    |
| Article Type:                   | Protocol                                                                                                                                                                                                                                                                                                                                                                                                                                                                                                                                                                                                                                                                                                                                                                                                                                                                                                                                                                                                                                                                                                                                                                                                                                                                                                                                                                                                                                                                                                                                                                                                                                                                                                                                                                                                                  |
| Date Submitted by the Author:   | 30-May-2017                                                                                                                                                                                                                                                                                                                                                                                                                                                                                                                                                                                                                                                                                                                                                                                                                                                                                                                                                                                                                                                                                                                                                                                                                                                                                                                                                                                                                                                                                                                                                                                                                                                                                                                                                                                                               |
| Complete List of Authors:       | Zhou, Xinyu; The First Affiliated Hospital of Chongqing Medical University, Department of Psychiatry<br>Cipriani, Andrea; University of Oxford, Department of Psychiatry; Warneford Hospital, Oxford Health NHS Foundation Trust<br>Zhang, Yuqing; The First Affiliated Hospital of Chongqing Medical University, Department of Neurology<br>Cuijpers, Pim; Vrije Universiteit Amsterdam, Department of Clinical, Neuro and Developmental Psychology, Amsterdam Public Health research institute<br>Hetrick, Sarah; University of Melbourne, Orygen, The National Centre of Excellence in Youth Mental Health, and the Centre of Youth Mental Health<br>Weisz, John; Harvard University, Department of Psychology<br>Pu, Juncai; The First Affiliated Hospital of Chongqing Medical University, Department of Neurology<br>Del Giovane, Cinzia; University of Modena and Reggio Emilia, Clinical and Diagnostic Medicine and Public Health<br>Furukawa, Toshi; Kyoto University, Department of Health Promotion and Human Behavior, Kyoto University Graduate School of Medicine and School of Public Health<br>Barth, Jürgen; University Hospital and University of Zurich, Institute of Complementary and Integrative Medicine<br>Coghill, David; University of Melbourne, Departments of Paediatrics and Psychiatry<br>Leucht, Stefan; Technische Universität München, Department of Psychiatry and Psychotherapy<br>Yang, Lining; The First Affiliated Hospital of Chongqing Medical University, Department of Neurology<br>Ravindran, Arun ; University of Toronto, Department of Psychiatry<br>Xie, Peng; The First Affiliated Hospital of Chongqing Medical University, Department of Neurology; Chongqing Medical University, Institute of Neuroscience and the Collaborative Innovation Center for Brain Science |
| <b>Primary Subject Heading</b>: | Mental health                                                                                                                                                                                                                                                                                                                                                                                                                                                                                                                                                                                                                                                                                                                                                                                                                                                                                                                                                                                                                                                                                                                                                                                                                                                                                                                                                                                                                                                                                                                                                                                                                                                                                                                                                                                                             |
| Secondary Subject Heading:      | Mental health, Pharmacology and therapeutics, Evidence based practice                                                                                                                                                                                                                                                                                                                                                                                                                                                                                                                                                                                                                                                                                                                                                                                                                                                                                                                                                                                                                                                                                                                                                                                                                                                                                                                                                                                                                                                                                                                                                                                                                                                                                                                                                     |
| Keywords:                       | Depression & mood disorders < PSYCHIATRY, Child & adolescent psychiatry < PSYCHIATRY, antidepressant, psychotherapy, network meta-analysis, systematic review                                                                                                                                                                                                                                                                                                                                                                                                                                                                                                                                                                                                                                                                                                                                                                                                                                                                                                                                                                                                                                                                                                                                                                                                                                                                                                                                                                                                                                                                                                                                                                                                                                                             |

1  
2  
3  
4  
5  
6  
7  
8  
9  
10  
11  
12  
13  
14  
15  
16  
17  
18  
19  
20  
21  
22  
23  
24  
25  
26  
27  
28  
29  
30  
31  
32  
33  
34  
35  
36  
37  
38  
39  
40  
41  
42  
43  
44  
45  
46  
47  
48  
49  
50  
51  
52  
53  
54  
55  
56  
57  
58  
59  
60



SCHOLARONE™  
Manuscripts

For peer review only

1  
2  
3  
4 **Comparative efficacy and acceptability of antidepressants, psychological interventions, and their**  
5 **combination for depressive disorder in children and adolescents: protocol for a network meta-**  
6 **analysis**  
7  
8  
9

10  
11  
12 Xinyu Zhou,<sup>1</sup> Andrea Cipriani,<sup>2,3</sup> Yuqing Zhang,<sup>4</sup> Pim Cuijpers,<sup>5</sup> Sarah E. Hetrick,<sup>6</sup> John R. Weisz,<sup>7</sup> Juncai Pu,<sup>4</sup>  
13  
14 Cinzia Del Giovane,<sup>8</sup> Toshiaki A. Furukawa,<sup>9</sup> Jürgen Barth,<sup>10</sup> David Coghill,<sup>11</sup> Stefan Leucht,<sup>12</sup> Lining Yang,<sup>4</sup>  
15  
16 Arun V Ravindran,<sup>13</sup> Peng Xie<sup>4</sup>  
17  
18  
19  
20  
21

22  
23 <sup>1</sup> Department of Psychiatry, The First Affiliated Hospital of Chongqing Medical University, Chongqing,  
24  
25 China

26  
27 <sup>2</sup> Department of Psychiatry, University of Oxford, Warneford Hospital, Oxford, UK

28  
29 <sup>3</sup> Oxford Health NHS Foundation Trust, Warneford Hospital, Oxford, UK

30  
31 <sup>4</sup> Department of Neurology, The First Affiliated Hospital of Chongqing Medical University, Chongqing,  
32  
33 China;

34  
35 Institute of Neuroscience and the Collaborative Innovation Center for Brain Science, Chongqing Medical  
36  
37 University, Chongqing, China

38  
39 <sup>5</sup> Department of Clinical, Neuro and Developmental Psychology, Amsterdam Public Health research institute,  
40  
41 Vrije Universiteit Amsterdam, The Netherlands

42  
43 <sup>6</sup> Orygen, The National Centre of Excellence in Youth Mental Health, and the Centre of Youth Mental Health,  
44  
45 University of Melbourne, Melbourne, Australia

46  
47 <sup>7</sup> Department of Psychology, Harvard University, Cambridge, MA, USA

48  
49 <sup>8</sup> Department of Diagnostic, Clinical and Public Health Medicine, University of Modena and Reggio Emilia,  
50  
51 Modena, Italy

52  
53 <sup>9</sup> Department of Health Promotion and Human Behavior, Kyoto University Graduate School of Medicine and  
54  
55 School of Public Health, Kyoto, Japan

56  
57 <sup>10</sup> Institute for Complementary and Integrative Medicine, University Hospital and University of Zurich,  
58  
59  
60

1  
2  
3 Zurich, Switzerland

4  
5 <sup>11</sup> Departments of Paediatrics and Psychiatry, University of Melbourne, Melbourne, Australia

6  
7 <sup>12</sup> Department of Psychiatry and Psychotherapy, Technische Universität München, Munich, Germany

8  
9 <sup>13</sup> Department of Psychiatry, University of Toronto, Toronto, ON, Canada

10  
11  
12  
13 **Direct correspondence to:**

14 Prof. Peng Xie, Department of Neurology, The First Affiliated Hospital of Chongqing Medical University, 1

15 Youyi Road, Yuzhong District, Chongqing 400016, China; E-mail: [xiepeng973@126.com](mailto:xiepeng973@126.com)

16  
17  
18 Xinyu Zhou and Andrea Cipriani contributed equally to this work.

19  
20  
21  
22  
23 Keywords: depression, child, adolescent, antidepressant, psychotherapy, network meta-analysis, systematic  
24 review

25  
26 Word count: 3509.

## ABSTRACT

**Introduction:** Depressive disorder is common in children and adolescents, with important consequences and serious impairments in terms of personal and social functioning. While both pharmacological and psychological interventions have been shown to be effective, there is still uncertainty about the balance between these and what treatment strategy should be preferred in clinical practice. Therefore, we aim to compare and rank in a network meta-analysis (NMA) the commonly used psychological, pharmacological and combined interventions for depressive disorder in children and adolescents.

**Methods and analysis:** We will update the literature search of two previous NMAs for the identification of trials of antidepressant and psychotherapy alone for depressive disorder in children and adolescents. For identification of trials of combination interventions, seven databases (PubMed, EMBASE, CENTRAL (Cochrane Central Register of Controlled Trials), Web of Science, PsycINFO, CINAHL, LiLACS) will be searched from date of inception. We will also search ClinicalTrials.gov, the World Health Organization International Clinical Trials Registry Platform, and check relevant reports on the US FDA website for unpublished data. Building on our previous findings in the field, we will include any commonly prescribed oral antidepressants, and any manualised or structured psychotherapies, as well as their combinations. Randomised controlled trials assessing any active intervention against active comparator or pill placebo/psychological controls in acute treatment for depressive disorder in children and adolescents will be included. The primary outcomes will be efficacy (mean change in depressive symptoms), and acceptability of treatment (dropout rate due to any cause). The secondary outcomes will be remission rate, tolerability of treatment (dropouts for adverse events), as well as suicide-related outcomes (suicidal behavior or ideation). We will perform Bayesian NMAs for all relative outcome measures. Subgroup analyses and sensitivity analyses will be conducted to assess the robustness of the findings.

**Dissemination:** This NMA will provide the most up to date and clinically useful information about the comparative efficacy and acceptability of antidepressants, psychological intervention and their combination in the acute treatment of children and adolescents with depressive disorder. This is the newest network meta-



1  
2  
3  
4  
5  
6  
7  
8  
9  
10  
11  
12  
13  
14  
15  
16  
17  
18  
19  
20  
21  
22  
23  
24  
25  
26  
27  
28  
29  
30  
31  
32  
33  
34  
35  
36  
37  
38  
39  
40  
41  
42  
43  
44  
45  
46  
47  
48  
49  
50  
51  
52  
53  
54  
55  
56  
57  
58  
59  
60

analysis and therefore these results are very important in terms of evidence-based medicine. The results will be disseminated through peer-reviewed publication.

**Protocol registration:** PROSPERO CRD42015020841

For peer review only

### Strengths and limitations of this study

1  
2  
3  
4  
5  
6  
7  
8  
9  
10  
11  
12  
13  
14  
15  
16  
17  
18  
19  
20  
21  
22  
23  
24  
25  
26  
27  
28  
29  
30  
31  
32  
33  
34  
35  
36  
37  
38  
39  
40  
41  
42  
43  
44  
45  
46  
47  
48  
49  
50  
51  
52  
53  
54  
55  
56  
57  
58  
59  
60

1. The network meta-analysis can integrate direct evidence with indirect evidence from multiple treatment comparisons and multiple control approaches to estimate the interrelations across all treatments, which can guide treatment decisions and guideline development.

2. For the first time the efficacy, acceptability, tolerability, and suicide-related outcomes of pharmacological and psychological interventions, alone or in combination for depressive disorder in children and adolescents will be comprehensively assessed in a network meta-analysis.

3. We will employ validated local and global methods to evaluate consistency and we will explore whether treatment effects are robust in network subgroup analyses and sensitivity analyses. The quality of evidence for network estimates of the primary outcomes will be assessed with the GRADE framework, which characterises the quality of a body of evidence on the basis of the study limitations, imprecision, heterogeneity or inconsistency, indirectness, and publication bias.

## Background

Depressive disorder in children and adolescents is a major public health problem, affecting 1% to 2% of children (6–12 years old) and 2% to 5% of adolescents (13–18 years old), with a peak incidence around puberty.<sup>1,2</sup> The course of depressive disorder in children and adolescents is often characterised by protracted episodes, frequent recurrence, and comorbid psychiatric disorders.<sup>3</sup> Compared with adults, the identification and diagnosis of depressive disorder in children and adolescents may be more often missed by clinicians<sup>4</sup> due to undifferentiated signs and symptoms and atypical presentations. Thus, many such patients exhibit serious impairments in social functioning (e.g., poor school achievement; relational problems with family members and peers),<sup>5</sup> and are significantly increased risk for suicide behaviors and ideation.<sup>6</sup> For example, a report from the American Academy of Child and Adolescent Psychiatry (AACAP) suggested that depressive disorder is contributed to over 500,000 suicide attempts by children and adolescents a year.<sup>7</sup>

The past two decades have seen significant increases in the data for children and adolescents with depression and both pharmacological and psychological therapies have been effective. Among current psychological interventions, based on our previous findings, cognitive behavior therapy (CBT) and interpersonal psychotherapy (IPT) seem to be the best available psychotherapies for depression in children and adolescents.<sup>8,9</sup> Multiple pharmacological therapies have also been studied for the treatment of depressive disorder in children and adolescents.<sup>10–12</sup> The controversy about the use of antidepressants in this age group, due the potentially increased risk of suicidality, has not been fully resolved.<sup>13</sup> Recently, the findings of our previous studies showed most antidepressants do not seem to offer a clear benefit for children and adolescents, and fluoxetine is probably the best option to consider when a pharmacological treatment is indicated.<sup>10</sup>

Several clinical practice guidelines recommend that in children and adolescents, psychotherapy should be considered as the first-line intervention for the management of depressive disorder, while pharmacological treatments are often reserved for more severe illness or when psychotherapy does not work or is not available.<sup>14,15</sup> Nevertheless, the evidence-base for psychotherapy to be more effective and safer than antidepressants in the treatment of child and adolescent depressive disorder is not well established. A large,

1  
2  
3 non-industry funded trial reported superior efficacy for fluoxetine compared to CBT in adolescents with  
4 major depression.<sup>16</sup> Previous research supports the notion that psychotherapy has its own side-effects, such as  
5 dependency on the therapist, and leading to distress for the patients' family.<sup>17</sup> However, unlike with  
6 antidepressants, they are rarely measured systematically, making the comparison of safety and tolerability  
7 harder.<sup>18</sup> Moreover, data from the adult studies showed that combination antidepressants and psychotherapy  
8 is superior to either intervention alone.<sup>19,20</sup> Recently, a Cochrane conventional meta-analysis, on the basis of  
9 the very limited evidence, reported that the effectiveness of psychological interventions, antidepressant  
10 medication and a combination of these interventions for treating depressive disorders in children and  
11 adolescents cannot be established.<sup>21</sup>

22  
23 Network meta-analysis has the advantage that all interventions that have been tested in randomised  
24 controlled trials (RCTs) can be simultaneously compared, without requiring direct within-study treatment vs.  
25 treatment comparisons. Thus effects of the different treatments can be estimated relative to each other as well  
26 as to a common reference condition (e.g., pill placebo or psychological controls).<sup>22</sup> Network meta-analysis thus  
27 overcomes some of the limitations of traditional meta-analysis, in which conclusions are largely restricted to  
28 comparisons between treatments that have been directly compared in RCTs.<sup>23</sup> In our two previous network  
29 meta-analyses the comparative efficacy and acceptability of psychotherapies and antidepressants for  
30 depressive disorder in children and adolescents have been separately investigated<sup>8,10</sup> The aim of the current  
31 protocol is to synthesise all this evidence and provide clinicians with a reliable treatment algorithm of the  
32 commonly used psychological, and pharmacological interventions, as well as their combinations for the acute  
33 treatment of depressive disorder in children and adolescents.

## 48 **Methods**

### 49 *Criteria for included studies*

#### 50 **Types of studies**

51  
52 Any randomised controlled trials (RCTs), including the first phase of cross-over trials as well as cluster-  
53 randomised trials, will be included. Quasi-randomised trials (e.g., those allocating participants using alternate  
54  
55  
56  
57  
58  
59  
60

1  
2  
3 days of the week) will be excluded. For trials of antidepressants alone, only double-blind RCTs (patients and  
4  
5 raters blinded) will be included. As it is difficult to utilise a double-blind design for patients in trials of  
6  
7 psychotherapy alone or the combination of antidepressant and psychotherapy, we will only include trials in  
8  
9 which raters were blinded or participants were assessed by self-rating depression scales.  
10  
11

### 12 13 14 **Types of participants**

15  
16 We will include studies that enrolled participants aged less than 18 years of age when they are initially  
17  
18 enrolled in the studies, of both sexes with a diagnosis of depressive disorder, including of major depressive  
19  
20 disorder (MDD), dysthymia, and other specified types, based on standardised diagnostic criteria (e.g., the  
21  
22 Diagnostic and Statistical Manual of Mental Disorders or the International Classification of Diseases).<sup>24-29</sup>  
23  
24 While it is accepted that subclinical depression still has a significant impact on an individuals' social and  
25  
26 educational functioning, we will not include studies of this population. Similarly, studies where depressive  
27  
28 disorder was not formally diagnosed will also be excluded for the same rationale that its clinical  
29  
30 heterogeneity could violate the transitivity assumption in NMA (i.e. one can compare indirectly intervention  
31  
32 B and C via intervention A).<sup>30</sup> We will also exclude trials in which participants are described as having  
33  
34 psychotic depression or treatment-resistant depression, as their treatment response differs from patients  
35  
36 without treatment resistance or symptoms of psychosis. Trials focusing on child or adolescent bipolar  
37  
38 disorder will also be excluded, but not those involving patients with other comorbid psychiatric disorders as  
39  
40 diagnosed according to standardised criteria (e.g., anxiety disorder, or attention deficit hyperactivity  
41  
42 disorder). Where a study includes both adults and children/adolescents and the randomisation had been  
43  
44 stratified according this variable, the data will be included if data on the depressed youths can be separately  
45  
46 extracted from the manuscript, or can be obtained from the authors. Studies conducted in both inpatient and  
47  
48 outpatient settings will be included. RCTs recruiting participants with an overall sample size of fewer than  
49  
50 ten patients will be excluded.  
51  
52  
53  
54  
55  
56  
57

### 58 **Types of interventions**

59  
60

1  
2  
3  
4 For pharmacological interventions, we will include any commonly prescribed oral antidepressants (fixed  
5 or flexible doses). These will include tricyclic antidepressants (TCAs; amitriptyline, clomipramine,  
6 nortriptyline, desipramine, imipramine, etc.), selective serotonin reuptake inhibitors (SSRIs; escitalopram,  
7 fluoxetine, paroxetine, sertraline, etc.), and serotonin-norepinephrine reuptake inhibitors (SNRIs; venlafaxine,  
8 duloxetine), as well as novel agents mirtazapine and nefazodone. In terms of psychological interventions, we  
9 will include any manualised or structured psychotherapies, e.g., behavioral therapy, cognitive-behavioral  
10 therapy, cognitive therapy, family therapy, interpersonal therapy, play therapy, problem-solving therapy,  
11 psychodynamic therapy, and supportive therapy. Table 1 provides the detailed description of  
12 psychotherapies. Also, we will include the combination of both above-mentioned psychological interventions  
13 and pharmacological interventions. For the pharmacological interventions, the control condition is always a  
14 pill placebo, whilst the psychological control conditions are waiting-list (WL), treatment as usual (TAU),  
15 psychological placebo or attention placebo, or no-treatment (NT).  
16  
17  
18  
19  
20  
21  
22  
23  
24  
25  
26  
27  
28  
29  
30  
31

32 All RCTs comparing any active intervention (psychological interventions, pharmacological interventions,  
33 or their combinations) with either active comparators or control conditions for acute treatment of depressive  
34 disorder in children and adolescents will be included. The acute phase will be defined as from 4 to 16 week.  
35 We will exclude trials with treatment duration of less than 4 weeks, because the onset of benefit for most  
36 antidepressants often takes at least 4 weeks.<sup>31</sup> If a study present data for more than one time point within our  
37 pre-defined acute phase window or beyond 16 weeks, the 8-week (or the closest to 8-week) will be taken as  
38 the time. Trials comparing the same antidepressant at different therapeutic doses will be merged in the same  
39 node in the network analysis so long as they are within the dose range licensed by drug regulatory agencies.  
40 Also, trials comparing the same type of psychological interventions but at different numbers of therapeutic  
41 sessions, different delivery format (group, individual), different treatment medium (face-to-face, internet-  
42 based), and different treatment conditions (with or without family involvement) will be considered as the  
43 same node in the network analysis. We anticipate that any patient who meets all inclusion criteria, in  
44 principal, is equally likely to be randomised to any of the interventions in the synthesis comparator set.  
45  
46  
47  
48  
49  
50  
51  
52  
53  
54  
55  
56  
57  
58  
59  
60

1  
2  
3 We have generated an ideal network plot that is a fully connected network with all expected  
4 interventions (Figure 1).  
5  
6  
7  
8  
9

## 10 **Types of outcome measures**

### 11 *Primary outcomes*

- 12  
13  
14 (1) Efficacy (as a continuous outcome), measured by the overall mean change scores on depressive symptom  
15 scales (self- or assessor-rated), e.g., Children's Depression Rating Scale (CDRS-R)<sup>32</sup> and Hamilton  
16 Depression Rating Scale (HAMD)<sup>33</sup> from baseline to endpoint.  
17  
18  
19  
20  
21 (2) Acceptability of treatment, defined as the proportion of patients who drop out of the study by any cause  
22 during the delivery of the intervention.  
23  
24  
25  
26

### 27 *Secondary outcomes*

- 28  
29  
30 (1) Efficacy (as dichotomous outcome), measured by the total number of patients who achieved the criteria of  
31 remission, defined as being below the threshold in depression rating score (e.g., less than 28 for CDRS-  
32 R),<sup>34</sup> while these thresholds are different across trials.  
33  
34  
35  
36 (2) Tolerability of treatment, defined as the proportion of patients who discontinued treatment due to any  
37 adverse events during the delivery of the intervention.  
38  
39  
40  
41 (3) Suicide-related outcome, estimated by the reported cases of definitive suicidal behavior or suicidal  
42 ideation during the acute phase of treatment. The definition of suicide-related outcome is based on the  
43 Columbia Classification Algorithm of Suicide Assessment (C-CASA).<sup>35</sup> For the antidepressants trials,  
44 the data on suicidality mainly referred to the Columbia re-analysis data reported in the FDA report.<sup>36</sup> If  
45 trials are not included in this report, we will attempt to extract the data on suicide-related outcome  
46 from the Medicines and Healthcare products Regulatory Agency database or the pharmaceutical  
47 company website. For the psychological trials and the combination trials, we will mainly extract the  
48 data on suicidality from original text, and from related reviews.  
49  
50  
51  
52  
53  
54  
55  
56  
57  
58  
59  
60

1  
2  
3  
4 (4) Global functional improvement, estimated by overall change scores on global assessment of functioning  
5 scales, e.g., Children's Global Assessment Scale (CGAS)<sup>37</sup> and Global Assessment of Functioning Scale  
6 (GAF),<sup>38</sup> or quality of life scales, e.g., Quality of Life Enjoyment and Satisfaction Questionnaire (Q-LES-  
7 Q).<sup>39</sup> When data are reported on more than one measure, we will first chose data from the CGAS, then  
8 the GAF, and finally the Q-LES-Q and others.  
9  
10  
11  
12  
13

14  
15  
16  
17 Where depression symptoms are measured using more than one depression scale in a trial, we will  
18 extract data from the depressive scales on the basis of a hierarchy of rating scales. The hierarchy will be based  
19 on psychometric properties and appropriateness for use with children and adolescents and for consistency of  
20 use across trials (referred from the Zhou et al study<sup>40</sup>, Table 2). We will also establish a hierarchy of  
21 informants of depressive rating scales, with the clinician report first in the hierarchy, and then the child or  
22 adolescent self-report.  
23  
24  
25  
26  
27  
28  
29  
30  
31

### 32 **Data Sources and Search strategy**

33  
34 For the identification of trials of antidepressant and psychotherapy alone for depressive disorder in  
35 children and adolescents, we will update the literature search of our two previous network meta-analyses.<sup>8,10</sup>  
36 Other eligible trials of the combinations of antidepressant and psychotherapy will be identified by searching  
37 PubMed, EMBASE, CENTRAL (Cochrane Central Register of Controlled Trials), Web of Science, PsycINFO,  
38 ProQuest, CINAHL, LiLACS from date of inception with Medical Subject Headings (MeSH) and text words:  
39 (depress\* or dysthymi\* or mood disorder\* or affective disorder\*) and (adolesc\* or child\* or boy\* or girl\* or  
40 juvenil\* or minors or paediatric\* or pediatric\* or pubescen\* or school\* or student\* or teen\* or young or youth\*)  
41 and ("selective serotonin reuptake inhibitor\*" or SSRIs or "serotonin norepinephrine reuptake inhibitor\*" or  
42 SNRIs or citalopram or fluoxetine or paroxetine or sertraline or escitalopram or fluvoxamine or venlafaxine or  
43 duloxetine "noradrenergic and specific serotonergic antidepressants" or NaSSA or mirtazapine or TCA or  
44 tricyclic or amitriptyline or clomipramine or desipramine or imipramine or nortriptyline) and  
45 (psychotherapy\* or behavio\* or "family therap\*" or CBT or cognitive or interpersonal or IPT or "play therap\*" )  
46  
47  
48  
49  
50  
51  
52  
53  
54  
55  
56  
57  
58  
59  
60



1  
2  
3 or supportive or problem-solving or psychodynamic). We will also search ClinicalTrials.gov in USA and other  
4 international trial registers via the International Clinical Trials Registry Platform (ICTRP) in WHO. We will  
5 also check relevant reports on the US Food and Drug Administration (FDA) website, and hand-search key  
6 journals, conference proceedings, such as, *J Child Adolesc Psychopharmacol*, *J Am Acad Child Adolesc Psychiatry*,  
7 *Child Adolesc Psychiatry Ment Health*, *Psychopharmacol Bull*, *Arch Gen Psychiatry*, *Am J Psychiatry*, *Eur Psychiatry*,  
8 *Depress Anxiety*. There will be no restrictions on language, or publication year. Additional relevant studies  
9 will be obtained by scanning reference lists of trials identified in the initial searches and relevant review  
10 papers. We will also inquire at the relative pharmaceutical companies (e.g., GlaxoSmithKline, Lilly, Organon,  
11 Forest Pharmaceuticals, Bristol-Myers Squibb) and search their websites for unpublished data. All relevant  
12 experts and principal manufacturers will be contacted to supplement incomplete reports of the original  
13 papers or to provide new data for unpublished studies.  
14  
15  
16  
17  
18  
19  
20  
21  
22  
23  
24  
25  
26  
27  
28  
29

## 30 **Study selection and data extraction**

### 31 *Selection of trials*

32  
33  
34 Titles and abstracts identified from the search strategies will be independently examined by two  
35 reviewers (XZ and YZ). If both reviewers judge that the trial does not meet eligibility criteria, we will exclude  
36 it. Then, we will obtain the full-texts of all remaining articles and determine whether to include them  
37 according to inclusion criteria described above. We will calculate the inter-rater reliability of the two raters.  
38 Any disagreements will be resolved by a third review author (AC or PX) or by consultation with the authors  
39 of the articles. The reasons for exclusion of trials will be reported in the characteristics of excluded studies list.  
40  
41  
42  
43  
44  
45  
46  
47  
48

### 49 *Data extraction*

50  
51 Two independent reviewers (XZ and YZ) will extract the data from each included trial using  
52 standardised data extraction forms, including study characteristics (e.g., first listed author, publication year,  
53 title, publication type, publication journal, country, and sponsor), patient characteristics (e.g., diagnostic  
54 criteria, comorbidities, the age of patients, patient setting, the number of patients, the gender of patients, and  
55  
56  
57  
58  
59  
60

1  
2  
3 severity of depression at baseline), intervention details (e.g., the type of intervention, the treatment duration,  
4 the dose of antidepressant agent, the length and number of sessions of psychotherapy, treatment delivery and  
5 treatment medium of psychotherapy) and outcome measures (primary outcomes and secondary outcomes).  
6  
7 We will assess and report the reliability of the reviewers' data extraction on each coded variable. Any  
8  
9 disagreements will be resolved by a third review author (AC or PX). Where necessary, the authors of the  
10  
11 studies will be contacted for further information.  
12  
13  
14  
15  
16  
17  
18

### 19 *Risk of bias assessment*

20  
21 We will assess risk of bias as "low risk", "unclear risk", or "high risk", in accordance with the Cochrane  
22  
23 Collaboration's Risk of bias tool as described in the Cochrane Hand book for Systematic Reviews of  
24  
25 Interventions.<sup>41</sup> The following items will be assessed: sequence generation, allocation concealment, blinding of  
26  
27 participants and personnel, blinding of outcome assessors, incomplete outcome data, selective outcome  
28  
29 reporting, and other sources of bias (e.g., sponsorship bias/researcher allegiance bias). Two independent  
30  
31 review authors (XZ and YZ) will assess the risk of bias in selected studies. Degree of agreement between the  
32  
33 two independent raters will be reported. Any disagreements will be resolved by a third review author (AC or  
34  
35 PX). Where necessary, the authors of the studies will be contacted for further information. Studies will be  
36  
37 classified as having high risk of bias if two or more domains were rated as high risk of bias; low if five or  
38  
39 more were rated as low risk of bias and none was rated as high risk of bias, and all other cases will be  
40  
41 assumed to pertain to moderate risk.  
42  
43  
44  
45  
46

### 47 **Statistical analysis**

48  
49 Network meta-analysis combines direct and indirect evidence for all relative treatment effects and  
50  
51 provides estimates with maximum power.<sup>23</sup> First, we will perform pairwise meta-analyses of direct evidence  
52  
53 using the random-effects model with STATA version 14.0. Second, we will also perform a random-effects  
54  
55 network meta-analysis (NMA) within a Bayesian framework using Markov chain Monte Carlo in WinBUGS  
56  
57 version 1.4.3. Where different measures are used to assess the same outcome, continuous outcomes data will  
58  
59  
60

1  
2  
3 be pooled with standardised mean difference (SMD), and dichotomous outcomes will be analysed by  
4  
5 calculating the odds ratio (OR). In the presence of minimally informative priors, Credible Intervals (CrIs) can  
6  
7 be interpreted similarly to confidence intervals (CIs).  
8  
9

10 Missing dichotomous outcome data will be managed according to the intention to treat (ITT) principle,  
11  
12 and all the dropouts after randomisation will be considered to be non-responders. Missing continuous  
13  
14 outcome data will be analysed using the completer data. When p-values, t-values, confidence intervals or  
15  
16 standard errors are reported in articles, SD will be calculated from their values.<sup>42</sup> Where SDs are missing,  
17  
18 attempts will be made to obtain these data through contacting trial authors. When this fails, they will be  
19  
20 borrowed from the other trials in the network or from other published reports.<sup>42</sup>  
21  
22

23 In the analysis of network meta-analysis, the pooled estimates will be obtained using the Markov Chains  
24  
25 Monte Carlo method. Two Markov chains will be run simultaneously with different arbitrarily chosen initial  
26  
27 values and non-informative priors will be used for the parameters. To ensure convergence, trace plots and the  
28  
29 Brooks-Gelman-Rubin statistic will be assessed.<sup>43</sup> We will also estimate the ranking probabilities for all  
30  
31 treatments of being at each possible rank for each intervention. Then, we will obtain a treatment hierarchy  
32  
33 using the surface under the cumulative ranking curve (SUCRA) and mean ranks. SUCRA can also be  
34  
35 interpreted as the percentage of efficacy/safety of a treatment that would be ranked first without  
36  
37 uncertainty.<sup>44</sup>  
38  
39

#### 40 41 42 *Measures for transitivity assumption*

43  
44 We will assess whether the included interventions are similar when they are evaluated in RCTs with  
45  
46 different designs; and whether the distributions of clinical and methodological variables that can act as effect  
47  
48 modifiers across treatment comparison are balanced across comparisons. The clinical features, which have  
49  
50 been demonstrated to date to moderate efficacy of antidepressants and psychotherapy in children and  
51  
52 adolescents include bipolarity,<sup>45</sup> psychotic features,<sup>46</sup> subthreshold depression.<sup>47</sup> We have assured transitivity  
53  
54 in our network with regard to these variables by limiting our samples to participants with non-psychotic  
55  
56 unipolar depressive disorders. Other clinical or methodological variables that may influence our primary  
57  
58  
59  
60

1  
2  
3 outcomes of treatment efficacy or acceptability include: age, sex, depressive severity at baseline, and the  
4  
5 treatment duration.  
6

### 7 *Measures for heterogeneity*

8  
9  
10 In standard pairwise meta-analyses we will estimate a different heterogeneity variance for each pairwise  
11  
12 comparisons; in network meta-analysis we will assume a common estimate for the heterogeneity variance  
13  
14 across the different comparisons. We will assess statistically the presence of heterogeneity within each  
15  
16 pairwise comparison using the I-squared statistic<sup>48</sup> and its 95% confidence interval that measures the  
17  
18 percentage of variability that cannot be attributed to random error. The assessment for the presence of  
19  
20 statistical heterogeneity in the entire network will be based on the magnitude of the heterogeneity variance  
21  
22 parameter ( $\tau^2$ ) estimated from the NMA models. We will also estimate a total I-squared value and predictive  
23  
24 intervals for heterogeneity in the network.<sup>49</sup>  
25  
26  
27  
28

### 29 *Measures for inconsistency*

30  
31  
32 NMA assumes that there is consistency in the network (i.e. direct and indirect evidence are in  
33  
34 agreement). However, the assumption of consistency can be violated either in the entire network or in certain  
35  
36 parts (i.e. loops of evidence) of the network.<sup>50</sup> Therefore, consistency needs to be checked. We will evaluate  
37  
38 the presence of local inconsistency and global inconsistency in STATA version 14.0 and will be duplicated in  
39  
40 R software.<sup>51</sup>  
41  
42  
43  
44

### 45 *Measures for publication bias*

46  
47 We will use the contour-enhanced funnel plot and Egger's test to assess risk of publication bias within  
48  
49 each pairwise comparison.<sup>52</sup> We will also use the comparison-adjusted funnel plots of all trials with placebo  
50  
51 controls or inactive controls to investigate whether results in imprecise trials differ from those in more precise  
52  
53 trials in network meta-analysis.<sup>53</sup>  
54  
55  
56  
57

### 58 *Subgroup analyses and sensitivity analyses*

1  
2  
3  
4 Where possible, we will conduct the network meta-regression meta-analyses of data on primary  
5  
6 outcomes for the: (i) age of participants (children vs. adolescents); (ii) sex ratio; (iii) the severity of depressive  
7  
8 symptoms at baseline; (iv) the treatment duration; (v) severity of depressive symptom at baseline. If possible,  
9  
10 we will do some extra subgroup analyses according to the results of heterogeneity and inconsistency. In the  
11  
12 sensitivity analysis, trials where missing data have been imputed will be excluded, trials where high risk of  
13  
14 bias rating have been assessed, and trials where only included patients comorbidity with other psychiatric  
15  
16 disorders will be excluded. And, we will not only test whether the results change but also if transitivity  
17  
18 (consistency/model fit) is affected. We will also examine some variables (e.g., sample size of trials<sup>54</sup>), as  
19  
20 continuous measure in meta-regression analyses.  
21

#### 22 23 24 25 *GRADE quality assessment*

26  
27 We will also assess the quality of evidence contributing to primary outcomes with the GRADE  
28  
29 framework, which characterises the quality of a body of evidence on the basis of the study limitations,  
30  
31 imprecision, heterogeneity or inconsistency, indirectness, and publication bias.<sup>55</sup> The starting point for  
32  
33 confidence in each network estimate is high, but will be downgraded according to the assessments of these  
34  
35 five aspects.  
36  
37

#### 38 39 40 41 *Ethics and dissemination*

42  
43  
44 This network meta-analysis does not need ethical approval, as data used here are based on aggregated  
45  
46 data in the public domain. Findings from the analysis will provide an overview and information on the  
47  
48 relative efficacy and acceptability of antidepressant medications, psychological therapies, and their  
49  
50 combination for depressive disorder in children and adolescents. It is suggested that the findings will have  
51  
52 significant implications for clinical practice and further research.  
53  
54  
55  
56  
57  
58  
59  
60

1  
2  
3  
4 **Contributors** PX, AC, and XZ conceived the study and drafted the protocol. PX, AC and XZ wrote the first  
5  
6  
7 draft of the manuscript. PC, SEH, JRW, CDG, TAF, JB, DC, SL, AVR assisted in protocol design and revision.  
8  
9  
10 XZ, YZ, and LY participated in the search strategy development. CDG, and JP participated in the design of  
11  
12 data synthesis and analysis. All the authors have approved the publication of the protocol.

13  
14  
15 **Funding** This work is supported by the National Basic Research Program of China (973 Program) (Grant No.  
16  
17  
18 2009CB918300). The funders had no role in the protocol design; the writing of the protocol; or the decision to  
19  
20  
21 submit the protocol for publication.

22  
23  
24 **Competing interests** AC reports personal fees from Accord Healthcare as an expert witness for a patent issue  
25  
26  
27 about quetiapine extended release. SEH is an Editor of the Cochrane Common Mental Disorders Group, an  
28  
29  
30 author of the Cochrane systematic review of newer generation antidepressants for depression in children and  
31  
32  
33 adolescents, and an author (senior) on the Cochrane review of psychological, pharmacological and their  
34  
35  
36 combination for child/adoles depression. DC reports grants and personal fees from Shire; personal fees from  
37  
38  
39 Eli Lilly, Janssen Cilag, Novartis, Sandoz, Oxford University Press; and grants from European Union FP7,  
40  
41  
42 outside of the submitted work. Eli Lilly has provided drugs for a clinical trial led by SL as the principal  
43  
44  
45 investigator. AVR reports personal fees from Bristol Myers Squibb, Pfizer, Sunovion; grants from Pfizer,  
46  
47  
48 Grand Challenges Canada, Canadian Institute of Health Research, and AstraZeneca, outside of the submitted  
49  
50  
51 work. TAF has received lecture fees from Eli Lilly, Janssen, Meiji, MSD, Otsuka, Pfizer and Tanabe-Mitsubishi,  
52  
53  
54 and consultancy fees from Sekisui Chemicals and Takeda Science Foundation. He has received royalties from  
55  
56  
57  
58  
59  
60

1  
2  
3  
4 Igaku-Shoin and Nihon Bunka Kagaku-sha publishers. He has received research support from Mochida and  
5  
6  
7 Tanabe-Mitsubishi. XZ, YZ, PC, JRW, JP, CDG, TAF, JB, and LY declare no competing interests.  
8

9  
10 **Acknowledgments** Andrea Cipriani is supported by the National Institute for Health Research Oxford  
11  
12 Cognitive Health Clinical Research Facility. We thank Philip Hazell from Discipline of Psychiatry, Sydney  
13  
14 Medical School, Concord West, NSW, Australia, David Cohen from Department of Child and Adolescent  
15  
16 Psychiatry, Hôpital Pitié-Salpêtrière, Institut des Systèmes Intelligents et Robotiques, Université Pierre et  
17  
18 Marie Curie, Paris, France, and Craig Whittington from Doctor Evidence, Santa Monica, CA, USA, for their  
19  
20  
21  
22  
23  
24 valuable advice.  
25

26  
27 **Provenance and peer review** Not commissioned; externally peer-reviewed.  
28

29  
30 **Open Access** This is an Open Access article distributed in accordance with the Creative Commons  
31  
32 Attribution- Non Commercial (CC BY-NC 4.0) license, which permits others to distribute, remix, adapt, build  
33  
34 upon this work non-commercially, and license their derivative works on different terms, provided the  
35  
36 original work is properly cited and the use is non-commercial. See: See:  
37  
38  
39  
40  
41 <http://creativecommons.org/licenses/by-nc/4.0/>  
42  
43  
44  
45  
46  
47  
48  
49  
50  
51  
52  
53  
54  
55  
56  
57  
58  
59  
60

## References

1. Costello EJ, Mustillo S, Erkanli A, *et al.* Prevalence and development of psychiatric disorders in childhood and adolescence. *Arch Gen Psychiatry* 2003;60:837-44.
2. Kessler RC, Berglund P, Demler O, *et al.* Lifetime prevalence and age-of-onset distributions of DSM-IV disorders in the National Comorbidity Survey Replication. *Arch Gen Psychiatry* 2005;62:593-602.
3. Thapar A, Collishaw S, Pine DS, *et al.* Depression in adolescence. *Lancet* 2012;379:1056-67.
4. Hazell P. Depression in children. *BMJ* 2002;325:229-30.
5. Puig-Antich J, Lukens E, Davies M, *et al.* Psychosocial functioning in prepubertal major depressive disorders. II. Interpersonal relationships after sustained recovery from affective episode. *Arch Gen Psychiatry* 1985;42:511-7.
6. Gould MS, King R, Greenwald S, *et al.* Psychopathology associated with suicidal ideation and attempts among children and adolescents. *J Am Acad Child Adolesc Psychiatry* 1998;37:915-23.
7. Centers for Disease Control and Prevention (CDC). Suicide trends among youths and young adults aged 10-24 years-United States, 1990-2004. *Morb Mortal Wkly Rep* 2007;56:905-8.
8. Zhou X, Hetrick SE, Cuijpers P, *et al.* Comparative efficacy and acceptability of psychotherapies for depression in children and adolescents: a systematic review and network meta-analysis. *World Psychiatry* 2015;14:207-22.9.
9. Weisz JR, McCarty CA, Valeri SM. Effects of psychotherapy for depression in children and adolescents: a meta-analysis. *Psychol Bull* 2006;132:132-49.
10. Cipriani A, Zhou X, Del Giovane C, *et al.* Comparative efficacy and tolerability of antidepressants for major depressive disorder in children and adolescents: a network meta-analysis. *Lancet* 2016;388:881-90.
11. Hetrick SE, McKenzie JE, Cox GR, *et al.* Newer generation antidepressants for depressive disorders in children and adolescents. *Cochrane Database Syst Rev* 2012;11:CD004851.
12. Hazell P, Mirzaie M. Tricyclic drugs for depression in children and adolescents. *Cochrane Database Syst Rev* 2013;6:CD002317.



- 1  
2  
3  
4 13. U.S. Food and Drug Administration (FDA). Suicidality in children and adolescents being treated with  
5 antidepressant medications.  
6  
7  
8 [www.fda.gov/drugs/drugsafety/postmarketdrugsafetyinformationforpatientsandproviders/ucm161679.](http://www.fda.gov/drugs/drugsafety/postmarketdrugsafetyinformationforpatientsandproviders/ucm161679.htm)  
9  
10 [htm](http://www.fda.gov/drugs/drugsafety/postmarketdrugsafetyinformationforpatientsandproviders/ucm161679.htm) (accessed 20 Jan 2017).  
11
- 12 14. National Collaborating Centre for Mental Health (UK). Depression in Children and Young People:  
13 Identification and management in primary, community and secondary care. British Psychological Society,  
14 2005; Available from [www.ncbi.nlm.nih.gov/books/NBK56425/](http://www.ncbi.nlm.nih.gov/books/NBK56425/). (accessed 20 Jan 2017).  
15  
16  
17
- 18 15. McDermott B, Baigent M, Chanen A, *et al*. Clinical practice guidelines: Depression in adolescents and  
19 young adults. Melbourne: beyondblue: the national depression initiative,  
20 2011.<https://www.bspg.com.au/dam/bsg/product?client=BEYONDBLUE&prodid=BL/0890&type=file>  
21  
22 (accessed 20 Jan 2017).  
23  
24  
25  
26
- 27 16. March J, Silva S, Petrycki S, *et al*. Fluoxetine, cognitive-behavioral therapy, and their combination for  
28 adolescents with depression: Treatment for Adolescents With Depression Study (TADS) randomized  
29 controlled trial. *JAMA* 2004; 292: 807-20.  
30  
31  
32  
33
- 34 17. Nutt DJ, Sharpe M. Uncritical positive regard? Issues in the efficacy and safety of psychotherapy. *J*  
35 *Psychopharmacol* 2008; 22: 3-6.  
36  
37
- 38 18. Linden M, Schermuly-Haupt ML. Definition, assessment and rate of psychotherapy side effects. *World*  
39 *Psychiatry* 2014; 13: 306-9.  
40  
41  
42
- 43 19. Pampallona S, Bollini P, Tibaldi G, *et al*. Combined pharmacotherapy and psychological treatment for  
44 depression: a systematic review. *Arch Gen Psychiatry*. 2004;61:714-9.  
45  
46
- 47 20. de Maat SM, Dekker J, Schoevers RA, *et al*. Relative efficacy of psychotherapy and combined therapy in the  
48 treatment of depression: a meta-analysis. *Eur Psychiatry* 2007;22:1-8.  
49  
50
- 51 21. Cox GR, Callahan P, Churchill R, *et al*. Psychological therapies versus antidepressant medication, alone  
52 and in combination for depression in children and adolescents. *Cochrane Database Syst Rev*  
53 2014;11:CD008324.  
54  
55  
56  
57  
58  
59  
60

- 1  
2  
3  
4 22. Mavridis D, Giannatsi M, Cipriani A, *et al*. A primer on network meta-analysis with emphasis on mental  
5 health. *Evid Based Ment Health* 2015;18:40-6.  
6  
7  
8 23. Lu G, Ades AE. Combination of direct and indirect evidence in mixed treatment comparisons. *Stat Med*  
9 2004;23:3105-24.  
10  
11  
12 24. American Psychiatric Association. *Diagnostic and Statistical Manual of Mental Disorders (DSM-III)*. 3rd  
13 Edition. Washington, DC: American Psychiatric Association, 1980.  
14  
15  
16 25. American Psychiatric Association. *Diagnostic and Statistical Manual of Mental Disorders (DSM-III-R)*. 3rd  
17 Edition. Washington, DC: American Psychiatric Association, 1987.  
18  
19  
20 26. American Psychiatric Association. *Diagnostic and Statistical Manual of Mental Disorders (DSM-IV)*. 4th  
21 Edition. Washington, DC: American Psychiatric Association, 1994.  
22  
23  
24 27. World Health Organization (WHO). *The ninth revision of the international classification of diseases and related*  
25 *health problems (ICD-9)*. Geneva: World Health Organization, 1978.  
26  
27  
28 28. World Health Organization (WHO). *The tenth revision of the international classification of diseases and related*  
29 *health problems (ICD-10)*. Geneva: World Health Organization, 1992.  
30  
31  
32 29. Kaufman J, Birmaher B, Brent D, *et al*. Schedule for affective disorders and schizophrenia for school-age  
33 children-present and lifetime version (K-SADS-PL): initial reliability and validity data. *J Am Acad Child*  
34 *Adolesc Psychiatry* 1997;36:980-8.  
35  
36  
37 30. Salanti G. Indirect and mixed-treatment comparison, network, or multiple-treatments meta-analysis: many  
38 names, many benefits, many concerns for the next generation evidence synthesis tool. *Res Synth Meth* 2012;  
39 3:80-97.  
40  
41  
42 31. Birmaher B, Brent D, AACAP Work Group on Quality Issues, *et al*. Practice parameter for the assessment  
43 and treatment of children and adolescents with depressive disorders. *J Am Acad Child Adolesc Psychiatry*  
44 2007;46:1503-26.  
45  
46  
47 32. Poznanski EO, Mokros HB. *Children's depression rating scale, revised (CDRS-R): manual*. Los Angeles:  
48 Western Psychological Services, 1996.  
49  
50  
51 33. Hamilton M. A rating scale for depression. *J Neurol Neurosurg Psychiatry* 1960;23:56-62.  
52  
53  
54  
55  
56  
57  
58  
59  
60

- 1  
2  
3  
4 34. Riedel M, Moller HJ, Obermeier M, *et al.* Response and remission criteria in major depression – a  
5 validation of current practice. *J Psychiatr Res* 2010;44:1063-8.  
6  
7  
8 35. Posner K, Oquendo MA, Gould M, *et al.* Columbia Classification Algorithm of Suicide Assessment (C-  
9 CASA): classification of suicidal events in the FDA’s pediatric suicidal risk analysis of antidepressants. *Am*  
10 *J Psychiatry* 2007;164:1035-43.  
11  
12  
13  
14 36. Hammad TA. Review and evaluation of clinical data. Washington, DC, US Food and Drug  
15 Administration. [http://www.fda.gov/ohrms/dockets/ac/04/briefing/2004-4065b1-10-tab08-hammads-](http://www.fda.gov/ohrms/dockets/ac/04/briefing/2004-4065b1-10-tab08-hammads-review.pdf)  
16 [review.pdf](http://www.fda.gov/ohrms/dockets/ac/04/briefing/2004-4065b1-10-tab08-hammads-review.pdf) (accessed 20 Jan 2017).  
17  
18  
19  
20  
21 37. Shaffer D, Gould MS, Brasic J, *et al.* A children’s global assessment scale (CGAS). *Arch Gen Psychiatry*  
22 1983;40:1228-31.  
23  
24  
25  
26 38. Endicott J, Spitzer RL, Fleiss JL, *et al.* The Global Assessment Scale: a procedure for measuring overall  
27 severity of psychiatric disturbance. *Arch Gen Psychiatry* 1976;33:766-71.  
28  
29  
30 39. Endicott J, Nee J, Harrison W, *et al.* Quality of Life Enjoyment and Satisfaction Questionnaire: a new  
31 measure. *Psychopharmacol Bull* 1993;29:321-6.  
32  
33  
34 40. Zhou X, Qin B, Whittington C, *et al.* Comparative efficacy and tolerability of first-generation and newer-  
35 generation antidepressant medications for depressive disorders in children and adolescents: study  
36 protocol for a systematic review and network meta-analysis. *BMJ Open* 2015;5:e007768.  
37  
38  
39  
40 41. Higgins JPT, Green S. *Cochrane handbook for systematic reviews of interventions version 5.1.0* [updated March  
41 2011]. The Cochrane Collaboration, 2011. <http://handbook.cochrane.org/> (accessed 20 Jan 2017).  
42  
43  
44 42. Furukawa TA, Barbui C, Cipriani A, *et al.* Imputing missing standard deviations in meta-analyses can  
45 provide accurate results. *J Clin Epidemiol* 2006;59:7-10.  
46  
47  
48  
49 43. Brooks SP, Gelman A. Alternative methods for monitoring convergence of iterative simulations. *J Comput*  
50 *Graph Stat* 1998;7:434-45.  
51  
52  
53  
54 44. Salanti G, Ades AE, Ioannidis JP. Graphical methods and numerical summaries for presenting results from  
55 multiple-treatment meta-analysis: an overview and tutorial. *J Clin Epidemiol* 2011; 64:163-71.  
56  
57  
58  
59  
60

- 1  
2  
3  
4 45. Liu HY, Potter MP, Woodworth KY, *et al.* Pharmacologic treatments for pediatric bipolar disorder: a  
5  
6 review and meta-analysis. *J Am Acad Child Adolesc Psychiatry* 2011;50:749-62.  
7  
8 46. Sullivan SA, Lewis G, Gunnell D, *et al.* The longitudinal association between psychotic experiences,  
9  
10 depression and suicidal behaviour in a population sample of adolescents. *Soc Psychiatry Psychiatr Epidemiol*  
11  
12 2015;50:1809-17.  
13  
14 47. Wesselhoeft R, Sørensen MJ, Heiervang ER, *et al.* Subthreshold depression in children and adolescents - a  
15  
16 systematic review. *J Affect Disord* 2013; 151:7-22.  
17  
18 48. Higgins JP, Thompson SG, Deeks JJ, *et al.* Measuring inconsistency in meta-analyses. *BMJ* 2003;327:557-60.  
19  
20 49. Jackson D, Barrett JK, Rice S, *et al.* A design-by-treatment interaction model for network meta-analysis  
21  
22 with random inconsistency effects. *Stat Med* 2014; 33:3639-54.  
23  
24 50. Dias S, Welton NJ, Sutton AJ, *et al.* Evidence synthesis for decision making 4: inconsistency in networks of  
25  
26 evidence based on randomized controlled trials. *Med Decis Making* 2013; 33:641-56.  
27  
28 51. Higgins JP, Jackson D, Barrett JK, *et al.* Consistency and inconsistency in network meta-analysis: concepts  
29  
30 and models for multi-arm studies. *Res Synth Methods* 2012; 3:98-110.  
31  
32 52. Peters JL, Sutton AJ, Jones DR, *et al.* Contour-enhanced meta-analysis funnel plots help distinguish  
33  
34 publication bias from other causes of asymmetry. *J Clin Epidemiol* 2008;61:991-6.  
35  
36 53. Salanti G, Ades AE, Ioannidis JP. Graphical methods and numerical summaries for presenting results from  
37  
38 multiple-treatment met-aanalysis: an overview and tutorial. *J Clin Epidemiol* 2011; 64: 163-71.  
39  
40 54. Chaimani A, Salanti G. Using network meta-analysis to evaluate the existence of small-study effects in a  
41  
42 network of interventions. *Res Synth Methods* 2012;3:161-76.  
43  
44 55. Salanti G, Del Giovane C, Chaimani A, *et al.* Evaluating the quality of evidence from a network meta-  
45  
46 analysis. *PLoS One* 2014;9:e99682.  
47  
48  
49  
50  
51  
52  
53  
54  
55  
56  
57  
58  
59  
60

## TABLES

Table 1 Description of Psychotherapeutic interventions and control conditions

| Interventions                          | Abbreviation | Description                                                                                                                                                                                                                                                                                                                                                                                                                               |
|----------------------------------------|--------------|-------------------------------------------------------------------------------------------------------------------------------------------------------------------------------------------------------------------------------------------------------------------------------------------------------------------------------------------------------------------------------------------------------------------------------------------|
| <i>Psychotherapeutic Intervention:</i> |              |                                                                                                                                                                                                                                                                                                                                                                                                                                           |
| Behavioral therapy                     | BT           | BT uses some kind of behavioral training and psychoeducation. BT programs provide parents and youths information about MDD and interventions; teach youths to monitor their mood, thoughts and behaviors; proposed pleasant activity scheduling and behavioral activation.                                                                                                                                                                |
| Cognitive-behavioral therapy           | CBT          | CBT is a combination of BT and CT. Additional CBT skill-building techniques are used in many programs by teaching relaxation techniques to cope with environmental stressors, providing social skills and resolution training, and teaching general problem-solving.                                                                                                                                                                      |
| Cognitive therapy                      | CT           | CT uses some kind of cognitive restructuring training. CT programs ask youths to examine their automatic thoughts and core schemas and to assess the accuracy and affective consequences of their views. They aim to teach youths to engage in "rational" thinking about themselves, the world and their possibilities for the future.                                                                                                    |
| Family therapy                         | FT           | FT works with families to nurture change and development. FT tends to view change in terms of the systems of interaction between family members. In the case of youth with MDD, FT aims at helping the family to answer the child's needs for completing age-appropriate developmental tasks to relieve depression.                                                                                                                       |
| Interpersonal therapy                  | IPT          | IPT aim at educating patients as to how their depression and the quality of interpersonal relationships affect one another and at addressing interpersonal problems that may be contributing to the depression (e.g. grief, disputes, role transitions, social deficits). Compared to its adult version, IPT in youths is shorter, involves parents, and adds a liaison role for the therapist between schools and families.              |
| Play therapy                           | PT           | PT used techniques to engage participants in recreational activities to help them cope with their problems and fears.                                                                                                                                                                                                                                                                                                                     |
| Problem-solving therapy                | PST          | PST focus on the problems participants are currently facing and on helping them find solutions to those problems.                                                                                                                                                                                                                                                                                                                         |
| Psychodynamic therapy                  | DYN          | DYN proposed patients to help understand the origin and nature of long standing problems by investigating both conscious and non-conscious thoughts and emotional feelings. DYN uses free associations and interpretation of dreams (or drawing in children), and addresses how personal history and experience may alter the patient/therapist transference. In youth MDD, a particular interest is given to psychological trauma, early |

parent/child relationships, narcissistic organization and experiences of loss.

Supportive therapy      SUP  
 SUP is an unstructured therapy without specific psychological techniques that it helped people to ventilate their experiences and emotions and offering empathy. These therapies are commonly described in the literature as either counseling or supportive therapy.

***Control conditions:***

No-treatment      NT  
 NT is a control condition in which the participants receive no active treatment during the study and in which they do not expect to receive such after the study is over.

Psychological placebo      PBO  
 PBO is a control condition that was regarded as inactive by the researchers but was to be the participants.

Treatment-as-usual      TAU  
 TAU is not considered to be structured psychotherapy but may have some treatment effects.

Waitlist      WL  
 WL is a control condition in which the participants receive no active treatment during the study but are forewarned that they can receive one after the study period is over.

---

Table 2 Hierarchy of depression symptom severity measurement scales

| Hierarchy | Depression symptom severity measurement scales                              | Abbreviation |
|-----------|-----------------------------------------------------------------------------|--------------|
| 1         | Children's Depression Rating Scale                                          | CDRS         |
| 2         | Hamilton Depression Rating Scale                                            | HAMD         |
| 3         | Montgomery Asberg Depression Rating Scale                                   | MADRS        |
| 4         | Beck Depression Inventory                                                   | BDI          |
| 5         | Children's Depression Inventory                                             | CDI          |
| 6         | Schedule for Affective Disorders and Schizophrenia for School Aged Children | K-SADS       |
| 7         | Mood and Feeling Questionnaire                                              | MFQ          |
| 8         | Reynolds Adolescent Depression Scale                                        | RADS         |
| 9         | Bellevue Index of Depression                                                | BID          |
| 10        | Child Depression Scale                                                      | CDS          |
| 11        | Centre for Epidemiologic Studies Depression Scale                           | CESD         |
| 12        | Child Assessment Schedule                                                   | CAS          |
| 13        | Child Behavior Checklist-Depression                                         | CBCL-D       |

1  
2  
3  
4  
5  
6  
7  
8  
9  
10  
11  
12  
13  
14  
15  
16  
17  
18  
19  
20  
21  
22  
23  
24  
25  
26  
27  
28  
29  
30  
31  
32  
33  
34  
35  
36  
37  
38  
39  
40  
41  
42  
43  
44  
45  
46  
47  
48  
49  
50  
51  
52  
53  
54  
55  
56  
57  
58  
59  
60

Figure 1. Possible interventions eligible for the ideal network plot

For peer review only



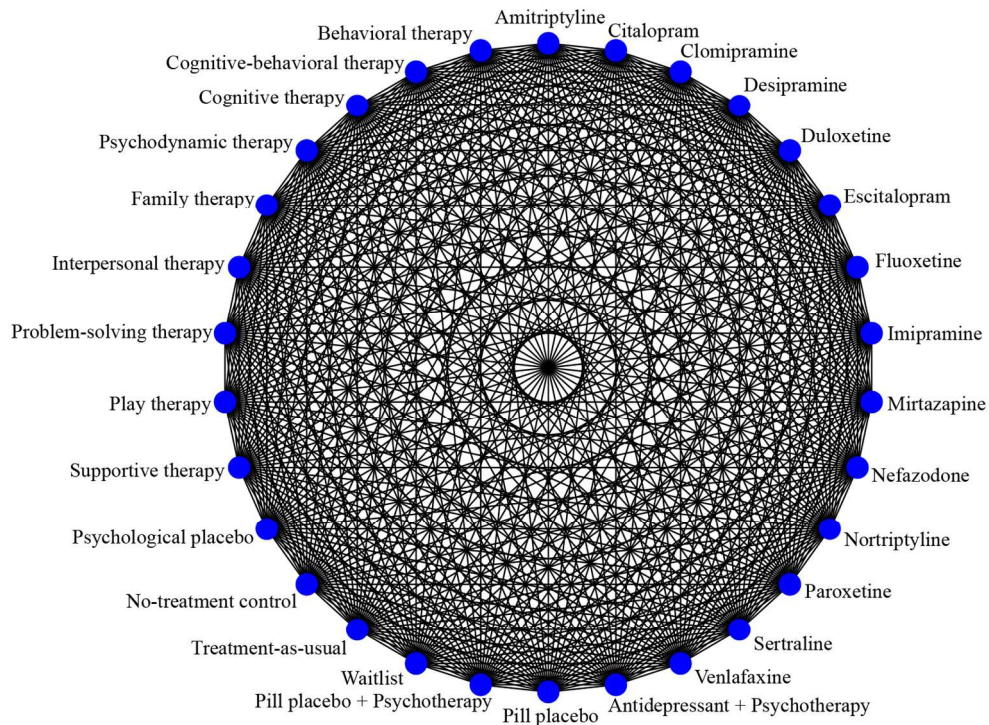

Figure 1. Possible interventions eligible for the ideal network plot

139x102mm (300 x 300 DPI)

Review only

1  
2  
3  
4  
5  
6  
7  
8  
9  
10  
11  
12  
13  
14  
15  
16  
17  
18  
19  
20  
21  
22  
23  
24  
25  
26  
27  
28  
29  
30  
31  
32  
33  
34  
35  
36  
37  
38  
39  
40  
41  
42  
43  
44  
45  
46  
47  
48  
49  
50  
51  
52  
53  
54  
55  
56  
57  
58  
59  
60

**PRISMA-P (Preferred Reporting Items for Systematic review and Meta-Analysis Protocols) 2015 checklist: recommended items to address in a systematic review protocol\***

| Section and topic                 | Item No | Checklist item                                                                                                                                                                                                                                                                                                                                                                                                                                                                                                                                                                                                                                                                                                                                                                                                                                                                                                                                                                                                                                                                                                                                                                                                                                                                                                                                                                                                                                                                                                                                                                                                                                                                                                                                                                                                                                                                           | Reported on Page # |
|-----------------------------------|---------|------------------------------------------------------------------------------------------------------------------------------------------------------------------------------------------------------------------------------------------------------------------------------------------------------------------------------------------------------------------------------------------------------------------------------------------------------------------------------------------------------------------------------------------------------------------------------------------------------------------------------------------------------------------------------------------------------------------------------------------------------------------------------------------------------------------------------------------------------------------------------------------------------------------------------------------------------------------------------------------------------------------------------------------------------------------------------------------------------------------------------------------------------------------------------------------------------------------------------------------------------------------------------------------------------------------------------------------------------------------------------------------------------------------------------------------------------------------------------------------------------------------------------------------------------------------------------------------------------------------------------------------------------------------------------------------------------------------------------------------------------------------------------------------------------------------------------------------------------------------------------------------|--------------------|
| <b>ADMINISTRATIVE INFORMATION</b> |         |                                                                                                                                                                                                                                                                                                                                                                                                                                                                                                                                                                                                                                                                                                                                                                                                                                                                                                                                                                                                                                                                                                                                                                                                                                                                                                                                                                                                                                                                                                                                                                                                                                                                                                                                                                                                                                                                                          |                    |
| Title:                            |         |                                                                                                                                                                                                                                                                                                                                                                                                                                                                                                                                                                                                                                                                                                                                                                                                                                                                                                                                                                                                                                                                                                                                                                                                                                                                                                                                                                                                                                                                                                                                                                                                                                                                                                                                                                                                                                                                                          |                    |
| Identification                    | 1a      | Comparative efficacy and acceptability of antidepressants, psychological interventions, and their combination for depressive disorder in children and adolescents: protocol for a network meta-analysis                                                                                                                                                                                                                                                                                                                                                                                                                                                                                                                                                                                                                                                                                                                                                                                                                                                                                                                                                                                                                                                                                                                                                                                                                                                                                                                                                                                                                                                                                                                                                                                                                                                                                  | 1                  |
| Update                            | 1b      | None                                                                                                                                                                                                                                                                                                                                                                                                                                                                                                                                                                                                                                                                                                                                                                                                                                                                                                                                                                                                                                                                                                                                                                                                                                                                                                                                                                                                                                                                                                                                                                                                                                                                                                                                                                                                                                                                                     |                    |
| Registration                      | 2       | PROSPERO CRD42015020841                                                                                                                                                                                                                                                                                                                                                                                                                                                                                                                                                                                                                                                                                                                                                                                                                                                                                                                                                                                                                                                                                                                                                                                                                                                                                                                                                                                                                                                                                                                                                                                                                                                                                                                                                                                                                                                                  | 4                  |
| Authors:                          |         |                                                                                                                                                                                                                                                                                                                                                                                                                                                                                                                                                                                                                                                                                                                                                                                                                                                                                                                                                                                                                                                                                                                                                                                                                                                                                                                                                                                                                                                                                                                                                                                                                                                                                                                                                                                                                                                                                          |                    |
| Contact                           | 3a      | Xinyu Zhou, Yuqing Zhang, Juncai Pu, Lining Yang, Peng Xie (Department of Neurology and Psychiatry, The First Affiliated Hospital of Chongqing Medical University, Chongqing, China; Institute of Neuroscience and the Collaborative Innovation Center for Brain Science, Chongqing Medical University, Chongqing, China)<br>Andrea Cipriani (Department of Psychiatry, University of Oxford, Warneford Hospital, Oxford, UK)<br>Pim Cuijpers (Department of Clinical, Neuro and Developmental Psychology, Amsterdam Public Health research institute, Vrije Universiteit Amsterdam, The Netherlands)<br>Sarah E. Hetrick (Orygen, The National Centre of Excellence in Youth Mental Health, and the Centre of Youth Mental Health, University of Melbourne, Melbourne, Australia)<br>John R. Weisz (Department of Psychology, Harvard University, Cambridge, MA, USA)<br>Cinzia Del Giovane (Department of Diagnostic, Clinical and Public Health Medicine, University of Modena and Reggio Emilia, Modena, Italy)<br>Toshiaki A. Furukawa (Department of Health Promotion and Human Behavior, Kyoto University Graduate School of Medicine and School of Public Health, Kyoto, Japan)<br>Jürgen Barth (Institute of Complementary and Integrative Medicine, University Hospital and University of Zurich, Zurich, Switzerland)<br>David Coghill (Departments of Paediatrics and Psychiatry, University of Melbourne, Melbourne, Australia)<br>Stefan Leucht (Department of Psychiatry and Psychotherapy, Technische Universität München, Munich, Germany)<br>Arun V Ravindran (Department of Psychiatry, University of Toronto, Toronto, ON, Canada)<br><br>Corresponding author :Peng Xie, Department of Neurology and Psychiatry, The First Affiliated Hospital of Chongqing Medical University, 1 Youyi Road, Yuzhong District, Chongqing 400016, China; E-mail: xiepeng973@126.com | 1-2                |
| Contributions                     | 3b      | PX, AC, and XZ conceived the study and drafted the protocol. PX, AC and XZ wrote the first draft of the manuscript. PC, SEH, JRW, CDG, TAF, JB, DC, AVR assisted in protocol design and revision. XZ, YZ, and LY participated in the search strategy                                                                                                                                                                                                                                                                                                                                                                                                                                                                                                                                                                                                                                                                                                                                                                                                                                                                                                                                                                                                                                                                                                                                                                                                                                                                                                                                                                                                                                                                                                                                                                                                                                     | 17                 |

development. CDG, and JP participated in the design of data synthesis and analysis. All the authors have approved the publication of the protocol.

Amendments 4 None

Support:

Sources 5a ational Basic Research Program of China (973 Program) (Grant No. 2009CB918300)

Sponsor 5b This work is supported by the National Basic Research Program of China (973 Program) (Grant No. 2009CB918300).

Role of sponsor or funder 5c The funders had no role in the protocol design; the writing of the protocol; or the decision to submit the protocol for publication.

## INTRODUCTION

Rationale 6 Depressive disorder in children and adolescents is a major public health problem. The course of depressive disorder in young people is often characterised by protracted episodes, frequent recurrence, and comorbid psychiatric disorders. Several clinical practice guidelines recommend that in children and adolescents, psychotherapy should be considered as the first-line intervention for the management of depressive disorder, while pharmacological treatments are often reserved for more severe illness or when psychotherapy does not work or is not available. Nevertheless, the evidence-base for psychotherapy to be more effective and safer than antidepressants in the treatment of child and adolescent depressive disorder is not well established. In our two previous network meta-analyses the comparative efficacy and acceptability of psychotherapies and antidepressants for depressive disorder in children and adolescents have been separately investigated 6

Objectives 7 The aim of the current protocol is to synthesise all this evidence and provide clinicians with a reliable treatment algorithm of the commonly used psychological, and pharmacological interventions, as well as their combinations for the acute treatment of depressive disorder in children and adolescents. 7

## METHODS

Eligibility criteria 8 **Types of participants**  
We will include studies that enrolled participants aged less than 18 years of age when they are initially enrolled in the studies, of both sexes with a diagnosis of depressive disorder based on standardised diagnostic criteria (e.g., the Diagnostic and Statistical Manual of Mental Disorders or the International Classification of Diseases). While it is accepted that subclinical depression still has a significant impact on an individuals' social and educational functioning, we will not include studies of this population. Similarly, studies where depressive disorder was not formally diagnosed will also be excluded for the same rationale that its clinical heterogeneity could violate the transitivity assumption in NMA (i.e. one can compare indirectly intervention B and C via intervention A). We will also exclude trials in which participants are described as having psychotic depression or treatment-resistant depression, as their treatment response differs from patients without treatment resistance or symptoms of psychosis. Trials focusing on child or adolescent bipolar disorder will also be excluded, but not those involving patients with other comorbid psychiatric disorders (e.g., anxiety disorder). Where a study includes both adults and children/adolescents and the randomisation had been stratified according this variable, the data will be included if data on the depressed youths can be separately extracted from the manuscript, or can be obtained from the authors. Studies conducted in both inpatient and outpatient settings will be included. RCTs recruiting participants with an overall sample size of fewer than ten patients will be excluded. 7-10

---

### Types of studies

Any randomised controlled trials (RCTs), including the first phase of cross-over trials as well as cluster-randomised trials, will be included. Quasi-randomised trials (e.g., those allocating participants using alternate days of the week) will be excluded. For trials of antidepressants alone, only double-blind RCTs (patients and raters blinded) will be included. As it is difficult to utilise a double-blind design for patients in trials of psychotherapy alone or the combination of antidepressant and psychotherapy, we will only include trials in which raters were blinded or participants were assessed by self-rating depression scales.

### Types of interventions

For pharmacological interventions, we will include any commonly prescribed oral antidepressants (fixed or flexible doses). These will include tricyclic antidepressants (TCAs; amitriptyline, clomipramine, nortriptyline, desipramine, imipramine, etc.), selective serotonin reuptake inhibitors (SSRIs; escitalopram, fluoxetine, paroxetine, sertraline, etc.), and serotonin-norepinephrine reuptake inhibitors (SNRIs; venlafaxine, duloxetine), as well as novel agents mirtazapine and nefazodone. In terms of psychological interventions, we will include any manualised or structured psychotherapies, e.g., behavioral therapy, cognitive-behavioral therapy, cognitive therapy, family therapy, interpersonal therapy, play therapy, problem-solving therapy, psychodynamic therapy, and supportive therapy. Also, we will include the combination of both psychological interventions and pharmacological interventions. For the pharmacological interventions, the control condition always is pill placebo, and these for psychological control conditions will include waiting-list (WL), treatment as usual (TAU), psychological placebo or attention placebo, as well as no-treatment (NT). All RCTs comparing any active intervention (psychological interventions, pharmacological interventions, or their combinations) with either active comparators or control conditions for acute treatment of depressive disorder in children and adolescents will be included. The acute phase will be defined as from 4 to 16 week. We will exclude trials with treatment duration of less than 4 weeks, because the onset of benefit for most antidepressants often takes at least 4 weeks. If a study present data for more than one time point within our pre-defined acute phase window or beyond 16 weeks, the 8-week (or the closest to 8-week) will be taken as the time. Trials comparing the same antidepressant at different therapeutic doses will be merged in the same node in the network analysis so long as they are within the dose range licensed by drug regulatory agencies. Also, trials comparing the same type of psychological interventions but at different numbers of therapeutic sessions, different delivery format (group, individual), different treatment medium (face-to-face, internet-based), and different treatment conditions (with or without family involvement) will be considered as the same node in the network analysis. We anticipate that any patient who meets all inclusion criteria, in principal, is equally likely to be randomised to any of the interventions in the synthesis comparator set.

### Types of outcome measures

#### Primary outcomes

- (1) Efficacy (as a continuous outcome), measured by the overall mean change scores on depressive symptom scales (self- or assessor-rated), e.g., Children's Depression Rating Scale (CDRS-R) and Hamilton Depression Rating Scale (HAMD) from baseline to endpoint.
- (2) Acceptability of treatment, defined as the proportion of patients who drop out of the study by any cause during the delivery of the intervention.

#### Secondary outcomes

---

1  
2  
3  
4  
5  
6  
7  
8  
9  
10  
11  
12  
13  
14  
15  
16  
17  
18  
19  
20  
21  
22  
23  
24  
25  
26  
27  
28  
29  
30  
31  
32  
33  
34  
35  
36  
37  
38  
39  
40  
41  
42  
43  
44  
45  
46  
47  
48  
49

---

(1) Efficacy (as dichotomous outcome), measured by the total number of patients who achieved the criteria of remission, defined as being below the threshold in depression rating score (e.g., less than 28 for CDRS-R), while these thresholds are different across trials.

(2) Tolerability of treatment, defined as the proportion of patients who discontinued treatment due to any adverse events during the delivery of the intervention.

(3) Suicide-related outcome, estimated by the reported cases of definitive suicidal behavior or suicidal ideation during the acute phase of treatment. The definition of suicide-related outcome is based on the Columbia Classification Algorithm of Suicide Assessment (C-CASA). For the antidepressants trials, the data on suicidality mainly referred to the Columbia re-analysis data reported in the FDA report. If trials are not included in this report, we will attempt to extract the data on suicide-related outcome from the Medicines and Healthcare products Regulatory Agency database or the pharmaceutical company website. For the psychological trials and the combination trials, we will mainly extract the data on suicidality from original text, and from related reviews.

(4) Global functional improvement, estimated by overall change scores on global assessment of functioning scales, e.g., Children's Global Assessment Scale (CGAS) and Global Assessment of Functioning Scale (GAF), or quality of life scales, e.g., Quality of Life Enjoyment and Satisfaction Questionnaire (Q-LES-Q). When data are reported on more than one measure, we will first chose data from the CGAS, then the GAF, and finally the Q-LES-Q and others.

---

|                     |   |                                                                                                                                                                                                                                                                                                                                                                                                                                                                                                                                                                                                                                                                                                                                                                                                                                                                                                                                                                                                                                                                                                                                                                                                                                                                                                                                                                                                                                                                                                                                                                                                                                                                                        |       |
|---------------------|---|----------------------------------------------------------------------------------------------------------------------------------------------------------------------------------------------------------------------------------------------------------------------------------------------------------------------------------------------------------------------------------------------------------------------------------------------------------------------------------------------------------------------------------------------------------------------------------------------------------------------------------------------------------------------------------------------------------------------------------------------------------------------------------------------------------------------------------------------------------------------------------------------------------------------------------------------------------------------------------------------------------------------------------------------------------------------------------------------------------------------------------------------------------------------------------------------------------------------------------------------------------------------------------------------------------------------------------------------------------------------------------------------------------------------------------------------------------------------------------------------------------------------------------------------------------------------------------------------------------------------------------------------------------------------------------------|-------|
| Information sources | 9 | For the identification of trials of antidepressant and psychotherapy alone for depressive disorder in children and adolescents, we will update the literature search of our two previous network meta-analyses. <sup>8,10</sup> Other eligible trials of the combinations of antidepressant and psychotherapy will be identified by searching PubMed, EMBASE, CENTRAL (Cochrane Central Register of Controlled Trials), Web of Science, PsycINFO, ProQuest, CINAHL, LiLACS from date of inception with Medical Subject Headings (MeSH) and text words. We will also search ClinicalTrials.gov in USA and other international trial registers via the International Clinical Trials Registry Platform (ICTRP) in WHO. We will also check relevant reports on the US Food and Drug Administration (FDA) website, and hand-search key journals, conference proceedings, such as, J Child Adolesc Psychopharmacol, J Am Acad Child Adolesc Psychiatry, Child Adolesc Psychiatry Ment Health, Psychopharmacol Bull, Arch Gen Psychiatry, Am J Psychiatry, Eur Psychiatry, Depress Anxiety. There will be no restrictions on language, or publication year. Additional relevant studies will be obtained by scanning reference lists of trials identified in the initial searches and relevant review papers. We will also inquire at the relative pharmaceutical companies (e.g., GlaxoSmithKline, Lilly, Organon, Forest Pharmaceuticals, Bristol-Myers Squibb) and search their websites for unpublished data. All relevant experts and principal manufacturers will be contacted to supplement incomplete reports of the original papers or to provide new data for unpublished studies. | 11-12 |
|---------------------|---|----------------------------------------------------------------------------------------------------------------------------------------------------------------------------------------------------------------------------------------------------------------------------------------------------------------------------------------------------------------------------------------------------------------------------------------------------------------------------------------------------------------------------------------------------------------------------------------------------------------------------------------------------------------------------------------------------------------------------------------------------------------------------------------------------------------------------------------------------------------------------------------------------------------------------------------------------------------------------------------------------------------------------------------------------------------------------------------------------------------------------------------------------------------------------------------------------------------------------------------------------------------------------------------------------------------------------------------------------------------------------------------------------------------------------------------------------------------------------------------------------------------------------------------------------------------------------------------------------------------------------------------------------------------------------------------|-------|

---

|                 |    |                                                                                                                                                                                                                                                                                                                                                                                                                                                                                                                                                                                                                                                                                                                                                                                                                                 |    |
|-----------------|----|---------------------------------------------------------------------------------------------------------------------------------------------------------------------------------------------------------------------------------------------------------------------------------------------------------------------------------------------------------------------------------------------------------------------------------------------------------------------------------------------------------------------------------------------------------------------------------------------------------------------------------------------------------------------------------------------------------------------------------------------------------------------------------------------------------------------------------|----|
| Search strategy | 10 | (depress* or dysthymi* or mood disorder* or affective disorder*) and (adolesc* or child* or boy* or girl* or juvenil* or minors or paediatric* or pediatri* or pubescen* or school* or student* or teen* or young or youth*) and (“selective serotonin reuptake inhibitor*” or SSRIs or “serotonin norepinephrine reuptake inhibitor*” or SNRIs or citalopram or fluoxetine or paroxetine or sertraline or escitalopram or fluvoxamine or venlafaxine or duloxetine “noradrenergic and specific serotonergic antidepressants” or NaSSA or mirtazapine or TCA or tricyclic or amitriptyline or clomipramine or desipramine or imipramine or nortriptyline) and (psychotherapy* or behavio* or “family therap*” or CBT or cognitive or interpersonal or IPT or “play therap*” or supportive or problem-solving or psychodynamic). | 11 |
|-----------------|----|---------------------------------------------------------------------------------------------------------------------------------------------------------------------------------------------------------------------------------------------------------------------------------------------------------------------------------------------------------------------------------------------------------------------------------------------------------------------------------------------------------------------------------------------------------------------------------------------------------------------------------------------------------------------------------------------------------------------------------------------------------------------------------------------------------------------------------|----|

---

Study records:

---



|    |                             |     |                                                                                                                                                                                                                                                                                                                                                                                                                                                                                                                                                                                                                                                                                                                                                                                                                                                                                                                                                                                                                                                                                                                                                                                                                                                                                                                                                                                                                                                                                                                                                                                                                                                                                                                                                                                                                                                                                                                                                                                                                                                                                                                                             |
|----|-----------------------------|-----|---------------------------------------------------------------------------------------------------------------------------------------------------------------------------------------------------------------------------------------------------------------------------------------------------------------------------------------------------------------------------------------------------------------------------------------------------------------------------------------------------------------------------------------------------------------------------------------------------------------------------------------------------------------------------------------------------------------------------------------------------------------------------------------------------------------------------------------------------------------------------------------------------------------------------------------------------------------------------------------------------------------------------------------------------------------------------------------------------------------------------------------------------------------------------------------------------------------------------------------------------------------------------------------------------------------------------------------------------------------------------------------------------------------------------------------------------------------------------------------------------------------------------------------------------------------------------------------------------------------------------------------------------------------------------------------------------------------------------------------------------------------------------------------------------------------------------------------------------------------------------------------------------------------------------------------------------------------------------------------------------------------------------------------------------------------------------------------------------------------------------------------------|
| 1  |                             |     |                                                                                                                                                                                                                                                                                                                                                                                                                                                                                                                                                                                                                                                                                                                                                                                                                                                                                                                                                                                                                                                                                                                                                                                                                                                                                                                                                                                                                                                                                                                                                                                                                                                                                                                                                                                                                                                                                                                                                                                                                                                                                                                                             |
| 2  |                             |     |                                                                                                                                                                                                                                                                                                                                                                                                                                                                                                                                                                                                                                                                                                                                                                                                                                                                                                                                                                                                                                                                                                                                                                                                                                                                                                                                                                                                                                                                                                                                                                                                                                                                                                                                                                                                                                                                                                                                                                                                                                                                                                                                             |
| 3  |                             |     |                                                                                                                                                                                                                                                                                                                                                                                                                                                                                                                                                                                                                                                                                                                                                                                                                                                                                                                                                                                                                                                                                                                                                                                                                                                                                                                                                                                                                                                                                                                                                                                                                                                                                                                                                                                                                                                                                                                                                                                                                                                                                                                                             |
| 4  |                             |     |                                                                                                                                                                                                                                                                                                                                                                                                                                                                                                                                                                                                                                                                                                                                                                                                                                                                                                                                                                                                                                                                                                                                                                                                                                                                                                                                                                                                                                                                                                                                                                                                                                                                                                                                                                                                                                                                                                                                                                                                                                                                                                                                             |
| 5  | Data management             | 11a | Literature search results will be imported to Endnote and the duplicates will be removed during the study selection process. We will screening citations based on the inclusion and exclusion criteria. 12                                                                                                                                                                                                                                                                                                                                                                                                                                                                                                                                                                                                                                                                                                                                                                                                                                                                                                                                                                                                                                                                                                                                                                                                                                                                                                                                                                                                                                                                                                                                                                                                                                                                                                                                                                                                                                                                                                                                  |
| 6  |                             |     |                                                                                                                                                                                                                                                                                                                                                                                                                                                                                                                                                                                                                                                                                                                                                                                                                                                                                                                                                                                                                                                                                                                                                                                                                                                                                                                                                                                                                                                                                                                                                                                                                                                                                                                                                                                                                                                                                                                                                                                                                                                                                                                                             |
| 7  | Selection process           | 11b | Titles and abstracts identified from the search strategies will be independently examined by two reviewers (XZ and YZ). If both reviewers judge that the trial does not meet eligibility criteria, we will exclude it. Then, we will obtain the full-texts of all remaining articles and determine whether to include them according to inclusion criteria described above. We will calculate the inter-rater reliability of the two raters. Any disagreements will be resolved by a third review author (AC or PX) or by consultation with the authors of the articles. The reasons for exclusion of trials will be reported in the characteristics of excluded studies list. 12                                                                                                                                                                                                                                                                                                                                                                                                                                                                                                                                                                                                                                                                                                                                                                                                                                                                                                                                                                                                                                                                                                                                                                                                                                                                                                                                                                                                                                                           |
| 8  |                             |     |                                                                                                                                                                                                                                                                                                                                                                                                                                                                                                                                                                                                                                                                                                                                                                                                                                                                                                                                                                                                                                                                                                                                                                                                                                                                                                                                                                                                                                                                                                                                                                                                                                                                                                                                                                                                                                                                                                                                                                                                                                                                                                                                             |
| 9  | Data collection process     | 11c | Two independent reviewers (XZ and YZ) will extract the data from each included trial using standardised data extraction forms. We will assess and report the reliability of the reviewers' data extraction on each coded variable. Any disagreements will be resolved by a third review author (AC or PX). Where necessary, the authors of the studies will be contacted for further information. 12-13                                                                                                                                                                                                                                                                                                                                                                                                                                                                                                                                                                                                                                                                                                                                                                                                                                                                                                                                                                                                                                                                                                                                                                                                                                                                                                                                                                                                                                                                                                                                                                                                                                                                                                                                     |
| 10 |                             |     |                                                                                                                                                                                                                                                                                                                                                                                                                                                                                                                                                                                                                                                                                                                                                                                                                                                                                                                                                                                                                                                                                                                                                                                                                                                                                                                                                                                                                                                                                                                                                                                                                                                                                                                                                                                                                                                                                                                                                                                                                                                                                                                                             |
| 11 | Data items                  | 12  | Study characteristics (e.g., first listed author, publication year, title, publication type, publication journal, country, and sponsor), patient characteristics (e.g., diagnostic criteria, comorbidities, the age of patients, patient setting, the number of patients, the gender of patients, and severity of depression at baseline), intervention details (e.g., the type of intervention, the treatment duration, the dose of antidepressant agent, the length and number of sessions of psychotherapy, treatment delivery and treatment medium of psychotherapy) and outcome measures (primary outcomes and secondary outcomes). 12                                                                                                                                                                                                                                                                                                                                                                                                                                                                                                                                                                                                                                                                                                                                                                                                                                                                                                                                                                                                                                                                                                                                                                                                                                                                                                                                                                                                                                                                                                 |
| 12 |                             |     |                                                                                                                                                                                                                                                                                                                                                                                                                                                                                                                                                                                                                                                                                                                                                                                                                                                                                                                                                                                                                                                                                                                                                                                                                                                                                                                                                                                                                                                                                                                                                                                                                                                                                                                                                                                                                                                                                                                                                                                                                                                                                                                                             |
| 13 | Outcomes and prioritization | 13  | Primary outcomes<br>(1) Efficacy (as a continuous outcome), measured by the overall mean change scores on depressive symptom scales (self- or assessor-rated), e.g., Children's Depression Rating Scale (CDRS-R) and Hamilton Depression Rating Scale (HAMD) from baseline to endpoint.<br>(2) Acceptability of treatment, defined as the proportion of patients who drop out of the study by any cause during the delivery of the intervention.<br>Secondary outcomes<br>(1) Efficacy (as dichotomous outcome), measured by the total number of patients who achieved the criteria of remission, defined as being below the threshold in depression rating score (e.g., less than 28 for CDRS-R), while these thresholds are different across trials.<br>(2) Tolerability of treatment, defined as the proportion of patients who discontinued treatment due to any adverse events during the delivery of the intervention. 10-11<br>(3) Suicide-related outcome, estimated by the reported cases of definitive suicidal behavior or suicidal ideation during the acute phase of treatment. The definition of suicide-related outcome is based on the Columbia Classification Algorithm of Suicide Assessment (C-CASA). For the antidepressants trials, the data on suicidality mainly referred to the Columbia re-analysis data reported in the FDA report. If trials are not included in this report, we will attempt to extract the data on suicide-related outcome from the Medicines and Healthcare products Regulatory Agency database or the pharmaceutical company website. For the psychological trials and the combination trials, we will mainly extract the data on suicidality from original text, and from related reviews.<br>(4) Global functional improvement, estimated by overall change scores on global assessment of functioning scales, e.g., Children's Global Assessment Scale (CGAS) and Global Assessment of Functioning Scale (GAF), or quality of life scales, e.g., Quality of Life Enjoyment and Satisfaction Questionnaire (Q-LES-Q). When data are reported on more than one measure, we will first chose |
| 14 |                             |     |                                                                                                                                                                                                                                                                                                                                                                                                                                                                                                                                                                                                                                                                                                                                                                                                                                                                                                                                                                                                                                                                                                                                                                                                                                                                                                                                                                                                                                                                                                                                                                                                                                                                                                                                                                                                                                                                                                                                                                                                                                                                                                                                             |
| 15 |                             |     |                                                                                                                                                                                                                                                                                                                                                                                                                                                                                                                                                                                                                                                                                                                                                                                                                                                                                                                                                                                                                                                                                                                                                                                                                                                                                                                                                                                                                                                                                                                                                                                                                                                                                                                                                                                                                                                                                                                                                                                                                                                                                                                                             |
| 16 |                             |     |                                                                                                                                                                                                                                                                                                                                                                                                                                                                                                                                                                                                                                                                                                                                                                                                                                                                                                                                                                                                                                                                                                                                                                                                                                                                                                                                                                                                                                                                                                                                                                                                                                                                                                                                                                                                                                                                                                                                                                                                                                                                                                                                             |
| 17 |                             |     |                                                                                                                                                                                                                                                                                                                                                                                                                                                                                                                                                                                                                                                                                                                                                                                                                                                                                                                                                                                                                                                                                                                                                                                                                                                                                                                                                                                                                                                                                                                                                                                                                                                                                                                                                                                                                                                                                                                                                                                                                                                                                                                                             |
| 18 |                             |     |                                                                                                                                                                                                                                                                                                                                                                                                                                                                                                                                                                                                                                                                                                                                                                                                                                                                                                                                                                                                                                                                                                                                                                                                                                                                                                                                                                                                                                                                                                                                                                                                                                                                                                                                                                                                                                                                                                                                                                                                                                                                                                                                             |
| 19 |                             |     |                                                                                                                                                                                                                                                                                                                                                                                                                                                                                                                                                                                                                                                                                                                                                                                                                                                                                                                                                                                                                                                                                                                                                                                                                                                                                                                                                                                                                                                                                                                                                                                                                                                                                                                                                                                                                                                                                                                                                                                                                                                                                                                                             |
| 20 |                             |     |                                                                                                                                                                                                                                                                                                                                                                                                                                                                                                                                                                                                                                                                                                                                                                                                                                                                                                                                                                                                                                                                                                                                                                                                                                                                                                                                                                                                                                                                                                                                                                                                                                                                                                                                                                                                                                                                                                                                                                                                                                                                                                                                             |
| 21 |                             |     |                                                                                                                                                                                                                                                                                                                                                                                                                                                                                                                                                                                                                                                                                                                                                                                                                                                                                                                                                                                                                                                                                                                                                                                                                                                                                                                                                                                                                                                                                                                                                                                                                                                                                                                                                                                                                                                                                                                                                                                                                                                                                                                                             |
| 22 |                             |     |                                                                                                                                                                                                                                                                                                                                                                                                                                                                                                                                                                                                                                                                                                                                                                                                                                                                                                                                                                                                                                                                                                                                                                                                                                                                                                                                                                                                                                                                                                                                                                                                                                                                                                                                                                                                                                                                                                                                                                                                                                                                                                                                             |
| 23 |                             |     |                                                                                                                                                                                                                                                                                                                                                                                                                                                                                                                                                                                                                                                                                                                                                                                                                                                                                                                                                                                                                                                                                                                                                                                                                                                                                                                                                                                                                                                                                                                                                                                                                                                                                                                                                                                                                                                                                                                                                                                                                                                                                                                                             |
| 24 |                             |     |                                                                                                                                                                                                                                                                                                                                                                                                                                                                                                                                                                                                                                                                                                                                                                                                                                                                                                                                                                                                                                                                                                                                                                                                                                                                                                                                                                                                                                                                                                                                                                                                                                                                                                                                                                                                                                                                                                                                                                                                                                                                                                                                             |
| 25 |                             |     |                                                                                                                                                                                                                                                                                                                                                                                                                                                                                                                                                                                                                                                                                                                                                                                                                                                                                                                                                                                                                                                                                                                                                                                                                                                                                                                                                                                                                                                                                                                                                                                                                                                                                                                                                                                                                                                                                                                                                                                                                                                                                                                                             |
| 26 |                             |     |                                                                                                                                                                                                                                                                                                                                                                                                                                                                                                                                                                                                                                                                                                                                                                                                                                                                                                                                                                                                                                                                                                                                                                                                                                                                                                                                                                                                                                                                                                                                                                                                                                                                                                                                                                                                                                                                                                                                                                                                                                                                                                                                             |
| 27 |                             |     |                                                                                                                                                                                                                                                                                                                                                                                                                                                                                                                                                                                                                                                                                                                                                                                                                                                                                                                                                                                                                                                                                                                                                                                                                                                                                                                                                                                                                                                                                                                                                                                                                                                                                                                                                                                                                                                                                                                                                                                                                                                                                                                                             |
| 28 |                             |     |                                                                                                                                                                                                                                                                                                                                                                                                                                                                                                                                                                                                                                                                                                                                                                                                                                                                                                                                                                                                                                                                                                                                                                                                                                                                                                                                                                                                                                                                                                                                                                                                                                                                                                                                                                                                                                                                                                                                                                                                                                                                                                                                             |
| 29 |                             |     |                                                                                                                                                                                                                                                                                                                                                                                                                                                                                                                                                                                                                                                                                                                                                                                                                                                                                                                                                                                                                                                                                                                                                                                                                                                                                                                                                                                                                                                                                                                                                                                                                                                                                                                                                                                                                                                                                                                                                                                                                                                                                                                                             |
| 30 |                             |     |                                                                                                                                                                                                                                                                                                                                                                                                                                                                                                                                                                                                                                                                                                                                                                                                                                                                                                                                                                                                                                                                                                                                                                                                                                                                                                                                                                                                                                                                                                                                                                                                                                                                                                                                                                                                                                                                                                                                                                                                                                                                                                                                             |
| 31 |                             |     |                                                                                                                                                                                                                                                                                                                                                                                                                                                                                                                                                                                                                                                                                                                                                                                                                                                                                                                                                                                                                                                                                                                                                                                                                                                                                                                                                                                                                                                                                                                                                                                                                                                                                                                                                                                                                                                                                                                                                                                                                                                                                                                                             |
| 32 |                             |     |                                                                                                                                                                                                                                                                                                                                                                                                                                                                                                                                                                                                                                                                                                                                                                                                                                                                                                                                                                                                                                                                                                                                                                                                                                                                                                                                                                                                                                                                                                                                                                                                                                                                                                                                                                                                                                                                                                                                                                                                                                                                                                                                             |
| 33 |                             |     |                                                                                                                                                                                                                                                                                                                                                                                                                                                                                                                                                                                                                                                                                                                                                                                                                                                                                                                                                                                                                                                                                                                                                                                                                                                                                                                                                                                                                                                                                                                                                                                                                                                                                                                                                                                                                                                                                                                                                                                                                                                                                                                                             |
| 34 |                             |     |                                                                                                                                                                                                                                                                                                                                                                                                                                                                                                                                                                                                                                                                                                                                                                                                                                                                                                                                                                                                                                                                                                                                                                                                                                                                                                                                                                                                                                                                                                                                                                                                                                                                                                                                                                                                                                                                                                                                                                                                                                                                                                                                             |
| 35 |                             |     |                                                                                                                                                                                                                                                                                                                                                                                                                                                                                                                                                                                                                                                                                                                                                                                                                                                                                                                                                                                                                                                                                                                                                                                                                                                                                                                                                                                                                                                                                                                                                                                                                                                                                                                                                                                                                                                                                                                                                                                                                                                                                                                                             |
| 36 |                             |     |                                                                                                                                                                                                                                                                                                                                                                                                                                                                                                                                                                                                                                                                                                                                                                                                                                                                                                                                                                                                                                                                                                                                                                                                                                                                                                                                                                                                                                                                                                                                                                                                                                                                                                                                                                                                                                                                                                                                                                                                                                                                                                                                             |
| 37 |                             |     |                                                                                                                                                                                                                                                                                                                                                                                                                                                                                                                                                                                                                                                                                                                                                                                                                                                                                                                                                                                                                                                                                                                                                                                                                                                                                                                                                                                                                                                                                                                                                                                                                                                                                                                                                                                                                                                                                                                                                                                                                                                                                                                                             |
| 38 |                             |     |                                                                                                                                                                                                                                                                                                                                                                                                                                                                                                                                                                                                                                                                                                                                                                                                                                                                                                                                                                                                                                                                                                                                                                                                                                                                                                                                                                                                                                                                                                                                                                                                                                                                                                                                                                                                                                                                                                                                                                                                                                                                                                                                             |
| 39 |                             |     |                                                                                                                                                                                                                                                                                                                                                                                                                                                                                                                                                                                                                                                                                                                                                                                                                                                                                                                                                                                                                                                                                                                                                                                                                                                                                                                                                                                                                                                                                                                                                                                                                                                                                                                                                                                                                                                                                                                                                                                                                                                                                                                                             |
| 40 |                             |     |                                                                                                                                                                                                                                                                                                                                                                                                                                                                                                                                                                                                                                                                                                                                                                                                                                                                                                                                                                                                                                                                                                                                                                                                                                                                                                                                                                                                                                                                                                                                                                                                                                                                                                                                                                                                                                                                                                                                                                                                                                                                                                                                             |
| 41 |                             |     |                                                                                                                                                                                                                                                                                                                                                                                                                                                                                                                                                                                                                                                                                                                                                                                                                                                                                                                                                                                                                                                                                                                                                                                                                                                                                                                                                                                                                                                                                                                                                                                                                                                                                                                                                                                                                                                                                                                                                                                                                                                                                                                                             |
| 42 |                             |     |                                                                                                                                                                                                                                                                                                                                                                                                                                                                                                                                                                                                                                                                                                                                                                                                                                                                                                                                                                                                                                                                                                                                                                                                                                                                                                                                                                                                                                                                                                                                                                                                                                                                                                                                                                                                                                                                                                                                                                                                                                                                                                                                             |
| 43 |                             |     |                                                                                                                                                                                                                                                                                                                                                                                                                                                                                                                                                                                                                                                                                                                                                                                                                                                                                                                                                                                                                                                                                                                                                                                                                                                                                                                                                                                                                                                                                                                                                                                                                                                                                                                                                                                                                                                                                                                                                                                                                                                                                                                                             |
| 44 |                             |     |                                                                                                                                                                                                                                                                                                                                                                                                                                                                                                                                                                                                                                                                                                                                                                                                                                                                                                                                                                                                                                                                                                                                                                                                                                                                                                                                                                                                                                                                                                                                                                                                                                                                                                                                                                                                                                                                                                                                                                                                                                                                                                                                             |
| 45 |                             |     |                                                                                                                                                                                                                                                                                                                                                                                                                                                                                                                                                                                                                                                                                                                                                                                                                                                                                                                                                                                                                                                                                                                                                                                                                                                                                                                                                                                                                                                                                                                                                                                                                                                                                                                                                                                                                                                                                                                                                                                                                                                                                                                                             |
| 46 |                             |     |                                                                                                                                                                                                                                                                                                                                                                                                                                                                                                                                                                                                                                                                                                                                                                                                                                                                                                                                                                                                                                                                                                                                                                                                                                                                                                                                                                                                                                                                                                                                                                                                                                                                                                                                                                                                                                                                                                                                                                                                                                                                                                                                             |
| 47 |                             |     |                                                                                                                                                                                                                                                                                                                                                                                                                                                                                                                                                                                                                                                                                                                                                                                                                                                                                                                                                                                                                                                                                                                                                                                                                                                                                                                                                                                                                                                                                                                                                                                                                                                                                                                                                                                                                                                                                                                                                                                                                                                                                                                                             |
| 48 |                             |     |                                                                                                                                                                                                                                                                                                                                                                                                                                                                                                                                                                                                                                                                                                                                                                                                                                                                                                                                                                                                                                                                                                                                                                                                                                                                                                                                                                                                                                                                                                                                                                                                                                                                                                                                                                                                                                                                                                                                                                                                                                                                                                                                             |
| 49 |                             |     |                                                                                                                                                                                                                                                                                                                                                                                                                                                                                                                                                                                                                                                                                                                                                                                                                                                                                                                                                                                                                                                                                                                                                                                                                                                                                                                                                                                                                                                                                                                                                                                                                                                                                                                                                                                                                                                                                                                                                                                                                                                                                                                                             |

|                                    |     |                                                                                                                                                                                                                                                                                                                                                                                                                                                                                                                                                                                                                                                                                                                                                                                                                                                                                                                                                                                                                                                                                                                                                                                                                                                                                                                                                                                                                                                                                                                                                                                                                                                                                                                                                                                                                                                                                                                                                                                                                                                                                                                                                                                                                        |       |
|------------------------------------|-----|------------------------------------------------------------------------------------------------------------------------------------------------------------------------------------------------------------------------------------------------------------------------------------------------------------------------------------------------------------------------------------------------------------------------------------------------------------------------------------------------------------------------------------------------------------------------------------------------------------------------------------------------------------------------------------------------------------------------------------------------------------------------------------------------------------------------------------------------------------------------------------------------------------------------------------------------------------------------------------------------------------------------------------------------------------------------------------------------------------------------------------------------------------------------------------------------------------------------------------------------------------------------------------------------------------------------------------------------------------------------------------------------------------------------------------------------------------------------------------------------------------------------------------------------------------------------------------------------------------------------------------------------------------------------------------------------------------------------------------------------------------------------------------------------------------------------------------------------------------------------------------------------------------------------------------------------------------------------------------------------------------------------------------------------------------------------------------------------------------------------------------------------------------------------------------------------------------------------|-------|
|                                    |     | <p>data from the CGAS, then the GAF, and finally the Q-LES-Q and others.</p> <p>Where depression symptoms are measured using more than one depression scale in a trial, we will extract data from the depressive scales on the basis of a hierarchy of rating scales. The hierarchy will be based on psychometric properties and appropriateness for use with children and adolescents and for consistency of use across trials (referred from the Zhou et al study). We will also establish a hierarchy of informants of depressive rating scales, with the clinician report first in the hierarchy, and then the child or adolescent self-report.</p>                                                                                                                                                                                                                                                                                                                                                                                                                                                                                                                                                                                                                                                                                                                                                                                                                                                                                                                                                                                                                                                                                                                                                                                                                                                                                                                                                                                                                                                                                                                                                                |       |
| Risk of bias in individual studies | 14  | <p>We will assess risk of bias as “low risk”, “unclear risk”, or “high risk”, in accordance with the Cochrane Collaboration’s Risk of bias tool as described in the Cochrane Hand book for Systematic Reviews of Interventions. The following items will be assessed: sequence generation, allocation concealment, blinding of participants and personnel, blinding of outcome assessors, incomplete outcome data, selective outcome reporting, and other sources of bias (e.g., sponsorship bias/researcher allegiance bias). Two independent review authors (XZ and YZ) will assess the risk of bias in selected studies. Degree of agreement between the two independent raters will be reported. Any disagreements will be resolved by a third review author (AC or PX). Where necessary, the authors of the studies will be contacted for further information. Studies will be classified as having high risk of bias if two or more domains were rated as high risk of bias; low if five or more were rated as low risk of bias and none was rated as high risk of bias, and all other cases will be assumed to pertain to moderate risk.</p>                                                                                                                                                                                                                                                                                                                                                                                                                                                                                                                                                                                                                                                                                                                                                                                                                                                                                                                                                                                                                                                                    | 13    |
| Data synthesis                     | 15a | <p>We will perform Bayesian network meta-analysis to compare the relative outcomes of different antidepressant medications, psychotherapies or their combination from the median of the posterior distribution.</p>                                                                                                                                                                                                                                                                                                                                                                                                                                                                                                                                                                                                                                                                                                                                                                                                                                                                                                                                                                                                                                                                                                                                                                                                                                                                                                                                                                                                                                                                                                                                                                                                                                                                                                                                                                                                                                                                                                                                                                                                    | 13    |
|                                    | 15b | <p>Network meta-analysis combines direct and indirect evidence for all relative treatment effects and provides estimates with maximum power. First, we will perform pairwise meta-analyses of direct evidence using the random-effects model with STATA version 14.0. Second, we will also perform a random-effects network meta-analysis (NMA) within a Bayesian framework using Markov chain Monte Carlo in WinBUGS version 1.4.3. Where different measures are used to assess the same outcome, continuous outcomes data will be pooled with standardised mean difference (SMD), and dichotomous outcomes will be analysed by calculating the odds ratio (OR). In the presence of minimally informative priors, Credible Intervals (CrIs) can be interpreted similarly to confidence intervals (CIs).</p> <p>Missing dichotomous outcome data will be managed according to the intention to treat (ITT) principle, and all the dropouts after randomisation will be considered to be non-responders. Missing continuous outcome data will be analysed using the completer data. When p-values, t-values, confidence intervals or standard errors are reported in articles, SD will be calculated from their values. Where SDs are missing, attempts will be made to obtain these data through contacting trial authors. When this fails, they will be borrowed from the other trials in the network or from other published reports.</p> <p>In the analysis of network meta-analysis, the pooled estimates will be obtained using the Markov Chains Monte Carlo method. Two Markov chains will be run simultaneously with different arbitrarily chosen initial values and non-informative priors will be used for the parameters. To ensure convergence, trace plots and the Brooks-Gelman-Rubin statistic will be assessed. We will also estimate the ranking probabilities for all treatments of being at each possible rank for each intervention. Then, we will obtain a treatment hierarchy using the surface under the cumulative ranking curve (SUCRA) and mean ranks. SUCRA can also be interpreted as the percentage of efficacy/safety of a treatment that would be ranked first without uncertainty.</p> | 13-14 |
|                                    | 15c | <p>Where possible, we will conduct the network meta-regression meta-analyses of data on primary outcomes for the: (i) age of participants (children vs. adolescents); (ii) sex ratio; (iii) the severity of depressive symptoms at baseline; and (iv) the treatment duration. If possible, we will do some extra subgroup analyses according to the results of heterogeneity and inconsistency. In the</p>                                                                                                                                                                                                                                                                                                                                                                                                                                                                                                                                                                                                                                                                                                                                                                                                                                                                                                                                                                                                                                                                                                                                                                                                                                                                                                                                                                                                                                                                                                                                                                                                                                                                                                                                                                                                             | 15-16 |

1  
2  
3  
4  
5  
6  
7  
8  
9  
10  
11  
12  
13  
14  
15  
16  
17  
18  
19  
20  
21  
22  
23  
24  
25  
26  
27  
28  
29  
30  
31  
32  
33  
34  
35  
36  
37  
38  
39  
40  
41  
42  
43  
44  
45  
46  
47  
48  
49

|                                   |     |                                                                                                                                                                                                                                                                                                                                                                                                                                     |    |
|-----------------------------------|-----|-------------------------------------------------------------------------------------------------------------------------------------------------------------------------------------------------------------------------------------------------------------------------------------------------------------------------------------------------------------------------------------------------------------------------------------|----|
|                                   |     | sensitivity analysis, trials where missing data have been imputed will be excluded, and trials where high risk of bias rating have been assessed will be excluded. And, we will not only test whether the results change but also if transitivity (consistency/model fit) is affected. We will also examine some variables (e.g., sample size of trials <sup>53</sup> ), as continuous measure in meta-regression analyses.         |    |
|                                   | 15d | A systematic narrative synthesis will be provided with information presented in the text and tables to summarize and explain the characteristics and findings of the included studies.                                                                                                                                                                                                                                              | 15 |
| Meta-bias(es)                     | 16  | We will use the contour-enhanced funnel plot and Egger's test to assess risk of publication bias within each pairwise comparison. We will also use the comparison-adjusted funnel plots of all trials with placebo controls or inactive controls to investigate whether results in imprecise trials differ from those in more precise trials in network meta-analysis.                                                              | 15 |
| Confidence in cumulative evidence | 17  | We will also assess the quality of evidence contributing to primary outcomes with the GRADE framework, which characterises the quality of a body of evidence on the basis of the study limitations, imprecision, heterogeneity or inconsistency, indirectness, and publication bias. The starting point for confidence in each network estimate is high, but will be downgraded according to the assessments of these five aspects. | 16 |

**\* It is strongly recommended that this checklist be read in conjunction with the PRISMA-P Explanation and Elaboration (cite when available) for important clarification on the items. Amendments to a review protocol should be tracked and dated. The copyright for PRISMA-P (including checklist) is held by the PRISMA-P Group and is distributed under a Creative Commons Attribution Licence 4.0.**

*From: Shamseer L, Moher D, Clarke M, Ghersi D, Liberati A, Petticrew M, Shekelle P, Stewart L, PRISMA-P Group. Preferred reporting items for systematic review and meta-analysis protocols (PRISMA-P) 2015: elaboration and explanation. BMJ. 2015 Jan 2;349(jan02 1):g7647.*
